# Supplementary material for: A Complex Recombination Pattern in the Genome of Allotetraploid Brassica napus as Revealed by a High-Density Genetic Map
Source: PubMed Central journal article supplement (PMC4214627; doi:10.1371/journal.pone.0109910), 2014-10-30
Supplement: pone.0109910.s001.pdf [file pone.0109910.s001.pdf]

**Table S1. Detailed information of the genetic linkage map of the HJ DH population, comparative genomic analysis with *B. rapa*, *B. oleracea* and Arabidopsis**

| <i>B. napus</i> |             |          | <i>B. rapa/B. oleracea</i>    |                              |           | <i>A. thaliana</i> |                        |                |
|-----------------|-------------|----------|-------------------------------|------------------------------|-----------|--------------------|------------------------|----------------|
| LG              | Marker      | Position | Homoeologous locus            | Homoeologous collinear locus |           | Homoeologous locus | Conserved block/island |                |
| BnA01           | bnA1059     | 0        | BrA01_284970_301 <sup>a</sup> | BrA01 <sup>b</sup>           | 284,970   | AT2G29995          |                        |                |
| BnA01           | bnA1060     | 0.7      | BrA01_316954_302              | BrA01                        | 316,954   | AT4G04800          |                        |                |
| BnA01           | bnA5902     | 1.4      | BrA01_344735_301              | BrA01                        | 344,735   | AT1G22600          |                        |                |
| BnA01           | bnA5487     | 3.3      | BrA01_405988_295              | BrA01                        | 405,988   | AT4G40040          | AT4G40040              | U <sup>c</sup> |
| BnA01           | BEN334      | 5.2      |                               |                              |           | AT4G36930          | AT4G36930              | U              |
| BnA01           | BGO001      | 5.2      | BrA01_759441_243              | BrA01                        | 759,441   | AT4G37250          | AT4G37250              | U              |
| BnA01           | bnA4875     | 7.3      | BrA01_806580_171              | BrA01                        | 806,580   | AT3G44510          |                        |                |
| BnA01           | bnA5488     | 7.3      | BrA01_855235_301              | BrA01                        | 855,235   | AT4G37080          | AT4G37080              | U              |
| BnA01           | bnA1065     | 8.7      | BrA01_922051_301              | BrA01                        | 922,051   | AT4G36870          | AT4G36870              | U              |
| BnA01           | bnA5005     | 8.7      | BrA01_974796_295              | BrA01                        | 974,796   | AT4G15093          |                        |                |
| BnA01           | bnA1067     | 8.7      | BrA01_975490_301              | BrA01                        | 975,490   | AT4G12870          |                        |                |
| BnA01           | BEN9        | 10       | BrA01_1040762_198             | BrA01                        | 1,040,762 | AT4G36550          | AT4G36550              | U              |
| BnA01           | bnA1070     | 11.8     | BrA01_1103533_255             | BrA01                        | 1,103,533 | AT4G36360          | AT4G36360              | U              |
| BnA01           | bnA1073     | 14.1     | BrA01_1291584_301             | BrA01                        | 1,291,584 | AT4G35840          | AT4G35840              | U              |
| BnA01           | bnA1074     | 14.7     | BrA01_1322683_301             | BrA01                        | 1,322,683 | AT4G35790          | AT4G35790              | U              |
| BnA01           | bnA5432     | 14.7     | BoC01_1878304_252             |                              |           | AT4G35320          | AT4G35320              | U              |
| BnA01           | bnA1076     | 15.4     | BrA01_1439859_301             | BrA01                        | 1,439,859 | AT4G35310          | AT4G35310              | U              |
| BnA01           | bnA1093     | 15.4     | BrA01_1459501_301             | BrA01                        | 1,459,501 | AT4G35270          | AT4G35270              | U              |
| BnA01           | NIAB_SSR106 | 16.1     | BrA01_1466151_286             | BrA01                        | 1,466,151 | AT4G35270          | AT4G35270              | U              |
| BnA01           | bnA5906     | 19.6     | BoC01_2488980_301             |                              |           | AT4G34138          | AT4G34138              | U              |
| BnA01           | bnA1105     | 22.4     | BrA01_1977120_301             | BrA01                        | 1,977,120 | AT4G34060          | AT4G34060              | U              |
| BnA01           | bnA1106     | 22.4     | BrA01_2067347_301             | BrA01                        | 2,067,347 | AT4G33740          | AT4G33740              | U              |

|       |           |      |                    |       |           |           |           |   |
|-------|-----------|------|--------------------|-------|-----------|-----------|-----------|---|
| BnA01 | bnA1109   | 23.1 | BrA01_2284682_297  | BrA01 | 2,284,682 | AT4G33080 | AT4G33080 | U |
| BnA01 | bnA1112   | 23.5 | BrA01_2359318_213  | BrA01 | 2,359,318 | AT4G32910 | AT4G32910 | U |
| BnA01 | BEN10     | 23.9 | BrA01_2500870_113  | BrA01 | 2,500,870 | AT4G32680 | AT4G32680 | U |
| BnA01 | BGO108    | 24.4 | BrA01_2567859_160  | BrA01 | 2,567,859 | AT4G32590 | AT4G32590 | U |
| BnA01 | bnA1115   | 26   | BrA01_2667541_301  | BrA01 | 2,667,541 | AT4G32320 | AT4G32320 | U |
| BnA01 | bnA1116   | 26   | BrA01_2694173_301  | BrA01 | 2,694,173 | AT4G32280 | AT4G32280 | U |
| BnA01 | bnA1117   | 26.2 | BrA01_2862804_302  | BrA01 | 2,862,804 | AT5G55550 |           |   |
| BnA01 | bnA1022   | 26.4 | BoC04_18829093_301 |       |           | AT2G14190 |           |   |
| BnA01 | OI10-D03A | 27.5 | BrA01_3282738_133  | BrA01 | 3,282,738 | AT1G71120 |           |   |
| BnA01 | bnA1121   | 28.2 | BrA01_3304097_297  | BrA01 | 3,304,097 | AT2G24050 |           |   |
| BnA01 | bnA1123   | 28.2 | BrA01_3640041_301  | BrA01 | 3,640,041 | AT4G29940 | AT4G29940 | U |
| BnA01 | bnA5499   | 28.6 | BrA09_35709086_301 |       |           | AT3G29572 |           |   |
| BnA01 | bnA0123   | 29   | BrA01_3744574_303  | BrA01 | 3,744,574 | AT4G29730 | AT4G29730 | U |
| BnA01 | bnA5325   | 29   | BoC01_4854933_314  |       |           | AT4G29670 | AT4G29670 | U |
| BnA01 | bnA3175   | 30.1 | BoC01_5700363_302  |       |           | AT4G28670 | AT4G28670 | U |
| BnA01 | bnA3176   | 30.1 | BoC01_5910378_284  |       |           | AT2G07170 |           |   |
| BnA01 | bnA1125   | 30.1 | BrA01_3969016_301  | BrA01 | 3,969,016 | AT4G14750 |           |   |
| BnA01 | bnA4825   | 30.1 | BrA01_4027253_301  | BrA01 | 4,027,253 | AT5G38260 |           |   |
| BnA01 | bnA5033   | 30.1 | BrA01_4077993_301  | BrA01 | 4,077,993 | AT4G29010 | AT4G29010 | U |
| BnA01 | bnA1129   | 30.1 | BrA01_4246436_301  | BrA01 | 4,246,436 | AT4G28680 | AT4G28680 | U |
| BnA01 | BEN2      | 31.1 | BrA01_4276372_187  | BrA01 | 4,276,372 | AT4G28610 | AT4G28610 | U |
| BnA01 | BnEMS1012 | 31.1 | BrA01_4276389_211  | BrA01 | 4,276,389 | AT4G28610 | AT4G28610 | U |
| BnA01 | bnA1131   | 32.5 | BrA01_4612731_282  | BrA01 | 4,612,731 | AT4G17890 | AT4G17890 | U |
| BnA01 | bnA5497   | 33.6 | BrA01_5022756_301  | BrA01 | 5,022,756 | AT2G28053 |           |   |
| BnA01 | bnA1142   | 37   | BrA01_5971798_301  | BrA01 | 5,971,798 | AT4G21050 | AT4G21050 | U |
| BnA01 | bnA1145   | 37.3 | BrA01_6379546_301  | BrA01 | 6,379,546 | AT4G21895 | AT4G21895 | U |

|       |          |      |                    |       |            |           |           |   |
|-------|----------|------|--------------------|-------|------------|-----------|-----------|---|
| BnA01 | bnal146  | 37.3 | BrA01_6388281_309  | BrA01 | 6,388,281  | AT5G57800 |           |   |
| BnA01 | bnal147  | 37.3 | BrA01_6502314_301  | BrA01 | 6,502,314  | AT4G22120 | AT4G22120 | U |
| BnA01 | bnal5365 | 37.8 | BrA01_6681885_301  | BrA01 | 6,681,885  | AT4G22540 | AT4G22540 | U |
| BnA01 | BGR65    | 38.3 | BrA01_6684759_104  | BrA01 | 6,684,759  | AT4G22540 | AT4G22540 | U |
| BnA01 | bnal150  | 38.6 | BrA01_6898141_301  | BrA01 | 6,898,141  | AT3G42565 |           |   |
| BnA01 | bnal4633 | 40.8 | BrA01_7399677_301  | BrA01 | 7,399,677  | AT3G45200 |           |   |
| BnA01 | bnal154  | 40.8 | BrA01_7473115_301  | BrA01 | 7,473,115  | AT4G23750 | AT4G23750 | U |
| BnA01 | bnal155  | 40.8 | BrA01_7486801_301  | BrA01 | 7,486,801  | AT1G68750 |           |   |
| BnA01 | bnal156  | 40.8 | BrA01_7530818_301  | BrA01 | 7,530,818  | AT5G43530 |           |   |
| BnA01 | bnal5269 | 40.8 | BrA01_7554524_301  | BrA01 | 7,554,524  | AT4G23950 | AT4G23950 | U |
| BnA01 | bnal157  | 40.8 | BrA01_7721347_301  | BrA01 | 7,721,347  | AT4G24220 | AT4G24220 | U |
| BnA01 | bnal159  | 41.8 | BrA01_7855239_303  | BrA01 | 7,855,239  | AT4G24490 | AT4G24490 | U |
| BnA01 | bnal160  | 41.8 | BrA01_7991655_302  | BrA01 | 7,991,655  | AT4G14030 |           |   |
| BnA01 | bnal168  | 42.4 | BrA01_8514979_301  | BrA01 | 8,514,979  | AT3G59410 |           |   |
| BnA01 | BnEMS57  | 45.6 | BrA01_8639083_251  | BrA01 | 8,639,083  | AT4G26080 | AT4G26080 | U |
| BnA01 | bnal181  | 49.1 | BrA01_9203246_301  | BrA01 | 9,203,246  | AT4G26190 | AT4G26190 | U |
| BnA01 | bnal880  | 53.7 | BrA01_11302933_301 | BrA01 | 11,302,933 | AT2G17370 |           |   |
| BnA01 | bnal202  | 56.9 | BrA01_14804405_301 | BrA01 | 14,804,405 | AT3G48660 | AT3G48660 | M |
| BnA01 | bnal5331 | 56.9 | BrA01_14915561_301 | BrA01 | 14,915,561 | AT3G48810 | AT3G48810 | M |
| BnA01 | Na12-C06 | 61.7 |                    |       |            |           |           |   |
| BnA01 | BGR6     | 65.4 | BrA01_14939760_138 | BrA01 | 14,939,760 | AT3G48900 | AT3G48900 | M |
| BnA01 | bnal205  | 66.3 | BrA01_14960083_301 | BrA01 | 14,960,083 | AT3G48930 | AT3G48930 | M |
| BnA01 | bnal4847 | 67.2 | BrA01_16129488_301 | BrA01 | 16,129,488 | AT2G03720 |           |   |
| BnA01 | bnal5087 | 67.2 | BrA01_16228867_278 | BrA01 | 16,228,867 | AT1G58520 | AT1G58520 | D |
| BnA01 | bnal1952 | 67.2 | BrA01_16253613_301 | BrA01 | 16,253,613 | AT1G59520 | AT1G59520 | D |
| BnA01 | bnal1951 | 67.5 | BrA01_16260435_301 | BrA01 | 16,260,435 | ATCG00430 |           |   |

|       |         |      |                          |       |            |           |           |   |
|-------|---------|------|--------------------------|-------|------------|-----------|-----------|---|
| BnA01 | bnA1949 | 68.9 | BrA01_16433096_275       | BrA01 | 16,433,096 | AT1G59820 | AT1G59820 | D |
| BnA01 | bnA1948 | 68.9 | BrA01_16472423_301       | BrA01 | 16,472,423 | AT5G17690 |           |   |
| BnA01 | bnA1946 | 69.9 | BrA01_16530023_301       | BrA01 | 16,530,023 | AT5G39660 |           |   |
| BnA01 | bnA5381 | 69.9 | BrA01_16945994_301       | BrA01 | 16,945,994 | AT1G53360 |           |   |
| BnA01 | bnA5604 | 69.9 | BrA01_17112397_301       | BrA01 | 17,112,397 | AT1G60830 | AT1G60830 | D |
| BnA01 | bnA1947 | 69.9 | BrScaffold004113_153_300 |       |            | AT1G59910 | AT1G59910 | D |
| BnA01 | bnA1938 | 69.9 | BrA01_17296297_299       | BrA01 | 17,296,297 | AT3G21870 |           |   |
| BnA01 | bnA1216 | 71.8 | BrA01_18097124_301       | BrA01 | 18,097,124 | AT3G56275 |           |   |
| BnA01 | bnA5508 | 72.6 | BoC01_25604906_301       |       |            | AT3G23940 | AT3G23940 | F |
| BnA01 | bnA1215 | 72.6 | BrA01_18102853_269       | BrA01 | 18,102,853 | AT5G49840 |           |   |
| BnA01 | BGR84   | 74.5 | BrA01_19723537_119       | BrA01 | 19,723,537 | AT3G23130 | AT3G23130 | F |
| BnA01 | bnA4621 | 75.2 |                          |       |            | AT1G45020 |           |   |
| BnA01 | bnA1234 | 75.6 | BrA01_20436893_250       | BrA01 | 20,436,893 | AT5G29000 |           |   |
| BnA01 | bnA5510 | 75.6 | BoC01_13892489_301       |       |            |           |           |   |
| BnA01 | bnA1240 | 77.2 | BrA01_21533280_301       | BrA01 | 21,533,280 | AT3G19580 | AT3G19580 | F |
| BnA01 | bnA1227 | 77.8 | BrA01_21715312_301       | BrA01 | 21,715,312 | AT3G19170 | AT3G19170 | F |
| BnA01 | bnA1226 | 77.8 | BrA01_21726916_301       | BrA01 | 21,726,916 | AT3G19130 | AT3G19130 | F |
| BnA01 | bnA5240 | 78.8 | BrA01_22141137_301       | BrA01 | 22,141,137 | AT3G18390 | AT3G18390 | F |
| BnA01 | bnA1242 | 79.4 | BrA01_22680380_255       | BrA01 | 22,680,380 | AT5G25370 |           |   |
| BnA01 | bnA5255 | 81.2 | BrA03_2569659_301        |       |            |           |           |   |
| BnA01 | bnA2684 | 82.8 | BrA01_23024808_206       | BrA01 | 23,024,808 | AT5G63620 |           |   |
| BnA01 | bnA5050 | 83.3 | BrA01_23024808_206       | BrA01 | 23,024,808 | AT5G63620 |           |   |
| BnA01 | bnA1244 | 83.3 | BrA01_23159955_209       | BrA01 | 23,159,955 | AT1G64770 |           |   |
| BnA01 | bnA5184 | 83.3 | BrA01_23169456_302       | BrA01 | 23,169,456 | ATCG00050 |           |   |
| BnA01 | bnA1246 | 83.3 | BrA01_23390600_301       | BrA01 | 23,390,600 | AT5G29231 |           |   |
| BnA01 | bnA1250 | 83.3 | BrA01_23571784_301       | BrA01 | 23,571,784 | AT2G13116 |           |   |

|       |         |       |                             |       |            |           |           |   |
|-------|---------|-------|-----------------------------|-------|------------|-----------|-----------|---|
| BnA01 | BEN68   | 84.6  | BrA01_23659029_106          | BrA01 | 23,659,029 |           |           |   |
| BnA01 | bnA3349 | 85.4  | BoC01_32601699_301          |       |            | AT3G16650 | AT3G16650 | F |
| BnA01 | bnA5513 | 85.4  | BrA01_23718576_301          | BrA01 | 23,718,576 | AT3G15980 | AT3G15980 | F |
| BnA01 | BnGMS87 | 86.2  | BrA01_23784674_221          | BrA01 | 23,784,674 | AT5G21100 |           |   |
| BnA01 | bnA3358 | 86.7  | BoC01_33124503_303          |       |            | AT3G15930 | AT3G15930 | F |
| BnA01 | bnA1260 | 87.2  | BrA01_24487702_301          | BrA01 | 24,487,702 |           |           |   |
| BnA01 | bnA1269 | 88.8  | BoC01_35362787_314          |       |            | AT3G13530 | AT3G13530 | F |
| BnA01 | bnA4831 | 88.8  | BrA01_24694541_172          | BrA01 | 24,694,541 | AT3G05460 |           |   |
| BnA01 | bnA0776 | 88.8  | BoC01_35286677_301          |       |            | AT3G13590 | AT3G13590 | F |
| BnA01 | bnA1277 | 89.8  | BrA01_26384627_301          | BrA01 | 26,384,627 | AT3G62790 |           |   |
| BnA01 | bnA5656 | 89.8  | BrScaffold000164_241494_301 |       |            | AT3G13410 | AT3G13410 | F |
| BnA01 | bnA0344 | 89.8  | BrA01_26442983_301          | BrA01 | 26,442,983 | AT3G01185 | AT3G01185 | F |
| BnA01 | bnA1280 | 90.3  | BrA01_26605007_302          | BrA01 | 26,605,007 | AT2G35630 |           |   |
| BnA01 | bnA1281 | 90.8  | BrA01_26622397_301          | BrA01 | 26,622,397 | AT3G11910 | AT3G11910 | F |
| BnA01 | bnA1293 | 90.9  | BrA01_27159148_301          | BrA01 | 27,159,148 | AT3G11000 | AT3G11000 | F |
| BnA01 | bnA1295 | 91    | BrA01_27389556_298          | BrA01 | 27,389,556 | AT4G04690 |           |   |
| BnA01 | bnA3367 | 91.1  | BoC01_36821459_254          |       |            | AT3G11000 | AT3G11000 | F |
| BnA01 | bnA1287 | 91.7  | BrA01_27855099_301          | BrA01 | 27,855,099 | AT3G07810 | AT3G07810 | F |
| BnA01 | BEN32A  | 95.9  | BrA01_27859602_165          | BrA01 | 27,859,602 | AT3G07790 |           |   |
| BnA01 | bnA0893 | 101.5 | BoScaffold000425_84667_264  |       |            | AT3G02710 | AT3G02710 | F |
| BnA01 | bnA0962 | 101.6 | BoScaffold000425_184083_301 |       |            | AT3G02900 | AT3G02900 | F |
| BnA01 | bnA0963 | 101.7 | BoScaffold000425_184083_301 |       |            | AT3G02900 | AT3G02900 | F |
| BnA01 | bnA5974 | 101.8 | BoScaffold000438_61616_301  |       |            | AT1G53163 |           |   |
| BnA01 | bnA0300 | 102.5 | BrScaffold000191_156554_301 |       |            | AT1G61420 |           |   |
| BnA01 | bnA1291 | 102.6 | BrA01_27926342_301          | BrA01 | 27,926,342 | AT1G36105 |           |   |
| BnA01 | bnA2273 | 102.7 | BrA01_28153164_301          | BrA01 | 28,153,164 | AT3G06490 | AT3G06490 | F |

|       |           |       |                             |       |            |           |           |   |
|-------|-----------|-------|-----------------------------|-------|------------|-----------|-----------|---|
| BnA01 | bna2272   | 102.7 | BrA01_28168240_301          | BrA01 | 28,168,240 | AT3G06470 | AT3G06470 | F |
| BnA01 | Na12-H02  | 104.6 | BrA01_28229113_223          | BrA01 | 28,229,113 | AT3G06270 | AT3G06270 | F |
| BnA01 | BRAS074B  | 105.1 | BrA01_28424481_120          | BrA01 | 28,424,481 | AT4G08960 |           |   |
| BnA02 | BoGMS795  | 0     |                             |       |            |           |           |   |
| BnA02 | OI11-H09A | 0.5   | BrA02_1510618_161           | BrA02 | 1,510,618  | AT5G01400 | AT5G01400 | R |
| BnA02 | sR12095   | 0.5   | BrA02_1598382_324           | BrA02 | 1,598,382  | AT5G02030 | AT5G02030 | R |
| BnA02 | BEN406    | 11.2  |                             |       |            | AT5G19510 | AT5G19510 | R |
| BnA02 | bna5528   | 15.2  | BrA02_4103904_301           | BrA02 | 4,103,904  | AT5G16960 | AT5G16960 | R |
| BnA02 | bna4819   | 16.1  | BoScaffold000328_209205_301 |       |            | AT5G14110 |           |   |
| BnA02 | bna1349   | 17    | BrA02_4120287_301           | BrA02 | 4,120,287  | AT5G17050 | AT5G17050 | R |
| BnA02 | bna3673   | 17    | BoC08_4067834_301           |       |            | AT3G28400 |           |   |
| BnA02 | bna1351   | 17    | BrA02_4180732_301           | BrA02 | 4,180,732  | AT5G17320 | AT5G17320 | R |
| BnA02 | bna5531   | 18.4  | BrA02_5991316_302           | BrA02 | 5,991,316  | AT5G59900 | AT5G59900 | W |
| BnA02 | bna1971   | 18.4  | BrA02_6252346_301           | BrA02 | 6,252,346  | AT5G59070 | AT5G59070 | W |
| BnA02 | bna1367   | 19.2  | BrA02_6466142_299           | BrA02 | 6,466,142  | AT5G58300 | AT5G58300 | W |
| BnA02 | bna1371   | 20.6  | BrA02_6766467_301           | BrA02 | 6,766,467  | AT4G23103 |           |   |
| BnA02 | sN3761B   | 21    | BrA02_6754912_171           | BrA02 | 6,754,912  | AT5G57510 | AT5G57510 | W |
| BnA02 | sR6293    | 21.5  | BrA02_7173113_124           | BrA02 | 7,173,113  | AT5G02880 |           |   |
| BnA02 | bna1374   | 21.9  | BrA02_7236554_297           | BrA02 | 7,236,554  | AT1G05190 |           |   |
| BnA02 | bna5534   | 22.1  | BrA02_7190128_301           | BrA02 | 7,190,128  | AT5G56530 | AT5G56530 | W |
| BnA02 | bna4833   | 22.2  | BrA02_7105284_302           | BrA02 | 7,105,284  | AT4G08910 |           |   |
| BnA02 | bna5910   | 22.3  | BrA02_7275448_301           | BrA02 | 7,275,448  | AT5G56320 | AT5G56320 | W |
| BnA02 | bna3412   | 23.4  | BrA02_7637663_301           | BrA02 | 7,637,663  | AT5G54830 | AT5G54830 | W |
| BnA02 | bna1387   | 23.9  | BrA02_8179342_301           |       |            | AT3G17160 |           |   |
| BnA02 | bna1388   | 23.9  | BrA02_8249688_301           |       |            | AT5G48000 |           |   |
| BnA02 | bna5072   | 24.6  | BrA02_7750536_301           | BrA02 | 7,750,536  | AT5G54510 | AT5G54510 | W |

|       |         |      |                                |       |            |           |           |   |
|-------|---------|------|--------------------------------|-------|------------|-----------|-----------|---|
| BnA02 | bnA1382 | 24.6 | BrA02_7878079_301              | BrA02 | 7,878,079  | AT5G40020 |           |   |
| BnA02 | bnA5119 | 24.6 | BrA02_7881877_301              | BrA02 | 7,881,877  | AT2G23060 |           |   |
| BnA02 | bnA1379 | 26   | BrA02_7756158_301              | BrA02 | 7,756,158  | AT2G16670 |           |   |
| BnA02 | bnA1380 | 26   | BrA02_7788690_301              | BrA02 | 7,788,690  | AT5G54490 | AT5G54490 | W |
| BnA02 | bnA5538 | 27.5 | BrA02_8447213_285              | BrA02 | 8,447,213  | AT5G53060 | AT5G53060 | W |
| BnA02 | bnA1391 | 27.5 | BrScaffold000318_1244_301      |       |            | AT1G52920 |           |   |
| BnA02 | bnA1390 | 27.5 | BoC06_25238316_301             |       |            | AT1G72000 |           |   |
| BnA02 | bnA1393 | 27.5 | BrA02_8625702_301              | BrA02 | 8,625,702  | AT2G15400 |           |   |
| BnA02 | bnA0125 | 27.5 | BrA02_8738403_301              | BrA02 | 8,738,403  | AT5G52300 | AT5G52300 | W |
| BnA02 | bnA3513 | 28.2 | BoScaffold000001_P2_469158_301 |       |            | AT2G18721 |           |   |
| BnA02 | bnA5442 | 28.3 | BrA02_8884562_301              | BrA02 | 8,884,562  | AT2G29940 |           |   |
| BnA02 | bnA1398 | 28.4 | BrA02_8949807_301              | BrA02 | 8,949,807  | AT5G51660 | AT5G51660 | W |
| BnA02 | bnA1401 | 28.5 | BrA02_9281581_303              | BrA02 | 9,281,581  | AT1G43886 |           |   |
| BnA02 | bnA0375 | 29.4 | BrA01_3229012_301              |       |            | AT4G05073 |           |   |
| BnA02 | bnA1698 | 30.7 | BrA02_9421963_300              | BrA02 | 9,421,963  | AT1G65040 | AT1G65040 | E |
| BnA02 | bnA4638 | 30.7 | BrA02_9645918_301              | BrA02 | 9,645,918  | AT5G54980 |           |   |
| BnA02 | bnA1441 | 32.8 | BrA02_10325878_301             | BrA02 | 10,325,878 |           |           |   |
| BnA02 | bnA2864 | 33.1 | BoC01_19115033_293             |       |            | AT3G30235 |           |   |
| BnA02 | BEN281B | 33.6 | BrA02_10444068_202             | BrA02 | 10,444,068 | AT1G67730 | AT1G67730 | E |
| BnA02 | bnA0362 | 36.7 | BrA02_10956748_301             | BrA02 | 10,956,748 | AT5G18450 |           |   |
| BnA02 | bnA1447 | 37.6 | BrA02_11015035_301             | BrA02 | 11,015,035 | AT3G09390 |           |   |
| BnA02 | bnA1445 | 39.4 | BrA02_11183543_301             | BrA02 | 11,183,543 | AT1G68920 | AT1G68920 | E |
| BnA02 | bnA1406 | 39.8 | BrA02_11666536_303             | BrA02 | 11,666,536 | AT1G20240 |           |   |
| BnA02 | bnA1404 | 40.2 | BrA02_11454601_301             | BrA02 | 11,454,601 | AT1G28760 |           |   |
| BnA02 | bnA1407 | 40.6 | BrA02_11750590_301             | BrA02 | 11,750,590 | AT1G70260 | AT1G70260 | E |
| BnA02 | bnA5073 | 41.8 | BrA02_12314392_301             | BrA02 | 12,314,392 | AT5G39680 |           |   |

|       |         |      |                             |       |            |           |           |   |
|-------|---------|------|-----------------------------|-------|------------|-----------|-----------|---|
| BnA02 | bnA5852 | 42.3 | BrA02_12589154_301          | BrA02 | 12,589,154 | AT3G20320 |           |   |
| BnA02 | bnA1418 | 43.2 | BrA02_12688756_301          | BrA02 | 12,688,756 | AT1G72460 | AT1G72460 | E |
| BnA02 | bnA1420 | 43.2 | BrA02_12756742_296          | BrA02 | 12,756,742 | AT1G72530 | AT1G72530 | E |
| BnA02 | bnA0786 | 44.6 | BoC02_18798720_286          |       |            | AT5G48810 |           |   |
| BnA02 | bnA1424 | 44.9 | BrA02_13556242_301          | BrA02 | 13,556,242 | AT1G15460 |           |   |
| BnA02 | BGR87   | 45.7 | BrA02_14212023_120          | BrA02 | 14,212,023 | AT1G76580 | AT1G76580 | E |
| BnA02 | bnA3960 | 62.8 | BoC02_28444056_301          |       |            | AT3G63070 | AT3G63070 | N |
| BnA02 | bnA3438 | 63.1 | BoC02_25050175_278          | BoC02 | 25,050,175 | AT2G37220 |           |   |
| BnA02 | bnA3456 | 63.1 | BoC02_25719601_239          | BoC02 | 25,719,601 | AT3G55610 | AT3G55610 | N |
| BnA02 | bnA4790 | 63.1 | BoC02_27031205_301          | BoC02 | 27,031,205 | AT3G43160 |           |   |
| BnA02 | bnA3269 | 63.1 | BoScaffold000335_230394_301 |       |            | AT3G25020 |           |   |
| BnA02 | bnA3272 | 63.1 | BoScaffold000335_100012_301 |       |            | AT2G31040 |           |   |
| BnA02 | bnA3496 | 63.6 | BoC02_27104488_302          | BoC02 | 27,104,488 | AT2G18850 | AT2G18850 | H |
| BnA02 | bnA4130 | 63.6 | BoC08_9033619_300           |       |            | AT2G14370 | AT2G14370 | H |
| BnA02 | bnA3281 | 63.8 | BoC07_37417143_299          |       |            | AT2G11410 | AT2G11410 | H |
| BnA02 | bnA3280 | 63.9 | BoC07_37454319_301          |       |            | AT5G65920 | AT5G65920 | X |
| BnA02 | bnA3476 | 64.2 | BoC02_26310873_301          | BoC02 | 26,310,873 | AT5G63090 | AT5G63090 | X |
| BnA02 | bnA5838 | 64.2 | BoC07_36658059_301          |       |            | AT5G51360 | AT5G51360 | W |
| BnA02 | bnA3965 | 64.7 | BoC02_28292620_301          | BoC02 | 28,292,620 | AT5G49870 | AT5G49870 | W |
| BnA02 | bnA3541 | 65.2 | BoC02_31762247_301          |       |            | AT5G49790 | AT5G49790 | W |
| BnA02 | bnA3487 | 65.9 | BoC02_26757922_301          | BoC02 | 26,757,922 | AT5G45230 | AT5G45230 | W |
| BnA02 | bnA3284 | 66.4 | BoC09_27155188_301          |       |            | AT1G34570 | AT1G34570 | B |
| BnA02 | bnA3296 | 66.4 | BoC07_36508723_301          |       |            | AT1G26310 | AT1G26310 | B |
| BnA02 | bnA3962 | 67.2 | BoC02_28386263_301          | BoC02 | 28,386,263 |           |           |   |
| BnA02 | bnA3964 | 67.2 | BoC02_28311847_301          | BoC02 | 28,311,847 | AT1G12680 | AT1G12680 | A |
| BnA02 | bnA3470 | 67.6 | BoC03_41885114_301          |       |            | AT1G07940 | AT1G07940 | A |



|       |         |      |                             |       |            |           |           |   |
|-------|---------|------|-----------------------------|-------|------------|-----------|-----------|---|
| BnA02 | bnA3959 | 67.9 | BoC02_28482686_301          | BoC02 | 28,482,686 | AT5G35413 | AT5G35413 | S |
| BnA02 | bnA5837 | 68.2 | BoC07_37452969_301          |       |            | AT5G35205 | AT5G35205 | S |
| BnA02 | bnA1021 | 68.5 | BoC02_28822177_301          | BoC02 | 28,822,177 | AT5G28145 |           |   |
| BnA02 | bnA3298 | 68.8 | BoC06_1908498_229           |       |            | AT5G10480 | AT5G10480 | R |
| BnA02 | bnA5846 | 71.4 | BoC02_29084192_301          |       |            | AT5G09463 | AT5G09463 | R |
| BnA02 | bnA3468 | 74.6 | BoC02_26067961_300          | BoC02 | 26,067,961 | AT5G03280 | AT5G03280 | R |
| BnA02 | bnA3277 | 74.6 | BoC07_37555131_301          |       |            | AT5G02390 | AT5G02390 | R |
| BnA02 | bnA3240 | 74.9 | BoC02_29075223_301          |       |            | AT4G38760 | AT4G38760 | U |
| BnA02 | bnA3457 | 75.2 | BoC02_25741664_301          | BoC02 | 25,741,664 | AT4G29420 | AT4G29420 | U |
| BnA02 | bnA3290 | 75.2 | BoC07_36672987_301          |       |            | AT4G26190 | AT4G26190 | U |
| BnA02 | sR10417 | 75.5 | BrA02_17125071_227          |       |            | AT4G23900 | AT4G23900 | U |
| BnA02 | bnA3467 | 76   | BoC02_26044159_301          | BoC02 | 26,044,159 | AT4G10300 | AT4G10300 | P |
| BnA02 | BGR52   | 76.5 | BrA02_17526120_144          |       |            | AT4G10140 | AT4G10140 | P |
| BnA02 | bnA3289 | 76.8 | BoC07_36714679_301          |       |            | AT4G07664 | AT4G07664 | P |
| BnA02 | bnA3263 | 76.8 | BrA05_8520929_145           |       |            | AT4G06630 | AT4G06630 | P |
| BnA02 | bnA3530 | 77.9 | BrA10_62140_301             |       |            | AT4G06626 | AT4G06626 | P |
| BnA02 | bnA3255 | 78.6 | BoC02_23357144_301          |       |            | AT4G04620 | AT4G04620 | O |
| BnA02 | bnA0612 | 79.3 | BoScaffold000233_755201_170 |       |            | AT4G03390 | AT4G03390 | O |
| BnA02 | bnA3956 | 80.2 | BoC02_28779755_301          | BoC02 | 28,779,755 | AT5G44020 | AT5G44020 | V |
| BnA02 | bnA3955 | 80.2 | BoC02_28805541_301          | BoC02 | 28,805,541 | AT5G44070 | AT5G44070 | V |
| BnA02 | bnA3548 | 80.8 | BoC02_31576602_301          |       |            | AT4G32330 | AT4G32330 | P |
| BnA02 | bnA3474 | 81.4 | BoC02_26265513_301          | BoC02 | 26,265,513 | AT2G01140 |           |   |
| BnA02 | bnA4720 | 81.4 | BoC02_21299338_301          |       |            | AT4G23800 | AT4G23800 | P |
| BnA02 | bnA3257 | 81.4 | BoC02_23381964_301          | BoC02 | 23,381,964 | AT3G49130 |           |   |
| BnA02 | bnA3491 | 83.3 | BoC02_26921898_264          | BoC02 | 26,921,898 | AT4G23070 | AT4G23070 | P |
| BnA02 | bnA3291 | 84.6 | BoC07_36664505_301          |       |            | AT2G39130 |           |   |

|       |         |      |                            |       |            |           |           |   |
|-------|---------|------|----------------------------|-------|------------|-----------|-----------|---|
| BnA02 | bna3493 | 84.7 | BoC02_27046229_278         | BoC02 | 27,046,229 | AT3G33004 |           |   |
| BnA02 | bna3256 | 84.9 | BoC03_32323085_302         |       |            | AT4G22130 | AT4G22130 | P |
| BnA02 | bna3453 | 85.2 | BoC07_25305432_301         |       |            | AT3G29180 |           |   |
| BnA02 | bna4704 | 85.2 | BoScaffold000419_82799_291 |       |            | AT1G36670 |           |   |
| BnA02 | bna3492 | 85.2 | BoC08_13180288_301         |       |            | AT5G46240 |           |   |
| BnA02 | bna3484 | 85.2 | BoC02_26666221_258         | BoC02 | 26,666,221 |           |           |   |
| BnA02 | bna3452 | 85.3 | BoC02_25442729_300         | BoC02 | 25,442,729 | AT4G21680 | AT4G21680 | P |
| BnA02 | bna3443 | 85.4 | BoC02_25146228_302         | BoC02 | 25,146,228 | AT5G56270 |           |   |
| BnA02 | bna3449 | 85.5 | BoC02_25222313_294         | BoC02 | 25,222,313 | AT1G71970 |           |   |
| BnA02 | bna5858 | 85.6 | BrA03_21378186_130         |       |            | AT5G01110 |           |   |
| BnA02 | bna3279 | 85.7 | BoC07_37488062_301         | BoC07 | 37,488,062 | AT4G12290 | AT4G12290 | P |
| BnA02 | bna3282 | 85.8 | BoC07_37335580_301         | BoC07 | 37,335,580 | AT5G10940 |           |   |
| BnA02 | bna3287 | 85.9 | BoC07_36847163_301         | BoC07 | 36,847,163 | AT4G11910 | AT4G11910 | P |
| BnA02 | bna3292 | 86   | BoC07_36597360_301         | BoC07 | 36,597,360 | AT3G59550 |           |   |
| BnA02 | bna5840 | 86.1 | BoC06_1845858_301          |       |            | AT4G11560 | AT4G11560 | P |
| BnA02 | bna3463 | 86.1 | BoC02_25884580_301         |       |            |           |           |   |
| BnA02 | bna3957 | 86.4 | BoC02_28752066_301         | BoC02 | 28,752,066 | AT3G09970 |           |   |
| BnA02 | bna0734 | 86.4 | BoC02_29924834_311         | BoC02 | 29,924,834 | AT3G44713 |           |   |
| BnA02 | bna3536 | 86.7 | BoC02_31889051_301         | BoC02 | 31,889,051 | AT2G03440 |           |   |
| BnA02 | bna3535 | 87.1 | BoC02_31914762_301         | BoC02 | 31,914,762 | AT1G31540 |           |   |
| BnA02 | bna1053 | 88   |                            |       |            | AT3G61790 |           |   |
| BnA02 | bna3529 | 88.9 | BrA10_89244_100            |       |            | AT4G06561 | AT4G06561 | P |
| BnA02 | bna3551 | 90.6 | BoC02_31483657_301         | BoC02 | 31,483,657 | AT2G07420 |           |   |
| BnA02 | bna0846 | 90.6 | BoC02_29637108_269         | BoC02 | 29,637,108 | AT4G02170 |           |   |
| BnA02 | bna3297 | 92.3 | BoC07_36458580_302         |       |            | AT3G43083 | AT3G43083 | L |
| BnA02 | bna3478 | 92.3 | BoC02_26377496_250         |       |            | AT1G37040 |           |   |

|       |         |       |                                 |       |            |           |           |   |
|-------|---------|-------|---------------------------------|-------|------------|-----------|-----------|---|
| BnA02 | bnA3451 | 93.1  | BoC02_25351109_301              |       |            | AT5G25920 |           |   |
| BnA02 | bnA3461 | 93.6  | BoC06_14216429_301              |       |            | AT3G30836 | AT3G30836 | L |
| BnA02 | bnA3266 | 93.6  | BoScaffold000335_300181_301     |       |            | AT5G02230 |           |   |
| BnA02 | bnA5859 | 93.9  | BoScaffold000003_P1_338520_297  |       |            | AT3G30716 | AT3G30716 | L |
| BnA02 | bnA1031 | 93.9  | BoScaffold000512_57088_141      |       |            | AT5G09350 |           |   |
| BnA02 | bnA3446 | 93.9  | BoC02_25244717_155              |       |            | AT5G33175 |           |   |
| BnA02 | bnA3498 | 93.9  | BoC02_27193907_301              |       |            | AT3G01513 |           |   |
| BnA02 | bnA3355 | 94.7  | BrA02_4914943_269               |       |            | AT3G45253 | AT3G45253 | M |
| BnA02 | bnA0269 | 96.4  | BoScaffold000013_P2_1538530_301 |       |            | AT1G64970 |           |   |
| BnA02 | bnA0870 | 96.4  | BoScaffold000013_P2_1854300_287 |       |            | AT3G45850 | AT3G45850 | M |
| BnA02 | bnA4751 | 96.8  | BoScaffold000180_336494_302     |       |            | AT4G34890 |           |   |
| BnA02 | bnA0267 | 96.8  | BoScaffold000013_P2_2007823_301 |       |            | AT4G13730 |           |   |
| BnA02 | bnA0265 | 96.8  | BoScaffold000013_P2_2445372_302 |       |            | AT5G14720 | AT5G14720 | R |
| BnA02 | bnA0858 | 98.4  | BoScaffold000393_56192_294      |       |            | AT5G18540 | AT5G18540 | R |
| BnA02 | bnA3963 | 98.8  | BoC02_28352422_239              | BoC02 | 28,352,422 | AT1G24070 | AT1G24070 | B |
| BnA02 | bnA0464 | 99.3  | BoC02_23932652_301              |       |            | AT1G37040 | AT1G37040 | B |
| BnA02 | bnA5237 | 99.3  | BoC07_36755053_277              |       |            | AT1G42698 | AT1G42698 | C |
| BnA02 | bnA4705 | 99.6  | BoC02_31504241_301              | BoC02 | 31,504,241 | AT1G45010 | AT1G45010 | C |
| BnA02 | bnA3258 | 99.9  | BoC02_23426511_301              |       |            | AT3G45050 | AT3G45050 | M |
| BnA02 | bnA3436 | 100.2 | BoScaffold000031_P1_149878_301  |       |            | AT3G31356 | AT3G31356 | M |
| BnA02 | bnA3460 | 100.2 | BoC02_25833179_301              |       |            | AT5G52110 | AT5G52110 | W |
| BnA02 | bnA3549 | 100.5 | BoC07_32620548_299              |       |            | AT5G58330 | AT5G58330 | W |
| BnA02 | bnA3485 | 100.8 | BoC02_26694404_299              |       |            | AT2G38185 | AT2G38185 | J |
| BnA02 | bnA3533 | 101.6 | BoC05_9768588_287               |       |            | AT2G47490 | AT2G47490 | J |
| BnA02 | bnA3444 | 102.4 | BoC02_25162106_301              |       |            | AT4G03450 | AT4G03450 | R |
| BnA02 | bnA3490 | 102.4 | BoC02_26900603_297              |       |            | AT4G04157 | AT4G04157 | R |

|       |         |       |                             |       |            |           |           |     |
|-------|---------|-------|-----------------------------|-------|------------|-----------|-----------|-----|
| BnA02 | bna3267 | 102.5 | BoScaffold000335_309595_223 |       |            | AT5G35910 |           |     |
| BnA02 | bna3479 | 102.6 | BoC02_26439434_295          |       |            | AT4G04316 | AT4G04316 | O   |
| BnA02 | bna3531 | 103.7 | BoC05_7783846_301           |       |            | AT4G06604 | AT4G06604 | O   |
| BnA02 | bna3546 | 104   | BoC02_31630315_301          | BoC02 | 31,630,315 | AT5G46105 |           |     |
| BnA02 | bna3544 | 104   | BoC02_31689351_301          | BoC02 | 31,689,351 | ATMG00610 |           |     |
| BnA02 | bna3539 | 104   | BoC02_31838722_301          | BoC02 | 31,838,722 | AT3G59280 | AT3G59280 | N   |
| BnA02 | bna5839 | 104.6 | BoC07_36544565_301          |       |            | AT3G60170 | AT3G60170 | N   |
| BnA02 | bna0621 | 105.9 | BoC02_35051270_295          | BoC02 | 35,051,270 | AT1G70250 |           |     |
| BnA02 | bna4764 | 106.2 | BoC05_8530889_302           |       |            | AT5G62540 |           |     |
| BnA02 | bna3528 | 106.5 | BoC02_22655560_300          |       |            | AT3G62475 | AT3G62475 | N   |
| BnA02 | bna4706 | 107.1 | BoC02_31474599_301          |       |            | AT2G13860 | AT2G13860 | G/H |
| BnA02 | bna5969 | 107.4 | BoC02_25568930_301          |       |            | AT1G04590 |           |     |
| BnA02 | bna3286 | 107.4 | BoC07_36909176_301          |       |            | AT4G11980 |           |     |
| BnA02 | bna3294 | 107.4 | BoC07_36545063_301          |       |            | AT2G11950 | AT2G11950 | G/H |
| BnA02 | bna3958 | 107.7 | BoC02_28569158_301          |       |            | AT2G11720 | AT2G11720 | G/H |
| BnA02 | bna5824 | 108.5 | BoC01_11317620_301          |       |            | AT4G25030 |           |     |
| BnA02 | bna4881 | 108.8 | BoC07_36869769_222          |       |            | AT3G02930 | AT3G02930 | F   |
| BnA02 | bna3450 | 109.1 | BoC02_25309091_301          |       |            |           |           |     |
| BnA02 | bna3462 | 109.1 | BoC02_25869796_301          |       |            | AT3G10180 | AT3G10180 | F   |
| BnA02 | bna0540 | 110.5 | BoC02_35600452_301          | BoC02 | 35,600,452 | AT2G03080 | AT2G03080 | K   |
| BnA02 | BGO153  | 112.1 | BrA02_22858298_238          |       |            | AT3G25910 |           |     |
| BnA02 | bna3552 | 118.4 | BoC02_29369413_301          |       |            | AT5G38370 |           |     |
| BnA02 | bna0519 | 118.4 | BoC07_18065200_298          |       |            | AT1G26310 |           |     |
| BnA02 | bna0587 | 119.8 | BoC02_36701272_301          | BoC02 | 36,701,272 | AT2G03810 | AT2G03810 | K   |
| BnA02 | bna0743 | 122.8 | BoC02_43650063_300          |       |            | AT3G29642 |           |     |
| BnA02 | BEN189A | 123.7 |                             |       |            |           |           |     |

|       |          |       |                                |       |            |           |           |   |
|-------|----------|-------|--------------------------------|-------|------------|-----------|-----------|---|
| BnA02 | CB10022B | 133.6 |                                |       |            |           |           |   |
| BnA02 | BrGMS363 | 135.2 | BrA02_27738746_153             |       |            | AT5G35880 |           |   |
| BnA02 | bnA1514  | 135.5 | BrA02_27812564_301             |       |            | AT5G66200 | AT5G66200 | X |
| BnA02 | bnA3571  | 136.6 | BoC02_41705763_301             | BoC02 | 41,705,763 | AT5G65205 | AT5G65205 | X |
| BnA02 | bnA3565  | 137.4 | BoScaffold000121_P2_789519_301 |       |            | AT5G63990 | AT5G63990 | X |
| BnA02 | bnA3564  | 138.2 | BoScaffold000121_P2_775141_301 |       |            | AT5G63940 | AT5G63940 | X |
| BnA02 | bnA3568  | 138.2 | BrA02_27439547_301             |       |            | AT5G65470 | AT5G65470 | X |
| BnA02 | bnA3569  | 138.5 | BoC02_41757926_287             | BoC02 | 41,757,926 | AT3G52100 |           |   |
| BnA02 | bnA0558  | 138.8 | BoScaffold000121_P2_271615_301 |       |            | AT5G62680 | AT5G62680 | X |
| BnA02 | bnA3566  | 142.5 | BoScaffold000514_31276_301     |       |            | AT5G66190 | AT5G66190 | X |
| BnA02 | BEN349   | 144.8 |                                |       |            |           |           |   |
| BnA03 | sN2032   | 0     |                                |       |            |           |           |   |
| BnA03 | bnA0051  | 0.3   | BoScaffold000091_1664085_301   |       |            | AT5G61850 |           |   |
| BnA03 | bnA3560  | 0.3   | BoScaffold000407_6294_301      |       |            | AT5G28776 |           |   |
| BnA03 | bnA0288  | 0.3   | BoC03_32383728_301             | BoC03 | 32,383,728 | AT4G39910 |           |   |
| BnA03 | bnA3780  | 4.9   | BoC03_40477244_304             | BoC03 | 40,477,244 | AT5G52220 |           |   |
| BnA03 | bnA3779  | 5.9   | BoC03_40489273_301             | BoC03 | 40,489,273 | AT1G26120 | AT1G26120 | B |
| BnA03 | CALSSRB  | 5.9   |                                |       |            | AT1G26310 | AT1G26310 | B |
| BnA03 | bnA3791  | 6     | BoC03_39863170_301             | BoC03 | 39,863,170 | AT2G30690 |           |   |
| BnA03 | bnA3790  | 6.1   | BoC03_39888365_301             | BoC03 | 39,888,365 | AT4G27885 |           |   |
| BnA03 | bnA5949  | 6.2   | BoC03_40197638_301             | BoC03 | 40,197,638 | AT1G75750 |           |   |
| BnA03 | bnA3789  | 6.3   | BrA06_10261885_283             |       |            | AT5G38700 |           |   |
| BnA03 | bnA3782  | 6.3   | BrA08_17627997_303             |       |            | AT1G26360 | AT1G26360 | B |
| BnA03 | bnA3778  | 6.3   | BoC03_40501352_301             | BoC03 | 40,501,352 | AT5G37400 |           |   |
| BnA03 | bnA3777  | 6.3   | BoC03_40530678_301             | BoC03 | 40,530,678 | AT5G03890 |           |   |
| BnA03 | bnA3775  | 6.3   | BoC03_40591901_303             | BoC03 | 40,591,901 | AT4G32714 |           |   |

|       |           |      |                                 |       |            |  |           |           |
|-------|-----------|------|---------------------------------|-------|------------|--|-----------|-----------|
| BnA03 | BoGMS819  | 9.1  |                                 |       |            |  |           |           |
| BnA03 | BGO120    | 13.4 |                                 |       |            |  | AT5G37680 |           |
| BnA03 | bnA0738   | 14.1 | BoC06_4218118_188               |       |            |  | AT1G27620 | AT1G27620 |
| BnA03 | bnA0639   | 14.8 | BoC03_43830330_301              | BoC03 | 43,830,330 |  | AT1G27980 | AT1G27980 |
| BnA03 | bnA0583   | 18.9 | BoC03_44543356_301              | BoC03 | 44,543,356 |  | AT1G28850 | AT1G28850 |
| BnA03 | bnA2666   | 19.2 | BrA08_16479209_192              |       |            |  | AT1G30130 | AT1G30130 |
| BnA03 | BoGMS680  | 21.2 |                                 |       |            |  |           |           |
| BnA03 | bnA5138   | 21.7 | BrA08_16478870_298              |       |            |  | AT1G30130 | AT1G30130 |
| BnA03 | bnA3811   | 22.2 | BoC03_45939776_300              | BoC03 | 45,939,776 |  | AT3G26480 |           |
| BnA03 | BoGMS154  | 22.5 |                                 |       |            |  |           |           |
| BnA03 | bnA3810   | 24.1 | BoC03_46851701_301              | BoC03 | 46,851,701 |  | AT4G38060 | AT4G38060 |
| BnA03 | bnA3809   | 24.1 | BoC03_46882078_301              | BoC03 | 46,882,078 |  | AT4G37980 | AT4G37980 |
| BnA03 | bnA5847   | 24.1 | BoC03_46968674_301              | BoC03 | 46,968,674 |  | AT4G37930 | AT4G37930 |
| BnA03 | bnA3783   | 25.2 | BoC03_40257094_301              |       |            |  | AT4G06510 |           |
| BnA03 | bnA4713   | 27.9 |                                 |       |            |  | AT4G28640 |           |
| BnA03 | bnA3807   | 27.9 | BoC03_47298054_301              | BoC03 | 47,298,054 |  | AT4G37560 | AT4G37560 |
| BnA03 | bnA3806   | 27.9 | BoC03_47311414_301              | BoC03 | 47,311,414 |  | AT2G05980 |           |
| BnA03 | bnA3805   | 27.9 | BoC03_47417434_295              | BoC03 | 47,417,434 |  | AT2G16440 |           |
| BnA03 | bnA3803   | 27.9 | BoC03_47499541_300              | BoC03 | 47,499,541 |  | AT1G14660 |           |
| BnA03 | bnA4962   | 27.9 | BoC03_47616595_270              | BoC03 | 47,616,595 |  | AT4G36930 | AT4G36930 |
| BnA03 | bnA3804   | 27.9 | BoScaffold000009_P1_1530670_280 |       |            |  | AT5G37150 |           |
| BnA03 | bnA0078   | 27.9 | BoC03_47610468_156              | BoC03 | 47,610,468 |  | AT1G30070 |           |
| BnA03 | bnA0146   | 27.9 | BoC03_47617425_301              | BoC03 | 47,617,425 |  | AT3G31442 |           |
| BnA03 | BoGMS1295 | 28.2 |                                 |       |            |  |           |           |
| BnA03 | bnA3802   | 29.3 | BoC03_47584059_280              | BoC03 | 47,584,059 |  | AT5G28490 | AT5G28490 |
| BnA03 | bnA3801   | 29.3 | BoC03_47620248_301              | BoC03 | 47,620,248 |  | AT4G28540 |           |

|       |            |      |                             |       |            |           |           |   |
|-------|------------|------|-----------------------------|-------|------------|-----------|-----------|---|
| BnA03 | bnA4714    | 29.3 | BoC03_47341746_301          | BoC03 | 47,341,746 | AT5G29646 | AT5G29646 | Q |
| BnA03 | bnA3800    | 29.3 | BoC03_47645315_307          | BoC03 | 47,645,315 | AT5G13181 |           |   |
| BnA03 | bnA3394    | 47.4 | BoScaffold000098_115349_301 |       |            | AT2G05610 |           |   |
| BnA03 | BEN123     | 48.5 | BrA03_6449351_263           |       |            | AT5G52380 | AT5G52380 | W |
| BnA03 | BN12AB     | 49.3 | BrA03_6265845_277           |       |            | AT5G53280 | AT5G53280 | W |
| BnA03 | bnA3612    | 50.3 | BoC03_7268049_303           | BoC03 | 7,268,049  | AT1G16140 |           |   |
| BnA03 | bnA3613    | 50.6 | BrA03_6261112_302           |       |            | AT4G14350 |           |   |
| BnA03 | bnA3614    | 51.6 | BoC03_7073696_301           | BoC03 | 7,073,696  | AT4G17520 |           |   |
| BnA03 | bnA3615    | 51.6 | BoC03_6946602_301           | BoC03 | 6,946,602  | AT5G53740 | AT5G53740 | W |
| BnA03 | bnA3616    | 51.9 | BoC03_6931807_301           | BoC03 | 6,931,807  | AT3G62060 |           |   |
| BnA03 | bnA4964    | 51.9 | BoC03_7009435_301           | BoC03 | 7,009,435  | AT5G27680 |           |   |
| BnA03 | bnA3627    | 55.2 | BoC03_6535141_301           | BoC03 | 6,535,141  | AT1G53070 |           |   |
| BnA03 | bnA3628    | 56.3 | BoC03_6513447_305           | BoC03 | 6,513,447  | AT5G55000 | AT5G55000 | W |
| BnA03 | bnA3629    | 56.3 | BoC03_6491259_301           | BoC03 | 6,491,259  | AT5G55045 | AT5G55045 | W |
| BnA03 | BEN190A    | 60   |                             |       |            | AT5G55860 | AT5G55860 | W |
| BnA03 | Na14-E02   | 61.1 |                             |       |            |           |           |   |
| BnA03 | OI10-D03C  | 68.4 |                             |       |            |           |           |   |
| BnA03 | BoGMS1464A | 72.1 |                             |       |            |           |           |   |
| BnA03 | BGO125     | 72.1 |                             |       |            | AT5G18400 |           |   |
| BnA03 | bnA3603    | 74.5 | BoC03_4914984_300           | BoC03 | 4,914,984  | AT5G60790 |           |   |
| BnA03 | bnA3582    | 75.1 | BrA03_4102152_300           |       |            | AT5G20680 | AT5G20680 | R |
| BnA03 | bnA3588    | 76.2 | BoC03_4552667_284           | BoC03 | 4,552,667  |           |           |   |
| BnA03 | bnA3593    | 77.1 | BoC03_4170187_301           | BoC03 | 4,170,187  | AT5G19990 | AT5G19990 | R |
| BnA03 | bnA5036    | 78.4 | BoC03_3574955_301           | BoC03 | 3,574,955  | AT5G18010 | AT5G18010 | R |
| BnA03 | bnA4738    | 80.5 | BoC03_2272422_301           | BoC03 | 2,272,422  | AT5G13550 | AT5G13550 | R |
| BnA03 | bnA5481    | 80.8 | BoC03_2042670_301           | BoC03 | 2,042,670  | AT5G65650 |           |   |

|       |           |       |                    |       |            |           |           |   |
|-------|-----------|-------|--------------------|-------|------------|-----------|-----------|---|
| BnA03 | bnA5431   | 80.8  | BrA03_2339872_263  |       |            | AT5G12950 | AT5G12950 | R |
| BnA03 | bnA1289   | 80.8  | BoC01_20781518_301 |       |            | AT5G27680 |           |   |
| BnA03 | bnA3689   | 82    | BoC03_1724642_215  | BoC03 | 1,724,642  | AT5G09390 | AT5G09390 | R |
| BnA03 | bnA3688   | 82    | BoC03_1704921_301  | BoC03 | 1,704,921  | AT5G08790 | AT5G08790 | R |
| BnA03 | bnA3687   | 82.4  | BoC03_1692240_301  | BoC03 | 1,692,240  | AT5G08630 | AT5G08630 | R |
| BnA03 | bnA3685   | 84.6  | BrA03_1485228_301  |       |            | AT5G08280 | AT5G08280 | R |
| BnA03 | bnA3681   | 84.6  | BoC03_1256326_301  | BoC03 | 1,256,326  | AT5G07170 | AT5G07170 | R |
| BnA03 | bnA0107   | 86.2  | BoC03_24221_231    | BoC03 | 24,221     | AT5G02030 | AT5G02030 | R |
| BnA03 | bnA0197   | 87.7  | BrA03_80381_301    |       |            | AT5G01640 | AT5G01640 | R |
| BnA03 | bnA0198   | 88    | BrA03_135000_254   |       |            | AT5G01365 | AT5G01365 | R |
| BnA03 | BoGMS1201 | 90.9  |                    |       |            |           |           |   |
| BnA03 | BoGMS1373 | 91.5  |                    |       |            |           |           |   |
| BnA03 | BoGMS1320 | 94    |                    |       |            |           |           |   |
| BnA03 | BRMS-006  | 98.3  |                    |       |            |           |           |   |
| BnA03 | BrEMS993  | 100.5 |                    |       |            |           |           |   |
| BnA03 | BrGMS679  | 102.4 | BrA03_43587_209    |       |            | AT1G66020 |           |   |
| BnA03 | BRMS-008  | 104.1 | BrA03_53344_165    |       |            | AT3G27390 |           |   |
| BnA03 | sR121371A | 106.7 | BrA03_1699524_355  |       |            | AT5G09850 |           |   |
| BnA03 | BoGMS1307 | 110.6 |                    |       |            |           |           |   |
| BnA03 | CB10413   | 132.8 | BrA03_28648208_215 | BrA03 | 28,648,208 | AT1G05080 |           |   |
| BnA03 | bnA1538   | 135   | BrA03_28222246_301 | BrA03 | 28,222,246 | AT4G31320 | AT4G31320 | U |
| BnA03 | bnA1542   | 135   | BrA03_27821377_289 | BrA03 | 27,821,377 | AT1G06690 |           |   |
| BnA03 | bnA1545   | 135   | BrA03_27612941_301 | BrA03 | 27,612,941 | AT5G42190 |           |   |
| BnA03 | BGR54     | 135.8 | BrA03_28268108_129 | BrA03 | 28,268,108 |           |           |   |
| BnA03 | BrGMS509  | 136.6 | BrA03_27239138_278 | BrA03 | 27,239,138 | AT4G02075 |           |   |
| BnA03 | bnA5278   | 137.3 | BrA03_27399085_301 | BrA03 | 27,399,085 | AT1G66750 |           |   |



|       |            |       |                    |       |            |           |           |   |
|-------|------------|-------|--------------------|-------|------------|-----------|-----------|---|
| BnA03 | bnA5279    | 137.3 | BrA03_27181901_301 | BrA03 | 27,181,901 | AT1G35146 |           |   |
| BnA03 | bnA1546    | 137.6 | BrA03_27561648_301 | BrA03 | 27,561,648 | AT4G30074 | AT4G30074 | U |
| BnA03 | bnA1548    | 137.6 | BrA03_27445975_306 | BrA03 | 27,445,975 | AT4G29790 | AT4G29790 | U |
| BnA03 | bnA1549    | 137.9 | BrA03_27385091_301 | BrA03 | 27,385,091 | AT5G26120 |           |   |
| BnA03 | bnA1551    | 138.4 | BrA03_27104883_301 | BrA03 | 27,104,883 | AT4G28890 | AT4G28890 | U |
| BnA03 | bnA1552    | 139.5 | BrA03_26637960_298 | BrA03 | 26,637,960 | AT4G27657 | AT4G27657 | U |
| BnA03 | bnA1553    | 139.5 | BrA03_26608007_293 | BrA03 | 26,608,007 | AT1G37070 |           |   |
| BnA03 | bnA1802    | 158.7 | BrA03_501255_301   | BrA03 | 501,255    | AT5G38150 |           |   |
| BnA03 | Na10-G10   | 160.1 | BrA03_672353_135   | BrA03 | 672,353    | AT5G04150 | AT5G04150 | R |
| BnA03 | bnA5585    | 162   | BrA03_1596241_300  | BrA03 | 1,596,241  | AT5G08570 | AT5G08570 | R |
| BnA03 | sR12137IB  | 162.3 | BrA03_1699524_355  | BrA03 | 1,699,524  | AT5G09850 | AT5G09850 | R |
| BnA03 | BEN320     | 162.8 |                    |       |            | AT5G12120 |           |   |
| BnA03 | BoGMS539   | 164.7 | BrA03_1821839_183  | BrA03 | 1,821,839  | AT5G10470 | AT5G10470 | R |
| BnA03 | BGO029     | 166.6 | BrA03_3156872_138  | BrA03 | 3,156,872  | AT5G16500 | AT5G16500 | R |
| BnA03 | BoGMS1464B | 167.4 |                    |       |            |           |           |   |
| BnA03 | bnA1748    | 170.8 | BrA03_4257090_301  | BrA03 | 4,257,090  | AT5G22090 | AT5G22090 | R |
| BnA03 | bnA5581    | 170.8 | BrA03_4339043_301  | BrA03 | 4,339,043  | AT5G22450 | AT5G22450 | R |
| BnA03 | bnA1747    | 170.8 | BrA03_4399435_301  | BrA03 | 4,399,435  | AT5G22760 | AT5G22760 | R |
| BnA03 | bnA1743    | 173.9 | BrA03_5006694_301  | BrA03 | 5,006,694  | AT5G58300 | AT5G58300 | W |
| BnA03 | bnA1741    | 173.9 | BrA03_5083348_301  | BrA03 | 5,083,348  | AT5G57800 | AT5G57800 | W |
| BnA03 | bnA0462    | 174.4 | BoC03_5872410_301  |       |            | AT5G57500 | AT5G57500 | W |
| BnA03 | bnA1740    | 174.9 | BrA03_5160080_301  | BrA03 | 5,160,080  | AT5G57590 | AT5G57590 | W |
| BnA03 | bnA1738    | 176.6 | BrA03_5415096_301  | BrA03 | 5,415,096  | AT5G56530 | AT5G56530 | W |
| BnA03 | bnA1736    | 176.6 | BrA03_5523389_301  | BrA03 | 5,523,389  | AT5G56250 | AT5G56250 | W |
| BnA03 | BEN190B    | 177.3 |                    |       |            | AT5G55860 | AT5G55860 | W |
| BnA03 | bnA1730    | 178.4 | BrA03_6018284_301  | BrA03 | 6,018,284  | AT5G54170 | AT5G54170 | W |

|       |           |       |                   |       |           |           |           |   |
|-------|-----------|-------|-------------------|-------|-----------|-----------|-----------|---|
| BnA03 | BN12AA    | 179.2 | BrA03_6265845_277 | BrA03 | 6,265,845 | AT5G53280 | AT5G53280 | W |
| BnA03 | BEN251    | 179.2 | BrA03_6283089_162 | BrA03 | 6,283,089 | AT5G53280 | AT5G53280 | W |
| BnA03 | bnA1727   | 179.7 | BrA03_6286513_301 | BrA03 | 6,286,513 | AT5G53260 | AT5G53260 | W |
| BnA03 | BnEMS1084 | 181.6 | BrA03_6289126_377 | BrA03 | 6,289,126 | AT5G53220 | AT5G53220 | W |
| BnA03 | bnA5580   | 183.5 | BrA03_6423348_301 | BrA03 | 6,423,348 | AT5G65660 |           |   |
| BnA03 | bnA1722   | 183.8 | BrA03_6758687_302 | BrA03 | 6,758,687 | AT4G06634 |           |   |
| BnA03 | bnA1717   | 184.9 | BrA03_7094848_303 | BrA03 | 7,094,848 | AT4G02910 |           |   |
| BnA03 | bnA1716   | 185.6 | BrA03_7178701_155 | BrA03 | 7,178,701 | AT2G30690 | AT2G30690 | I |
| BnA03 | bnA1715   | 185.6 | BrA03_7225004_272 | BrA03 | 7,225,004 | AT2G30880 | AT2G30880 | I |
| BnA03 | bnA1713   | 186.1 | BrA03_7284240_301 | BrA03 | 7,284,240 | AT2G31100 | AT2G31100 | J |
| BnA03 | bnA1712   | 187.5 | BrA03_7521574_301 | BrA03 | 7,521,574 | AT1G05520 |           |   |
| BnA03 | bnA1711   | 187.5 | BrA03_7618218_224 | BrA03 | 7,618,218 | AT5G28463 |           |   |
| BnA03 | bnA1709   | 187.8 | BrA03_7766266_309 | BrA03 | 7,766,266 | AT2G12640 |           |   |
| BnA03 | BGR80     | 190   | BrA03_7377352_124 | BrA03 | 7,377,352 | AT2G31510 | AT2G31510 | J |
| BnA03 | bnA5064   | 191.4 | BrA03_7793224_299 | BrA03 | 7,793,224 | AT2G32850 | AT2G32850 | J |
| BnA03 | bnA1706   | 191.4 | BrA03_7935716_301 | BrA03 | 7,935,716 | AT2G33830 | AT2G33830 | J |
| BnA03 | Na12-E02A | 191.9 | BrA03_7953653_103 | BrA03 | 7,953,653 | AT1G17310 |           |   |
| BnA03 | bnA1700   | 193.5 | BrA03_8396675_308 | BrA03 | 8,396,675 | AT2G36010 | AT2G36010 | J |
| BnA03 | bnA5195   | 193.5 | BrA03_8585046_301 | BrA03 | 8,585,046 | AT2G27200 |           |   |
| BnA03 | bnA0092   | 193.5 | BrA03_8627204_301 | BrA03 | 8,627,204 | AT2G36910 | AT2G36910 | J |
| BnA03 | bnA0098   | 193.5 | BrA03_8629844_303 | BrA03 | 8,629,844 | AT2G36910 | AT2G36910 | J |
| BnA03 | bnA1842   | 193.8 | BrA03_8940224_301 | BrA03 | 8,940,224 | AT2G38020 | AT2G38020 | J |
| BnA03 | BGR75     | 195.1 | BrA03_8963189_141 | BrA03 | 8,963,189 | AT2G38090 | AT2G38090 | J |
| BnA03 | bnA5284   | 199.9 | BrA03_9243550_307 | BrA03 | 9,243,550 | AT2G38840 | AT2G38840 | J |
| BnA03 | bnA1846   | 199.9 | BrA03_9250681_288 | BrA03 | 9,250,681 | AT3G54620 |           |   |
| BnA03 | bnA1847   | 199.9 | BrA03_9258827_301 | BrA03 | 9,258,827 | AT2G38910 | AT2G38910 | J |

|       |         |       |                             |       |            |           |           |   |
|-------|---------|-------|-----------------------------|-------|------------|-----------|-----------|---|
| BnA03 | bnA1849 | 199.9 | BoC03_10808656_301          |       |            | AT2G39260 | AT2G39260 | J |
| BnA03 | bnA5880 | 199.9 | BrA03_9382131_301           | BrA03 | 9,382,131  | AT3G49700 |           |   |
| BnA03 | bnA1851 | 200.5 | BrA03_9627215_301           | BrA03 | 9,627,215  | AT2G40004 | AT2G40004 | J |
| BnA03 | bnA5590 | 200.5 | BrA03_9641522_301           | BrA03 | 9,641,522  | AT5G13485 |           |   |
| BnA03 | bnA1852 | 200.5 | BrA03_9657714_299           | BrA03 | 9,657,714  | AT2G40080 | AT2G40080 | J |
| BnA03 | bnA5577 | 201.6 | BrA03_10455016_301          | BrA03 | 10,455,016 | AT2G43500 | AT2G43500 | J |
| BnA03 | bnA1686 | 202.9 | BrA03_10969259_301          | BrA03 | 10,969,259 | AT5G45820 |           |   |
| BnA03 | bnA1692 | 203.2 | BrA03_10716163_301          | BrA03 | 10,716,163 | AT2G44640 | AT2G44640 | J |
| BnA03 | bnA1691 | 203.2 | BrA03_10761610_301          | BrA03 | 10,761,610 | AT2G44940 | AT2G44940 | J |
| BnA03 | bnA0057 | 203.2 | BrA03_10900451_301          | BrA03 | 10,900,451 | AT2G45660 | AT2G45660 | J |
| BnA03 | bnA5575 | 204.7 | BrA03_11319872_301          | BrA03 | 11,319,872 | AT1G21860 |           |   |
| BnA03 | bnA1681 | 204.7 | BrA03_11365646_301          | BrA03 | 11,365,646 | AT5G54320 |           |   |
| BnA03 | bnA1678 | 204.7 | BrA03_11499674_302          | BrA03 | 11,499,674 | AT5G28640 |           |   |
| BnA03 | bnA1676 | 204.7 | BrA03_11593119_301          | BrA03 | 11,593,119 | AT2G27050 | AT2G27050 | I |
| BnA03 | bnA0238 | 204.7 | BoC03_14372308_301          |       |            | AT4G00040 |           |   |
| BnA03 | bnA1677 | 204.7 | BrA03_11531312_301          | BrA03 | 11,531,312 | AT2G27330 | AT2G27330 | I |
| BnA03 | bnA4986 | 204.7 | BrA03_11534180_301          | BrA03 | 11,534,180 | AT2G27310 | AT2G27310 | I |
| BnA03 | bnA1682 | 204.7 | BrScaffold000167_105752_301 |       |            | AT2G29320 | AT2G29320 | I |
| BnA03 | bnA1685 | 205   | BrA03_11070726_301          | BrA03 | 11,070,726 | AT5G54100 |           |   |
| BnA03 | bnA1683 | 205   | BrA03_11218618_301          | BrA03 | 11,218,618 | AT2G47760 | AT2G47760 | J |
| BnA03 | bnA1674 | 205   | BrA03_11685935_300          | BrA03 | 11,685,935 | AT2G40100 | AT2G40100 | J |
| BnA03 | bnA1673 | 205.6 | BrA03_12316922_301          | BrA03 | 12,316,922 | AT5G19900 |           |   |
| BnA03 | bnA1232 | 205.6 | BrA03_12548931_305          | BrA03 | 12,548,931 | AT4G10180 | AT4G10180 | P |
| BnA03 | bnA1670 | 206   | BrA03_12932549_301          | BrA03 | 12,932,549 | AT4G12120 | AT4G12120 | P |
| BnA03 | bnA1669 | 206.1 | BrA03_12933240_294          | BrA03 | 12,933,240 | AT1G42745 |           |   |
| BnA03 | bnA1667 | 206.2 | BrA03_13160678_301          | BrA03 | 13,160,678 | AT4G04470 | AT4G04470 | O |

|       |           |       |                              |       |            |           |           |   |
|-------|-----------|-------|------------------------------|-------|------------|-----------|-----------|---|
| BnA03 | bnA1665   | 206.3 | BrA03_13257273_260           | BrA03 | 13,257,273 | AT5G35240 |           |   |
| BnA03 | bnA4985   | 206.4 | BrA03_12990760_301           | BrA03 | 12,990,760 | AT2G33940 |           |   |
| BnA03 | bnA1663   | 206.5 | BrA03_13365862_301           | BrA03 | 13,365,862 | AT4G03430 | AT4G03430 | O |
| BnA03 | bnA1662   | 206.6 | BrA03_13425088_301           | BrA03 | 13,425,088 | AT4G03260 | AT4G03260 | O |
| BnA03 | bnA1660   | 206.6 | BrA03_13579698_250           | BrA03 | 13,579,698 | AT4G02725 | AT4G02725 | O |
| BnA03 | bnA2170   | 206.9 | BrA05_3828439_301            |       |            | AT5G21160 |           |   |
| BnA03 | bnA4844   | 207.2 | BrA03_13298884_301           | BrA03 | 13,298,884 | AT1G61660 |           |   |
| BnA03 | BEN133    | 209.4 | BrA03_11054113_157           |       |            | AT4G00230 |           |   |
| BnA03 | BRAS051B  | 209.9 |                              |       |            |           |           |   |
| BnA03 | BRAS087B  | 211.3 |                              |       |            | AT5G16220 |           |   |
| BnA03 | bnA5446   | 215.5 | BrA03_13678885_301           | BrA03 | 13,678,885 | AT4G02410 | AT4G02410 | O |
| BnA03 | bnA5903   | 215.5 | BrA07_6044789_301            |       |            | AT4G16810 |           |   |
| BnA03 | bnA1659   | 216.3 | BrA03_13658610_263           | BrA03 | 13,658,610 | AT4G02480 | AT4G02480 | O |
| BnA03 | bnA1658   | 216.6 | BrA03_13707058_303           | BrA03 | 13,707,058 | AT4G02920 |           |   |
| BnA03 | bnA1656   | 216.6 | BoC03_18995783_301           |       |            | AT4G01950 | AT4G01950 | O |
| BnA03 | bnA1650   | 218.1 | BrA03_14292099_301           | BrA03 | 14,292,099 | AT3G01750 | AT3G01750 | F |
| BnA03 | BEN25     | 221.9 | BrA03_14628164_132           | BrA03 | 14,628,164 | AT3G03550 | AT3G03550 | F |
| BnA03 | bnA1643   | 224.3 | BoScaffold000040_1433582_301 |       |            | AT3G05610 | AT3G05610 | F |
| BnA03 | bnA1638   | 225.4 | BrA03_15368607_301           | BrA03 | 15,368,607 | AT4G24670 |           |   |
| BnA03 | bnA1637   | 225.4 | BrA03_15421652_301           | BrA03 | 15,421,652 | AT3G06940 | AT3G06940 | F |
| BnA03 | BoGMS1425 | 226.3 |                              |       |            |           |           |   |
| BnA03 | BrGMS216  | 227.7 | BrA03_16125257_283           | BrA03 | 16,125,257 | AT2G24700 |           |   |
| BnA03 | BrGMS217  | 228.8 | BrA03_16137511_129           | BrA03 | 16,137,511 | AT5G02580 |           |   |
| BnA03 | bnA1631   | 230.4 | BrA03_16229444_301           | BrA03 | 16,229,444 | AT3G11510 | AT3G11510 | F |
| BnA03 | BGR35     | 233.2 | BrA03_16137523_113           | BrA03 | 16,137,523 | AT5G02580 |           |   |
| BnA04 | bnA1167   | 0     | BrA03_15882_301              |       |            | AT5G41755 |           |   |

|       |           |      |                             |       |           |           |           |   |
|-------|-----------|------|-----------------------------|-------|-----------|-----------|-----------|---|
| BnA04 | bna0702   | 0    | BrA01_22363559_293          |       |           | AT5G11840 | AT5G11840 | R |
| BnA04 | bna0817   | 0.6  | BoC04_27594573_294          |       |           | AT1G21350 |           |   |
| BnA04 | bna0556   | 3.6  | BoC08_35189595_301          |       |           | AT5G06810 | AT5G06810 | R |
| BnA04 | sN13034   | 4.2  | BrA04_6624964_137           |       |           | AT5G27100 |           |   |
| BnA04 | bna3986   | 5.2  | BoScaffold000192_253750_301 |       |           | AT5G65830 |           |   |
| BnA04 | BRAS021   | 5.9  |                             |       |           |           |           |   |
| BnA04 | Na10-C01A | 8.6  |                             |       |           |           |           |   |
| BnA04 | BoGMS829  | 8.6  |                             |       |           |           |           |   |
| BnA04 | bna2052   | 9.2  | BoC04_29405992_301          |       |           | AT3G28400 |           |   |
| BnA04 | bna0697   | 9.2  | BoC04_29321703_301          |       |           | ATMG00510 |           |   |
| BnA04 | BnEMS1184 | 32.8 | BrA04_276812_389            | BrA04 | 276,812   | AT3G62840 | AT3G62840 | N |
| BnA04 | bna1810   | 34.1 | BrA04_600073_301            | BrA04 | 600,073   | AT3G09400 |           |   |
| BnA04 | bna1819   | 36   | BrA04_1213046_301           | BrA04 | 1,213,046 | AT3G59820 | AT3G59820 | N |
| BnA04 | bna1822   | 37.1 | BrA04_1457537_301           | BrA04 | 1,457,537 | AT3G28870 |           |   |
| BnA04 | bna1827   | 38.7 | BrA04_1735132_301           | BrA04 | 1,735,132 | AT3G57690 | AT3G57690 | N |
| BnA04 | bna1828   | 38.7 | BrA04_1779999_301           | BrA04 | 1,779,999 | AT3G57610 | AT3G57610 | N |
| BnA04 | bna5083   | 38.7 | BrA04_1894868_214           | BrA04 | 1,894,868 | AT3G25225 |           |   |
| BnA04 | bna1830   | 38.7 | BrA04_1943599_301           | BrA04 | 1,943,599 | AT5G33070 |           |   |
| BnA04 | bna1832   | 39.1 | BrA04_2048437_301           | BrA04 | 2,048,437 | AT3G53590 |           |   |
| BnA04 | bna5913   | 39.5 | BrA04_2199893_301           | BrA04 | 2,199,893 | AT3G22100 |           |   |
| BnA04 | bna4845   | 39.5 | BrA04_2230696_301           | BrA04 | 2,230,696 | AT3G56550 | AT3G56550 | N |
| BnA04 | bna1834   | 39.5 | BrA04_2309487_289           | BrA04 | 2,309,487 | AT3G56360 | AT3G56360 | N |
| BnA04 | bna5592   | 40.3 | BrA04_2497900_301           | BrA04 | 2,497,900 | AT3G55850 | AT3G55850 | N |
| BnA04 | bna1860   | 40.6 | BrA04_2650277_301           | BrA04 | 2,650,277 | AT3G55610 | AT3G55610 | N |
| BnA04 | bna1861   | 41.4 | BrA04_2688974_301           | BrA04 | 2,688,974 | AT3G56620 |           |   |
| BnA04 | bna5196   | 41.4 | BrA04_2933073_218           | BrA04 | 2,933,073 | AT3G47810 |           |   |

|       |           |      |                             |       |           |           |           |   |
|-------|-----------|------|-----------------------------|-------|-----------|-----------|-----------|---|
| BnA04 | bna1865   | 41.4 | BrA04_2968931_301           | BrA04 | 2,968,931 | AT3G29078 |           |   |
| BnA04 | bna5593   | 42.2 | BrA04_2735498_301           | BrA04 | 2,735,498 | AT3G55440 | AT3G55440 | N |
| BnA04 | sR9411    | 45   |                             |       |           |           |           |   |
| BnA04 | BGR98     | 48.4 |                             |       |           | AT3G52770 | AT3G52770 | N |
| BnA04 | CB10347   | 48.7 | BrA04_4267194_184           | BrA04 | 4,267,194 |           |           |   |
| BnA04 | BnEMS1116 | 51.5 | BrA04_5237214_137           | BrA04 | 5,237,214 | AT5G41380 |           |   |
| BnA04 | bna5342   | 55.2 | BoC04_7704927_262           |       |           | AT5G35540 |           |   |
| BnA04 | bna5868   | 55.3 | BrA04_4112310_301           | BrA04 | 4,112,310 | AT5G53390 |           |   |
| BnA04 | bna5595   | 55.4 | BrA04_4259512_185           | BrA04 | 4,259,512 | AT3G52220 | AT3G52220 | N |
| BnA04 | bna1876   | 55.4 | BrA04_4263813_301           | BrA04 | 4,263,813 | AT3G52200 | AT3G52200 | N |
| BnA04 | bna1885   | 55.4 | BrA04_4823706_301           | BrA04 | 4,823,706 | AT4G14070 |           |   |
| BnA04 | bna1884   | 55.4 | BrA04_4932863_301           | BrA04 | 4,932,863 | AT2G19800 |           |   |
| BnA04 | bna1882   | 55.4 | BrA04_5287304_301           | BrA04 | 5,287,304 | AT4G23260 |           |   |
| BnA04 | bna5881   | 55.4 | BrA06_5428029_222           |       |           | AT4G04880 |           |   |
| BnA04 | bna1888   | 56.5 | BrA04_5985363_301           | BrA04 | 5,985,363 | AT2G05260 |           |   |
| BnA04 | bna1893   | 58.2 | BrA04_7035364_301           | BrA04 | 7,035,364 | AT4G26900 |           |   |
| BnA04 | bna1901   | 58.5 | BrA04_7588670_301           | BrA04 | 7,588,670 | AT5G40240 |           |   |
| BnA04 | bna1895   | 59.1 | BrA04_7233828_301           | BrA04 | 7,233,828 | AT3G29010 |           |   |
| BnA04 | bna1900   | 59.1 | BrA04_7520180_301           | BrA04 | 7,520,180 | AT4G13980 |           |   |
| BnA04 | bna1894   | 59.1 | BrA08_19316263_301          |       |           | AT5G66260 |           |   |
| BnA04 | bna3976   | 59.9 | BoScaffold000192_615990_301 |       |           | AT2G22155 |           |   |
| BnA04 | bna5380   | 60.2 | BrA04_7643434_301           | BrA04 | 7,643,434 | AT3G13772 |           |   |
| BnA04 | BEN98     | 61.8 | BrA04_7920797_150           | BrA04 | 7,920,797 | AT5G40660 |           |   |
| BnA04 | pMR181A   | 69.5 |                             |       |           | AT1G47765 |           |   |
| BnA05 | BnGMS584B | 0    |                             |       |           | AT2G05780 |           |   |
| BnA05 | BGR74     | 2.5  |                             |       |           | AT2G05990 |           |   |

|       |          |      |                    |       |            |           |           |   |
|-------|----------|------|--------------------|-------|------------|-----------|-----------|---|
| BnA05 | BrGMS406 | 3.3  |                    |       |            | AT3G24760 | AT3G24760 | F |
| BnA05 | Ra3-D04  | 3.3  |                    |       |            |           |           |   |
| BnA05 | Na10-A09 | 3.3  |                    |       |            |           |           |   |
| BnA05 | bnA1616  | 4.1  | BrA03_18834614_301 | BrA03 | 18,834,614 | AT3G21760 | AT3G21760 | F |
| BnA05 | bnA1615  | 4.1  | BrA03_18836652_294 | BrA03 | 18,836,652 | AT3G21760 | AT3G21760 | F |
| BnA05 | bnA1617  | 4.1  | BoC06_34818725_300 |       |            | AT5G54650 |           |   |
| BnA05 | bnA1613  | 4.4  | BoC03_25470736_300 |       |            | AT1G47320 |           |   |
| BnA05 | bnA1608  | 4.7  | BrA03_20080950_301 | BrA03 | 20,080,950 | AT2G07690 |           |   |
| BnA05 | bnA1601  | 5.3  | BrA03_20667595_269 | BrA03 | 20,667,595 | AT2G16440 |           |   |
| BnA05 | bnA5566  | 10.4 | BrA03_21198346_301 | BrA03 | 21,198,346 | AT5G61010 |           |   |
| BnA05 | bnA4349  | 11.2 | BoC06_37133106_225 |       |            | AT5G06710 |           |   |
| BnA05 | bnA1599  | 12.3 | BrA03_21504721_301 | BrA03 | 21,504,721 | AT3G49790 |           |   |
| BnA05 | bnA1590  | 16   | BrA03_22300522_303 | BrA03 | 22,300,522 | AT4G15530 |           |   |
| BnA05 | CB10034  | 19.4 |                    |       |            | AT5G27840 |           |   |
| BnA05 | bnA2843  | 24   | BrA03_23127508_301 | BrA03 | 23,127,508 | AT4G18010 | AT4G18010 | U |
| BnA05 | bnA1589  | 24.3 | BrA03_23467471_300 | BrA03 | 23,467,471 |           |           |   |
| BnA05 | bnA4642  | 24.3 | BrA03_23503230_234 | BrA03 | 23,503,230 | AT3G03940 |           |   |
| BnA05 | bnA2842  | 24.4 | BrA03_23061650_301 | BrA03 | 23,061,650 | AT5G38710 |           |   |
| BnA05 | bnA5911  | 24.5 | BoC06_41088998_252 |       |            | AT4G18550 | AT4G18550 | U |
| BnA05 | bnA5886  | 24.5 | BrA03_23160521_301 | BrA03 | 23,160,521 | AT5G24870 |           |   |
| BnA05 | bnA0038  | 24.5 | BrA03_23526906_301 | BrA03 | 23,526,906 | AT4G18960 | AT4G18960 | U |
| BnA05 | bnA0037  | 24.5 | BrA03_23528679_301 | BrA03 | 23,528,679 | AT4G18960 | AT4G18960 | U |
| BnA05 | bnA1585  | 24.5 | BrA03_23800118_301 | BrA03 | 23,800,118 | AT5G05770 |           |   |
| BnA05 | bnA4840  | 25.9 | BrA03_23887523_299 | BrA03 | 23,887,523 | AT1G08650 |           |   |
| BnA05 | bnA1584  | 26.9 | BrA03_24365533_301 | BrA03 | 24,365,533 | AT5G13200 |           |   |
| BnA05 | pMR181B  | 27.7 |                    |       |            |           |           |   |

|       |          |      |                    |       |            |           |           |   |
|-------|----------|------|--------------------|-------|------------|-----------|-----------|---|
| BnA05 | bnA1575  | 28.8 | BrA03_25047900_301 | BrA03 | 25,047,900 | AT4G23370 | AT4G23370 | U |
| BnA05 | bnA1572  | 29.7 | BrA03_25340743_301 | BrA03 | 25,340,743 | AT5G23750 |           |   |
| BnA05 | bnA5121  | 29.7 | BrA03_25340743_301 | BrA03 | 25,340,743 | AT5G23750 |           |   |
| BnA05 | bnA5097  | 29.7 | BrA03_25499459_223 | BrA03 | 25,499,459 | AT5G56550 |           |   |
| BnA05 | bnA4838  | 29.7 | BrA03_25504906_301 | BrA03 | 25,504,906 | AT4G19925 |           |   |
| BnA05 | BGR56    | 30.6 |                    |       |            | AT4G23740 | AT4G23740 | U |
| BnA05 | BEN83    | 30.6 |                    |       |            | AT4G24240 | AT4G24240 | U |
| BnA05 | BnEMS146 | 30.6 |                    |       |            | AT4G24240 | AT4G24240 | U |
| BnA05 | bnA1571  | 31.7 | BrA03_25614556_301 | BrA03 | 25,614,556 | AT5G28468 |           |   |
| BnA05 | bnA4389  | 32.2 | BoC06_43594658_301 |       |            | AT4G24680 | AT4G24680 | U |
| BnA05 | bnA1567  | 32.2 | BoC06_43730699_301 |       |            | AT4G25120 | AT4G25120 | U |
| BnA05 | bnA0021  | 33.1 | BrA03_26163719_301 | BrA03 | 26,163,719 | AT4G26010 | AT4G26010 | U |
| BnA05 | bnA5444  | 34   | BrA03_26272710_301 | BrA03 | 26,272,710 | AT4G26300 | AT4G26300 | U |
| BnA05 | BnGMS265 | 50   | BrA05_22210227_345 | BrA05 | 22,210,227 | AT1G70850 |           |   |
| BnA05 | sR9477   | 51.2 | BrA05_22498503_263 | BrA05 | 22,498,503 | AT4G20000 |           |   |
| BnA05 | bnA2038  | 52.3 | BrA05_22292108_301 | BrA05 | 22,292,108 | AT3G09660 | AT3G09660 | F |
| BnA05 | bnA5616  | 53   | BrA05_22427562_301 | BrA05 | 22,427,562 | AT3G09100 | AT3G09100 | F |
| BnA05 | bnA2037  | 53   | BrA05_22427562_301 | BrA05 | 22,427,562 | AT3G09100 | AT3G09100 | F |
| BnA05 | bnA2035  | 54.4 | BrA05_22580798_289 | BrA05 | 22,580,798 | AT5G23430 |           |   |
| BnA05 | bnA5092  | 54.4 | BrA05_22631736_297 | BrA05 | 22,631,736 | AT3G08030 | AT3G08030 | F |
| BnA05 | BGR38    | 55.2 | BrA05_22561185_146 | BrA05 | 22,561,185 | AT3G32305 |           |   |
| BnA05 | bnA2030  | 57.9 | BoC05_32350587_297 | BoC05 | 32,350,587 | AT3G07130 | AT3G07130 | F |
| BnA05 | bnA5450  | 57.9 | BoC05_32350689_300 | BoC05 | 32,350,689 | AT3G07130 | AT3G07130 | F |
| BnA05 | bnA2029  | 59   | BoC05_32515770_301 | BoC05 | 32,515,770 | AT3G06930 | AT3G06930 | F |
| BnA05 | bnA5091  | 59.5 | BoC05_32701848_301 | BoC05 | 32,701,848 | AT3G06483 |           |   |
| BnA05 | bnA2033  | 60.6 | BrA05_22766863_301 | BrA05 | 22,766,863 | AT5G30545 |           |   |



|       |           |      |                             |       |            |           |           |   |
|-------|-----------|------|-----------------------------|-------|------------|-----------|-----------|---|
| BnA05 | bnA2028   | 61.1 | BrA05_23020982_301          | BrA05 | 23,020,982 | AT3G06860 | AT3G06860 | F |
| BnA05 | bnA5288   | 61.6 | BrA05_23082022_302          | BrA05 | 23,082,022 | AT3G66658 | AT3G66658 | F |
| BnA05 | bnA2026   | 61.9 | BrA05_23162355_301          | BrA05 | 23,162,355 | AT3G06490 | AT3G06490 | F |
| BnA05 | bnA1476   | 62.2 | BrA02_23247623_301          |       |            | AT3G06330 | AT3G06330 | F |
| BnA05 | bnA5090   | 63.3 | BrA05_23207558_245          | BrA05 | 23,207,558 | AT3G23620 |           |   |
| BnA05 | BRMS-007  | 65.5 | BrA05_23268922_132          | BrA05 | 23,268,922 | AT4G29100 |           |   |
| BnA05 | bnA5615   | 67.1 | BrA05_23385467_301          | BrA05 | 23,385,467 | AT3G05240 | AT3G05240 | F |
| BnA05 | bnA2024   | 67.4 | BrA05_23425922_301          | BrA05 | 23,425,922 | AT3G05165 | AT3G05165 | F |
| BnA05 | bnA2025   | 68.1 | BrA05_23502843_301          | BrA05 | 23,502,843 | AT3G04980 | AT3G04980 | F |
| BnA05 | bnA0306   | 68.8 | BrScaffold000203_24232_301  |       |            | AT3G04730 | AT3G04730 | F |
| BnA05 | bnA0286   | 68.8 | BrScaffold000191_59457_298  |       |            | AT3G04450 | AT3G04450 | F |
| BnA05 | BoGMS1059 | 70.6 |                             |       |            |           |           |   |
| BnA05 | bnA1515   | 72.2 | BrA02_26946155_301          |       |            | AT3G04050 | AT3G04050 | F |
| BnA05 | bnA5991   | 72.2 | BoScaffold000460_96754_301  |       |            | AT4G33400 |           |   |
| BnA05 | bnA1516   | 74.6 | BoScaffold000460_119035_272 |       |            | AT3G03860 | AT3G03860 | F |
| BnA05 | bnA5371   | 76.9 | BoScaffold000461_93279_301  |       |            | AT3G03770 | AT3G03770 | F |
| BnA05 | bnA0321   | 78.8 | BrA02_26686182_208          |       |            | AT5G47150 |           |   |
| BnA05 | bnA1511   | 80.7 | BrA02_26644147_301          |       |            | AT3G03090 | AT3G03090 | F |
| BnA05 | bnA2023   | 82.7 | BrA05_23533846_301          | BrA05 | 23,533,846 | AT3G14760 |           |   |
| BnA05 | BEN200A   | 83.5 | BrA05_23831506_214          | BrA05 | 23,831,506 | AT5G15080 |           |   |
| BnA06 | bnA5650   | 0    | BrA06_2993650_301           | BrA06 | 2,993,650  | AT1G08650 | AT1G08650 | A |
| BnA06 | bnA5651   | 0.3  | BrA06_3114668_301           | BrA06 | 3,114,668  | AT4G05095 |           |   |
| BnA06 | bnA4853   | 0.6  | BrA06_3203762_301           | BrA06 | 3,203,762  | ATMG00160 |           |   |
| BnA06 | bnA0130   | 0.6  | BrA06_3279046_301           | BrA06 | 3,279,046  | AT1G09570 | AT1G09570 | A |
| BnA06 | bnA2267   | 0.6  | BrA06_3279046_301           | BrA06 | 3,279,046  | AT1G09570 | AT1G09570 | A |
| BnA06 | bnA5251   | 3.6  | BrA06_3651623_301           | BrA06 | 3,651,623  | AT5G18670 |           |   |

|       |           |      |                             |       |            |           |           |   |
|-------|-----------|------|-----------------------------|-------|------------|-----------|-----------|---|
| BnA06 | bnA2259   | 3.6  | BrA06_3651623_301           | BrA06 | 3,651,623  | AT5G18670 |           |   |
| BnA06 | sN2837    | 4.2  | BrA06_3578834_153           | BrA06 | 3,578,834  | AT5G64710 |           |   |
| BnA06 | Na12-D08  | 5    | BrA06_3726880_69            | BrA06 | 3,726,880  | AT1G10600 | AT1G10600 | A |
| BnA06 | bnA2257   | 5.9  | BrA06_3759170_301           | BrA06 | 3,759,170  | AT1G10650 | AT1G10650 | A |
| BnA06 | bnA5653   | 5.9  | BrA06_3759170_301           | BrA06 | 3,759,170  | AT1G10650 | AT1G10650 | A |
| BnA06 | bnA2256   | 5.9  | BrA06_3818571_301           | BrA06 | 3,818,571  | AT1G10840 | AT1G10840 | A |
| BnA06 | bnA5040   | 6.3  | BrA06_3867444_242           | BrA06 | 3,867,444  | AT1G11040 | AT1G11040 | A |
| BnA06 | bnA2254   | 6.3  | BrA06_3867444_242           | BrA06 | 3,867,444  | AT1G11040 | AT1G11040 | A |
| BnA06 | bnA2251   | 8    | BrA06_4035954_301           | BrA06 | 4,035,954  | AT2G05710 |           |   |
| BnA06 | bnA5392   | 8    | BrA06_4026624_322           | BrA06 | 4,026,624  | AT5G46325 |           |   |
| BnA06 | bnA4852   | 9.4  | BrA06_4428809_222           | BrA06 | 4,428,809  | AT1G12730 | AT1G12730 | A |
| BnA06 | OI10-D01  | 11.3 | BrA06_4399748_208           | BrA06 | 4,399,748  | AT2G31250 |           |   |
| BnA06 | bnA2245   | 14   | BoScaffold000127_203799_227 |       |            | AT1G14040 | AT1G14040 | A |
| BnA06 | bnA5455   | 14.1 | BoScaffold000127_203799_227 |       |            | AT1G14040 | AT1G14040 | A |
| BnA06 | bnA4062   | 14.2 | BoC05_3725941_301           |       |            | AT1G12200 |           |   |
| BnA06 | bnA2247   | 14.3 | BrA06_4534080_301           | BrA06 | 4,534,080  | AT4G05430 |           |   |
| BnA06 | bnA2246   | 14.3 | BrA06_4738919_263           | BrA06 | 4,738,919  | AT1G11990 |           |   |
| BnA06 | bnA5657   | 14.6 | BrA06_5577784_301           | BrA06 | 5,577,784  | AT1G14540 | AT1G14540 | A |
| BnA06 | bnA2279   | 16.2 | BrA06_6520150_300           | BrA06 | 6,520,150  | AT1G16970 | AT1G16970 | A |
| BnA06 | bnA5343   | 17.1 | BrA06_6691478_301           | BrA06 | 6,691,478  | AT1G17440 | AT1G17440 | A |
| BnA06 | bnA5658   | 17.4 | BrA06_6878642_301           | BrA06 | 6,878,642  | AT1G17930 | AT1G17930 | A |
| BnA06 | bnA5932   | 20.4 | BrA09_16121849_288          |       |            | AT3G56710 | AT3G56710 | N |
| BnA06 | bnA5887   | 20.7 | BrA09_16121849_288          |       |            | AT3G56710 | AT3G56710 | N |
| BnA06 | BoGMS1230 | 30.1 |                             |       |            |           |           |   |
| BnA06 | BoGMS1203 | 34.7 |                             |       |            |           |           |   |
| BnA06 | BGR34     | 36.3 | BrA06_11864505_137          | BrA06 | 11,864,505 | AT5G03940 |           |   |

|       |           |      |                             |       |            |           |           |   |
|-------|-----------|------|-----------------------------|-------|------------|-----------|-----------|---|
| BnA06 | BRMS-049A | 36.6 | BrA06_12580768_141          | BrA06 | 12,580,768 | AT5G28640 |           |   |
| BnA06 | BEN253    | 36.9 | BrA06_9151367_207           |       |            | AT3G49640 | AT3G49640 | M |
| BnA06 | bnA5132   | 37.9 | BrA06_10134979_311          |       |            | AT3G48010 | AT3G48010 | M |
| BnA06 | bnA3796   | 37.9 | BoC03_39601720_301          |       |            | AT3G47610 | AT3G47610 | M |
| BnA06 | bnA0279   | 38.2 | BrScaffold000796_970_278    |       |            | AT3G44160 | AT3G44160 | M |
| BnA06 | bnA1897   | 39.2 | BrScaffold000178_232155_303 |       |            | AT5G12920 |           |   |
| BnA06 | bnA3792   | 39.9 | BoC03_39765391_301          |       |            | AT3G31950 | AT3G31950 | M |
| BnA06 | bnA4342   | 40.5 | BrA06_11667624_301          | BrA06 | 11,667,624 | AT2G29880 |           |   |
| BnA06 | bnA5781   | 40.9 | BrScaffold000244_26717_302  |       |            | AT2G15410 |           |   |
| BnA06 | bnA5142   | 42   | BrA06_19593663_299          |       |            | AT5G62880 | AT5G62880 | X |
| BnA06 | bnA0335   | 42   | BrA06_19609664_301          |       |            | AT5G62900 | AT5G62900 | X |
| BnA06 | bnA2318   | 43   | BrA06_14265955_298          | BrA06 | 14,265,955 | AT5G63420 | AT5G63420 | X |
| BnA06 | bnA4958   | 43.6 | BrA06_14594986_291          | BrA06 | 14,594,986 | AT5G64030 | AT5G64030 | X |
| BnA06 | bnA2296   | 48.1 | BrA06_16620834_301          | BrA06 | 16,620,834 | AT5G23610 | AT5G23610 | Q |
| BnA06 | bnA2297   | 49.2 | BrA06_16659915_301          | BrA06 | 16,659,915 | AT5G23740 | AT5G23740 | Q |
| BnA06 | bnA2580   | 50.3 | BrA07_1396686_301           |       |            | AT5G26680 |           |   |
| BnA06 | bnA4990   | 51.7 | BoC06_35346921_292          |       |            | AT5G25960 | AT5G25960 | Q |
| BnA06 | bnA2305   | 51.7 | BrA06_17822965_301          | BrA06 | 17,822,965 | AT5G25960 | AT5G25960 | Q |
| BnA06 | bnA2307   | 51.7 | BrA06_18116757_177          | BrA06 | 18,116,757 | AT5G26920 | AT5G26920 | Q |
| BnA06 | bnA5898   | 52.2 | BrA06_18657413_302          | BrA06 | 18,657,413 | AT4G01950 |           |   |
| BnA06 | bnA5877   | 52.2 | BrA06_18657413_302          | BrA06 | 18,657,413 | AT4G01950 |           |   |
| BnA06 | BGR45     | 53.2 | BrA06_17992203_105          | BrA06 | 17,992,203 | AT5G11580 |           |   |
| BnA06 | BoGMS314  | 53.5 | BrA06_18069372_115          | BrA06 | 18,069,372 | AT4G08900 |           |   |
| BnA06 | bnA2311   | 57.2 | BoScaffold000153_664915_261 |       |            | AT5G27970 | AT5G27970 | Q |
| BnA06 | bnA5395   | 60.3 | BoScaffold000153_664915_261 |       |            | AT5G27970 | AT5G27970 | Q |
| BnA06 | bnA2312   | 60.6 | BrA06_18772227_301          | BrA06 | 18,772,227 | AT5G49430 |           |   |

|       |          |      |                            |       |            |           |           |   |
|-------|----------|------|----------------------------|-------|------------|-----------|-----------|---|
| BnA06 | bnA5665  | 60.9 | BrA06_21475708_303         | BrA06 | 21,475,708 | AT5G49120 | AT5G49120 | V |
| BnA06 | bnA2336  | 60.9 | BrA06_21512860_268         | BrA06 | 21,512,860 | AT4G22680 |           | V |
| BnA06 | bnA4655  | 61.2 | BrA06_21247253_219         | BrA06 | 21,247,253 | AT5G48520 | AT5G48520 | V |
| BnA06 | bnA2339  | 61.5 | BrA06_21171937_301         | BrA06 | 21,171,937 | AT5G48270 | AT5G48270 | V |
| BnA06 | BnEMS59  | 64.2 | BrA06_21942889_171         | BrA06 | 21,942,889 | AT3G28920 | AT3G28920 | Q |
| BnA06 | BnEMS60  | 64.5 | BrA06_21942889_171         | BrA06 | 21,942,889 | AT3G28920 | AT3G28920 | Q |
| BnA06 | bnA5922  | 66.5 | BrA06_21676878_301         | BrA06 | 21,676,878 | AT3G30340 | AT3G30340 | L |
| BnA06 | bnA2342  | 69.7 | BrA06_22104886_300         | BrA06 | 22,104,886 | AT3G28470 | AT3G28470 | L |
| BnA06 | bnA5298  | 76.1 | BrA06_22807945_301         | BrA06 | 22,807,945 | AT3G26370 | AT3G26370 | L |
| BnA06 | bnA2344  | 76.1 | BrA06_22807945_301         | BrA06 | 22,807,945 | AT3G26370 | AT3G26370 | L |
| BnA06 | bnA2346  | 76.1 | BrA06_22896930_301         | BrA06 | 22,896,930 | AT3G26130 | AT3G26130 | L |
| BnA06 | sR12156A | 77.7 | BrA06_23032511_177         | BrA06 | 23,032,511 | AT5G16580 |           | L |
| BnA06 | bnA5923  | 79.1 | BrA06_23656979_285         | BrA06 | 23,656,979 | AT2G26650 |           | L |
| BnA06 | bnA0629  | 80.5 | BoC06_27820808_301         |       |            | AT5G46100 | AT5G46100 | V |
| BnA06 | bnA2358  | 80.5 | BrA06_24695710_301         | BrA06 | 24,695,710 | AT3G48770 |           | V |
| BnA06 | BEN278B  | 81.6 |                            |       |            | AT5G47210 | AT5G47210 | V |
| BnA06 | BnEMS695 | 85.1 | BrA06_26241942_212         | BrA06 | 26,241,942 | AT4G38250 | AT4G38250 | U |
| BnA06 | CB10330  | 86.1 | BrA06_26104700_148         | BrA06 | 26,104,700 | AT4G38950 | AT4G38950 | U |
| BnA06 | bnA2364  | 87.4 | BrA06_26039984_299         | BrA06 | 26,039,984 | AT4G39210 | AT4G39210 | U |
| BnA06 | bnA5347  | 87.4 | BrA06_26039984_299         | BrA06 | 26,039,984 | AT4G39210 | AT4G39210 | U |
| BnA07 | bnA0826  | 0    | BoScaffold000462_60360_302 |       |            | AT3G06370 | AT3G06370 | F |
| BnA07 | bnA0882  | 2.9  | BoScaffold000460_57388_301 |       |            | AT3G03970 | AT3G03970 | F |
| BnA07 | bnA0084  | 2.9  | BoC05_32774889_301         |       |            | AT3G03450 | AT3G03450 | F |
| BnA07 | bnA4140  | 2.9  | BoScaffold000461_38186_301 |       |            | AT2G42590 |           | F |
| BnA07 | bnA0837  | 3.4  | BoC05_32800593_301         |       |            | AT3G13140 |           | F |
| BnA07 | BEN186   | 3.9  |                            |       |            |           |           | F |

|       |          |      |                                |       |            |           |           |   |
|-------|----------|------|--------------------------------|-------|------------|-----------|-----------|---|
| BnA07 | bnA0860  | 5.2  | BoScaffold000485_60469_265     |       |            | AT3G02832 | AT3G02832 | F |
| BnA07 | bnA1214  | 5.2  | BrA04_9976097_301              |       |            | AT5G42645 |           |   |
| BnA07 | BEN200B  | 6.3  |                                |       |            |           |           |   |
| BnA07 | bnA0866  | 30.5 | BoC07_40244944_301             |       |            | AT2G47800 |           |   |
| BnA07 | bnA3850  | 31.6 | BoC07_26012560_223             | BoC07 | 26,012,560 |           |           |   |
| BnA07 | bnA1038  | 32.4 | BoScaffold000009_P1_226299_301 |       |            |           |           |   |
| BnA07 | bnA3842  | 33.2 | BoC07_25410267_301             | BoC07 | 25,410,267 | AT4G04313 |           |   |
| BnA07 | bnA3846  | 33.3 | BoC07_25858003_301             | BoC07 | 25,858,003 | AT1G49190 | AT1G49190 | C |
| BnA07 | bnA3848  | 33.4 | BoC07_25928145_301             | BoC07 | 25,928,145 | AT1G49040 | AT1G49040 | C |
| BnA07 | bnA3851  | 33.5 | BoC07_26057612_301             | BoC07 | 26,057,612 | AT3G26483 |           |   |
| BnA07 | bnA0888  | 33.6 | BoC07_26256585_301             | BoC07 | 26,256,585 | AT1G48930 | AT1G48930 | C |
| BnA07 | bnA4502  | 33.6 | BoC07_25424488_301             | BoC07 | 25,424,488 | AT1G30560 |           |   |
| BnA07 | bnA5067  | 33.6 | BoC07_25424488_301             | BoC07 | 25,424,488 | AT1G30560 |           |   |
| BnA07 | bnA3841  | 35.9 | BoC07_13552421_301             |       |            | AT1G40089 |           |   |
| BnA07 | bnA0504  | 37   | BoC07_25038543_302             | BoC07 | 25,038,543 | AT3G42700 |           |   |
| BnA07 | bnA0771  | 37.6 | BoC07_13343898_301             |       |            | AT5G57350 |           |   |
| BnA07 | bnA0505  | 39.2 | BoC07_24768318_301             | BoC07 | 24,768,318 | AT4G36925 |           |   |
| BnA07 | BGO161   | 40.8 |                                |       |            | AT5G67060 |           |   |
| BnA07 | BEN391A  | 40.8 |                                |       |            |           |           |   |
| BnA07 | BGO160B  | 41.1 |                                |       |            | AT1G52640 | AT1G52640 | C |
| BnA07 | bnA0951  | 43   | BoC07_21887638_301             | BoC07 | 21,887,638 |           |           |   |
| BnA07 | bnA4370  | 43.8 | BoC06_41160354_281             |       |            |           |           |   |
| BnA07 | BoGMS490 | 44.6 |                                |       |            | AT3G06060 |           |   |
| BnA07 | bnA0423  | 46.8 | BoC07_20728474_301             | BoC07 | 20,728,474 | AT2G47170 |           |   |
| BnA07 | bnA4786  | 47.1 | BrA05_11057670_301             |       |            | AT1G49100 | AT1G49100 | C |
| BnA07 | bnA0517  | 49.3 | BoScaffold000284_16130_301     |       |            | AT5G28340 | AT5G28340 | Q |

|       |           |      |                              |       |            |           |           |   |
|-------|-----------|------|------------------------------|-------|------------|-----------|-----------|---|
| BnA07 | bnA0547   | 50.1 | BoC07_18776685_301           | BoC07 | 18,776,685 | AT5G28491 | AT5G28491 | Q |
| BnA07 | OI10-D03B | 50.6 |                              |       |            | AT3G18000 |           |   |
| BnA07 | bnA4086   | 52.8 | BoC03_33143147_301           |       |            | AT4G00124 |           |   |
| BnA07 | bnA0036   | 52.8 | BoScaffold000284_63570_300   |       |            | AT5G35840 | AT5G35840 | S |
| BnA07 | bnA0035   | 52.8 | BoScaffold000284_63051_301   |       |            | AT5G35840 | AT5G35840 | S |
| BnA07 | bnA4817   | 55.3 | BoScaffold000029_1654518_301 |       |            | AT1G63680 |           |   |
| BnA07 | bnA3876   | 55.3 | BoScaffold000029_1736580_301 |       |            | AT3G02010 |           |   |
| BnA07 | bnA0351   | 55.3 | BrA01_21633874_301           |       |            | AT2G10250 |           |   |
| BnA07 | bnA3877   | 55.3 | BoScaffold000029_1577084_301 |       |            | AT5G40700 | AT5G40700 | S |
| BnA07 | bnA3878   | 55.3 | BoScaffold000029_1537639_301 |       |            | AT5G07070 | AT5G07070 | R |
| BnA07 | bnA3875   | 55.3 | BoC06_13001402_300           |       |            | AT5G05720 | AT5G05720 | R |
| BnA07 | bnA3149   | 57.4 | BoC04_33944565_303           |       |            | AT4G04316 |           |   |
| BnA07 | bnA0594   | 57.7 | BoC07_15896409_301           | BoC07 | 15,896,409 | AT3G43715 |           |   |
| BnA07 | bnA0806   | 58   | BoScaffold000401_176117_301  |       |            | AT1G33813 |           |   |
| BnA07 | bnA0896   | 58.3 | BoScaffold000401_119918_239  |       |            | AT5G49580 |           |   |
| BnA07 | BoGMS545  | 79.3 | BrA07_277845_210             | BrA07 | 277,845    | AT2G20280 | AT2G20280 | H |
| BnA07 | J0609     | 79.6 |                              |       |            |           |           |   |
| BnA07 | BGO114    | 79.6 |                              |       |            |           |           |   |
| BnA07 | bnA5254   | 80.1 | BrA07_287125_301             | BrA07 | 287,125    | AT2G14200 | AT2G14200 | H |
| BnA07 | bnA0323   | 80.1 | BrA07_359031_301             | BrA07 | 359,031    | AT3G19340 |           |   |
| BnA07 | bnA2369   | 80.1 | BrA07_367720_301             | BrA07 | 367,720    | AT3G42438 |           |   |
| BnA07 | sR4047    | 83.8 | BrA07_829294_270             | BrA07 | 829,294    | AT4G29510 |           |   |
| BnA07 | bnA2411   | 85.7 | BrA07_923958_207             | BrA07 | 923,958    | AT2G18070 | AT2G18070 | H |
| BnA07 | bnA2410   | 86.5 | BrA07_1197924_299            | BrA07 | 1,197,924  | AT5G62370 |           |   |
| BnA07 | bnA5003   | 87.8 | BrA07_1300601_296            | BrA07 | 1,300,601  | AT2G18800 | AT2G18800 | H |
| BnA07 | bnA3045   | 87.8 | BrA09_18277850_301           |       |            | AT1G56020 |           |   |

|       |           |      |                                 |       |           |           |           |   |
|-------|-----------|------|---------------------------------|-------|-----------|-----------|-----------|---|
| BnA07 | bnA3044   | 87.8 | BrA07_1372394_300               | BrA07 | 1,372,394 | AT5G09920 |           |   |
| BnA07 | bnA3128   | 88.1 | BrA07_1766618_273               | BrA07 | 1,766,618 | AT5G25750 |           |   |
| BnA07 | bnA3040   | 88.3 | BrA10_11548392_301              |       |           | AT2G17790 | AT2G17790 | H |
| BnA07 | bnA5056   | 88.5 | BrA10_11839859_301              |       |           | AT5G17350 |           |   |
| BnA07 | bnA3036   | 88.7 | BrA10_11872043_301              |       |           | AT2G17410 | AT2G17410 | H |
| BnA07 | bnA3043   | 88.9 | BrA07_1603000_301               | BrA07 | 1,603,000 | AT5G48550 |           |   |
| BnA07 | bnA5888   | 88.9 | BrA07_1734481_301               | BrA07 | 1,734,481 | AT1G07650 |           |   |
| BnA07 | bnA5002   | 88.9 | BrA07_1595561_301               | BrA07 | 1,595,561 | AT2G19010 | AT2G19010 | H |
| BnA07 | bnA5264   | 88.9 | BrA07_1766618_273               | BrA07 | 1,766,618 | AT5G25750 |           |   |
| BnA07 | BoGMS1575 | 89.4 |                                 |       |           |           |           |   |
| BnA07 | sR0282R   | 89.7 |                                 |       |           |           |           |   |
| BnA07 | Na12-B02  | 91.1 |                                 |       |           |           |           |   |
| BnA07 | bnA5777   | 92.7 | BrA10_3160721_301               |       |           | AT2G15630 | AT2G15630 | H |
| BnA07 | bnA2377   | 93.1 | BrA07_3065564_282               | BrA07 | 3,065,564 | AT2G04340 |           |   |
| BnA07 | bnA3037   | 94.7 | BrA10_11839859_301              |       |           | AT5G17350 | AT5G17350 | R |
| BnA07 | bnA5661   | 96   | BrA10_3116354_268               |       |           | ATCG00670 |           |   |
| BnA07 | bnA3029   | 96   | BrA09_19718503_279              |       |           | AT5G02030 | AT5G02030 | R |
| BnA07 | bnA3120   | 96   | BrA10_3243515_298               |       |           | AT1G31870 |           |   |
| BnA07 | bnA5669   | 96   | BoScaffold000001_P2_2064625_267 |       |           | AT5G26582 |           |   |
| BnA07 | bnA2378   | 96   | BrA08_9537088_276               |       |           | AT4G30210 |           |   |
| BnA07 | bnA2383   | 96.3 | BrA07_3717065_301               | BrA07 | 3,717,065 | AT5G06380 | AT5G06380 | R |
| BnA07 | bnA2386   | 96.3 | BrA07_3935049_301               | BrA07 | 3,935,049 | AT3G24530 | AT3G24530 | F |
| BnA07 | bnA2382   | 96.3 | BrA07_3596136_301               | BrA07 | 3,596,136 | AT5G06690 |           |   |
| BnA07 | bnA2391   | 97.2 | BrA07_4180352_301               | BrA07 | 4,180,352 | AT5G41120 |           |   |
| BnA07 | bnA2384   | 97.2 | BrA07_3796323_302               | BrA07 | 3,796,323 | AT3G24630 |           |   |
| BnA07 | bnA2394   | 98.3 | BrA07_4480120_291               | BrA07 | 4,480,120 | AT3G24230 | AT3G24230 | F |

|       |         |       |                    |       |            |           |           |
|-------|---------|-------|--------------------|-------|------------|-----------|-----------|
| BnA07 | Ra2-G08 | 98.8  | BrA07_4761169_394  | BrA07 | 4,761,169  | AT2G32910 |           |
| BnA07 | BEN236  | 98.8  | BrA07_4675434_199  | BrA07 | 4,675,434  | AT4G21595 |           |
| BnA07 | bnA2396 | 99.3  | BrA07_4911941_301  | BrA07 | 4,911,941  | AT2G16280 |           |
| BnA07 | bnA2400 | 99.3  | BrA07_5089975_263  | BrA07 | 5,089,975  | AT3G23300 | AT3G23300 |
| BnA07 | bnA2390 | 100.1 | BoC06_3357873_302  |       |            | AT5G50080 | AT5G50080 |
| BnA07 | bnA2404 | 100.9 | BrA07_5367229_301  | BrA07 | 5,367,229  | AT5G54390 | AT5G54390 |
| BnA07 | bnA4856 | 100.9 | BrA01_10550339_299 |       |            | AT5G09850 |           |
| BnA07 | BrGMS38 | 101.8 | BrA07_5615635_407  | BrA07 | 5,615,635  | AT2G03700 |           |
| BnA07 | bnA2416 | 103.3 | BrA07_6248377_104  | BrA07 | 6,248,377  | AT3G52810 |           |
| BnA07 | BEN45   | 103.6 | BrA07_6280732_122  | BrA07 | 6,280,732  | AT1G29350 | AT1G29350 |
| BnA07 | bnA2418 | 104.5 | BrA07_6360973_301  | BrA07 | 6,360,973  | AT3G20140 |           |
| BnA07 | bnA1324 | 106   | BrA07_7009807_279  | BrA07 | 7,009,807  | AT1G27340 | AT1G27340 |
| BnA07 | bnA2432 | 107.1 | BrA07_7562178_301  | BrA07 | 7,562,178  | AT2G11870 |           |
| BnA07 | BGR20   | 107.8 | BrA07_7572279_104  | BrA07 | 7,572,279  | AT3G33112 |           |
| BnA07 | bnA2433 | 109.1 | BrA07_7610939_301  | BrA07 | 7,610,939  | AT1G27090 | AT1G27090 |
| BnA07 | bnA2434 | 109.1 | BrA07_7635002_285  | BrA07 | 7,635,002  | AT3G23130 |           |
| BnA07 | bnA4857 | 109.1 | BrA07_7713158_301  | BrA07 | 7,713,158  | AT2G39700 |           |
| BnA07 | bnA2435 | 109.6 | BrA07_7752491_226  | BrA07 | 7,752,491  | AT1G27110 | AT1G27110 |
| BnA07 | bnA2436 | 109.6 | BrA07_7874003_301  | BrA07 | 7,874,003  | AT1G27120 | AT1G27120 |
| BnA07 | bnA1477 | 109.9 | BoC09_38401229_303 |       |            | AT5G24210 | AT5G24210 |
| BnA07 | bnA2452 | 110.8 | BrA07_9030502_297  | BrA07 | 9,030,502  | AT4G10480 |           |
| BnA07 | bnA0287 | 112.1 | BrA01_12936313_302 |       |            | AT2G31020 |           |
| BnA07 | CB10299 | 113.7 | BrA07_9168262_154  | BrA07 | 9,168,262  | AT1G20470 |           |
| BnA07 | bnA0132 | 115   | BrA07_9841219_301  | BrA07 | 9,841,219  | AT5G25752 | AT5G25752 |
| BnA07 | bnA5173 | 115   | BrA07_10076851_301 | BrA07 | 10,076,851 | AT5G26310 | AT5G26310 |
| BnA07 | bnA2465 | 115   | BrA07_10070123_301 | BrA07 | 10,070,123 | AT1G29730 |           |

F

W

W

B

B

B

B

B

Q

Q

Q



|       |           |       |                    |       |            |           |           |   |
|-------|-----------|-------|--------------------|-------|------------|-----------|-----------|---|
| BnA07 | bnA2464   | 115   | BrA07_10009675_301 | BrA07 | 10,009,675 | AT5G66770 | AT5G66770 | X |
| BnA07 | bnA2462   | 115   | BrA07_9867651_305  | BrA07 | 9,867,651  | AT5G67050 | AT5G67050 | X |
| BnA07 | bnA2467   | 117.2 | BoC06_647138_302   |       |            | AT5G51200 |           |   |
| BnA07 | BEN178    | 118   |                    |       |            |           |           |   |
| BnA07 | BEN288    | 118.8 | BrA07_11178806_135 | BrA07 | 11,178,806 | AT2G28650 | AT2G28650 | I |
| BnA07 | bnA1305   | 119.9 | BrA02_14309_301    | BrA02 | 14,309     | AT2G29040 | AT2G29040 | I |
| BnA07 | bnA1307   | 119.9 | BrA02_76135_272    | BrA02 | 76,135     | AT2G36724 | AT2G36724 | J |
| BnA07 | bnA5521   | 122.4 | BrA02_236832_302   | BrA02 | 236,832    | AT5G39000 |           |   |
| BnA07 | bnA1312   | 122.7 | BrA02_303906_301   | BrA02 | 303,906    | AT2G39110 | AT2G39110 | J |
| BnA07 | bnA5368   | 122.7 | BrA02_303906_301   | BrA02 | 303,906    | AT2G39110 | AT2G39110 | J |
| BnA07 | bnA5597   | 124.4 | BrA04_9074350_301  |       |            | AT5G40890 | AT5G40890 | S |
| BnA07 | bnA1315   | 125.1 | BrA02_423955_211   | BrA02 | 423,955    | AT5G40340 | AT5G40340 | S |
| BnA07 | bnA5524   | 125.1 | BrA02_613245_301   | BrA02 | 613,245    | AT5G41040 | AT5G41040 | S |
| BnA07 | BEN254    | 126.2 |                    |       |            |           |           |   |
| BnA07 | bnA5525   | 127   | BrA02_770869_301   | BrA02 | 770,869    | AT5G41790 | AT5G41790 | S |
| BnA07 | bnA1320   | 127   | BrA02_647559_280   | BrA02 | 647,559    | AT5G41220 | AT5G41220 | S |
| BnA07 | bnA2617   | 127   | BrA02_6306888_301  |       |            | AT5G22790 |           |   |
| BnA07 | bnA1322   | 127   | BrA02_810600_301   | BrA02 | 810,600    | AT5G41890 | AT5G41890 | S |
| BnA07 | bnA5188   | 127.5 | BrA07_11472403_301 | BrA07 | 11,472,403 | AT3G53235 | AT3G53235 | N |
| BnA07 | bnA2471   | 128.6 | BrA07_11728297_301 | BrA07 | 11,728,297 | AT3G54440 | AT3G54440 | N |
| BnA07 | bnA2475   | 128.9 | BrA07_11960515_301 | BrA07 | 11,960,515 | AT5G56950 |           |   |
| BnA07 | bnA2474   | 128.9 | BrA07_11898064_287 | BrA07 | 11,898,064 | AT4G16590 |           |   |
| BnA07 | bnA2473   | 129.5 | BrA07_11896650_302 | BrA07 | 11,896,650 | AT3G55120 | AT3G55120 | N |
| BnA07 | bnA2476   | 130.2 | BrA07_12027872_306 | BrA07 | 12,027,872 | AT3G56100 | AT3G56100 | N |
| BnA07 | sR7223    | 131.3 | BrA07_12314707_413 | BrA07 | 12,314,707 | AT3G57160 | AT3G57160 | N |
| BnA07 | OI09-A06B | 132.1 |                    |       |            |           |           |   |

|       |           |       |                    |       |            |           |           |   |
|-------|-----------|-------|--------------------|-------|------------|-----------|-----------|---|
| BnA07 | bnA4662   | 134.3 | BrA07_12361556_300 | BrA07 | 12,361,556 | AT3G57400 | AT3G57400 | N |
| BnA07 | bnA5682   | 134.7 | BrA07_12511408_301 | BrA07 | 12,511,408 | AT3G20550 |           | N |
| BnA07 | bnA2483   | 134.7 | BrA07_12411966_301 | BrA07 | 12,411,966 | AT3G57610 | AT3G57610 | N |
| BnA07 | CB10439   | 135.1 | BrA07_12579775_179 | BrA07 | 12,579,775 | AT3G58100 | AT3G58100 | N |
| BnA07 | sNRA59    | 137.8 | BrA07_13058693_125 | BrA07 | 13,058,693 |           |           | N |
| BnA07 | bnA2489   | 139.4 | BrA07_13156451_301 | BrA07 | 13,156,451 | AT3G60830 | AT3G60830 | N |
| BnA07 | bnA2504   | 139.7 | BrA07_13654040_301 | BrA07 | 13,654,040 | AT5G24550 |           | N |
| BnA07 | bnA2503   | 139.7 | BrA07_13642281_301 | BrA07 | 13,642,281 | AT1G59870 |           | N |
| BnA07 | bnA2500   | 139.7 | BrA07_13513700_301 | BrA07 | 13,513,700 | AT1G54970 |           | N |
| BnA07 | bnA2498   | 139.7 | BrA07_13347565_301 | BrA07 | 13,347,565 | AT3G61730 | AT3G61730 | N |
| BnA07 | bnA2496   | 139.7 | BrA07_13283149_301 | BrA07 | 13,283,149 | AT3G61560 | AT3G61560 | N |
| BnA07 | bnA0085   | 139.7 | BrA07_13171897_301 | BrA07 | 13,171,897 | AT3G61070 | AT3G61070 | N |
| BnA07 | bnA2502   | 140.7 | BrA07_13568545_301 | BrA07 | 13,568,545 | AT3G62980 | AT3G62980 | N |
| BnA07 | BnGMS147A | 141.8 | BrA07_13588712_232 | BrA07 | 13,588,712 | AT3G63010 | AT3G63010 | N |
| BnA07 | bnA5926   | 142.3 | BrA07_13674921_300 | BrA07 | 13,674,921 | AT1G79840 | AT1G79840 | E |
| BnA07 | bnA5302   | 142.8 | BrA07_13840515_301 | BrA07 | 13,840,515 | ATCG00180 |           | E |
| BnA07 | bnA5045   | 142.8 | BrA07_14002506_301 | BrA07 | 14,002,506 | AT1G79610 | AT1G79610 | E |
| BnA07 | bnA2510   | 142.8 | BrA07_14002506_301 | BrA07 | 14,002,506 | AT1G79610 | AT1G79610 | E |
| BnA07 | bnA2512   | 142.8 | BrA07_14125225_301 | BrA07 | 14,125,225 | AT1G79030 | AT1G79030 | E |
| BnA07 | bnA4821   | 142.8 | BrA07_14326373_302 | BrA07 | 14,326,373 | AT1G77920 | AT1G77920 | E |
| BnA07 | bnA0167   | 142.8 | BrA07_14594194_301 | BrA07 | 14,594,194 | AT1G76878 | AT1G76878 | E |
| BnA07 | bnA4778   | 142.8 | BrA07_14596135_301 | BrA07 | 14,596,135 | AT1G76878 | AT1G76878 | E |
| BnA07 | bnA0168   | 142.8 | BrA07_14599861_301 | BrA07 | 14,599,861 | AT1G76870 | AT1G76870 | E |
| BnA07 | bnA2521   | 142.8 | BrA07_14792117_299 | BrA07 | 14,792,117 | AT1G79750 | AT1G79750 | E |
| BnA07 | bnA2524   | 142.8 | BrA07_14926716_301 | BrA07 | 14,926,716 | AT1G75330 | AT1G75330 | E |
| BnA07 | bnA2514   | 144.1 | BrA07_14388103_301 | BrA07 | 14,388,103 | AT3G56760 |           | E |

|       |           |       |                             |       |            |           |           |   |
|-------|-----------|-------|-----------------------------|-------|------------|-----------|-----------|---|
| BnA07 | BGR100    | 145.2 | BrA07_14656668_112          | BrA07 | 14,656,668 | AT1G76590 |           |   |
| BnA07 | BGR99A    | 145.2 | BrA07_14701381_148          | BrA07 | 14,701,381 | AT3G26290 |           |   |
| BnA07 | BGO156B   | 145.2 | BrA07_15030696_149          | BrA07 | 15,030,696 | AT5G61495 |           |   |
| BnA07 | bnA5112   | 145.7 | BoScaffold000343_161218_301 |       |            | AT3G12020 |           |   |
| BnA07 | bnA2526   | 145.7 | BrA07_15006833_301          | BrA07 | 15,006,833 | AT1G74970 | AT1G74970 | E |
| BnA07 | bnA2527   | 145.7 | BrA07_15035219_301          | BrA07 | 15,035,219 | AT1G74910 | AT1G74910 | E |
| BnA07 | bnA0169   | 145.7 | BrA07_15353942_297          | BrA07 | 15,353,942 | AT1G73290 | AT1G73290 | E |
| BnA07 | bnA5688   | 145.7 | BrA07_15354338_301          | BrA07 | 15,354,338 | AT1G73290 | AT1G73290 | E |
| BnA07 | bnA0086   | 145.7 | BrA07_13936337_300          | BrA07 | 13,936,337 | AT2G13410 |           |   |
| BnA07 | bnA0088   | 147.2 | BrA07_15381136_300          | BrA07 | 15,381,136 | AT1G73177 | AT1G73177 | E |
| BnA07 | bnA0067   | 149.3 | BrA07_16025144_275          | BrA07 | 16,025,144 | AT3G22190 |           |   |
| BnA07 | bnA2540   | 149.3 | BrA07_16164923_302          | BrA07 | 16,164,923 | AT1G69580 | AT1G69580 | E |
| BnA07 | bnA2541   | 149.3 | BrA07_16254256_301          | BrA07 | 16,254,256 | AT3G55540 |           |   |
| BnA07 | Ol12-E03A | 150.7 | BrA07_16247167_117          | BrA07 | 16,247,167 |           |           |   |
| BnA07 | FITO035B  | 152.1 |                             |       |            |           |           |   |
| BnA07 | bnA2547   | 153   | BrA07_16967417_301          | BrA07 | 16,967,417 | AT1G65640 | AT1G65640 | E |
| BnA07 | bnA2549   | 153   | BrA07_17047113_301          | BrA07 | 17,047,113 | AT1G65960 | AT1G65960 | E |
| BnA07 | bnA2551   | 153   | BrA07_17212352_301          | BrA07 | 17,212,352 | AT2G29820 |           |   |
| BnA07 | bnA2555   | 153.9 | BrA07_17418674_296          | BrA07 | 17,418,674 | AT1G67140 | AT1G67140 | E |
| BnA07 | bnA5047   | 154.6 | BrA07_17839683_301          | BrA07 | 17,839,683 | AT3G25620 |           |   |
| BnA07 | bnA0018   | 155.3 | BrA07_18115597_301          | BrA07 | 18,115,597 | AT5G24550 |           |   |
| BnA07 | bnA2562   | 155.6 | BrA07_18088001_301          | BrA07 | 18,088,001 | AT5G59990 |           |   |
| BnA07 | bnA2559   | 155.6 | BrA07_17846151_301          | BrA07 | 17,846,151 | AT1G68360 | AT1G68360 | E |
| BnA07 | bnA4955   | 155.9 | BrA07_18261993_301          | BrA07 | 18,261,993 | AT1G69220 | AT1G69220 | E |
| BnA07 | bnA0047   | 155.9 | BrA07_18127466_299          | BrA07 | 18,127,466 | AT1G68862 | AT1G68862 | E |
| BnA08 | bnA0381   | 0     | BrA08_2513043_305           |       |            | AT2G11730 | AT2G11730 | H |

|       |           |      |                             |       |           |           |           |   |
|-------|-----------|------|-----------------------------|-------|-----------|-----------|-----------|---|
| BnA08 | bnA2760   | 2.5  | BrA08_914135_259            |       |           | AT2G17530 | AT2G17530 | H |
| BnA08 | BGR2      | 2.8  | BrA08_1088421_148           |       |           | AT5G55780 |           |   |
| BnA08 | bnA5304   | 3.1  | BrA08_759127_301            | BrA08 | 759,127   | AT1G54000 | AT1G54000 | C |
| BnA08 | bnA2762   | 3.1  | BrA08_814384_301            | BrA08 | 814,384   | AT1G53710 | AT1G53710 | C |
| BnA08 | bnA2743   | 5.8  | BrA08_2516101_301           | BrA08 | 2,516,101 | AT1G49710 | AT1G49710 | C |
| BnA08 | bnA0378   | 6.2  | BrA08_2500830_301           | BrA08 | 2,500,830 | AT1G47290 | AT1G47290 | C |
| BnA08 | bnA0374   | 6.9  | BrA05_15205515_301          |       |           | AT1G36840 | AT1G36840 | C |
| BnA08 | bnA5876   | 8.8  | BrA08_2973687_301           | BrA08 | 2,973,687 | AT4G04290 | AT4G04290 | O |
| BnA08 | bnA5897   | 9.9  | BrA08_2973687_301           | BrA08 | 2,973,687 | AT4G04290 | AT4G04290 | O |
| BnA08 | BoGMS1375 | 12.4 |                             |       |           |           |           |   |
| BnA08 | bnA5259   | 13.5 | BrA08_3336709_303           | BrA08 | 3,336,709 | AT1G17410 |           |   |
| BnA08 | BGR93     | 17.8 | BrA08_5736292_113           | BrA08 | 5,736,292 | AT1G46192 |           |   |
| BnA08 | bnA0221   | 22.1 | BrA08_7092588_301           | BrA08 | 7,092,588 | AT5G21222 | AT5G21222 | R |
| BnA08 | BGR69     | 23.2 | BrA08_6151459_136           | BrA08 | 6,151,459 | AT5G19300 | AT5G19300 | R |
| BnA08 | BGR1A     | 23.2 | BrA08_8946388_150           | BrA08 | 8,946,388 | AT5G35660 |           |   |
| BnA08 | bnA5706   | 24.6 | BrA08_979684_89             |       |           | AT5G14390 | AT5G14390 | R |
| BnA08 | sS2331BB  | 26   | BrA08_8588167_116           | BrA08 | 8,588,167 | AT5G06810 | AT5G06810 | R |
| BnA08 | bnA2756   | 27.8 | BrA08_7182928_304           | BrA08 | 7,182,928 | AT3G53970 |           |   |
| BnA08 | bnA2753   | 27.8 | BrA08_7410142_301           | BrA08 | 7,410,142 | AT5G05840 | AT5G05840 | R |
| BnA08 | bnA2759   | 27.8 | BoScaffold000064_262868_307 |       |           | AT2G15120 | AT2G15120 | H |
| BnA08 | bnA5411   | 27.8 | BoScaffold000064_262868_307 |       |           | AT2G15120 | AT2G15120 | H |
| BnA08 | bnA4864   | 28.3 | BrA08_5366755_298           | BrA08 | 5,366,755 | AT2G14080 | AT2G14080 | H |
| BnA08 | bnA2710   | 28.7 | BrA08_5664464_294           | BrA08 | 5,664,464 | AT1G71820 |           |   |
| BnA08 | bnA2925   | 28.8 | BrA08_4781235_301           | BrA08 | 4,781,235 | AT5G28892 | AT5G28892 | Q |
| BnA08 | bnA2713   | 29   | BrA08_5300196_301           | BrA08 | 5,300,196 | AT5G28916 | AT5G28916 | Q |
| BnA08 | bnA5052   | 29   | BrA08_5490202_302           | BrA08 | 5,490,202 | AT2G39130 |           |   |

|       |         |      |                             |       |            |           |           |   |
|-------|---------|------|-----------------------------|-------|------------|-----------|-----------|---|
| BnA08 | bnA5705 | 29   | BrA08_5660516_305           | BrA08 | 5,660,516  | AT4G31080 |           |   |
| BnA08 | bnA0319 | 30.2 | BrA08_7064446_301           | BrA08 | 7,064,446  | AT1G63710 |           |   |
| BnA08 | bnA2752 | 30.2 | BrA08_7444486_309           | BrA08 | 7,444,486  | AT1G34000 | AT1G34000 | B |
| BnA08 | bnA2704 | 30.2 | BrA08_7717106_301           | BrA08 | 7,717,106  | AT5G50160 |           |   |
| BnA08 | BGR61   | 31.3 | BrA08_7614956_149           | BrA08 | 7,614,956  | AT1G33110 | AT1G33110 | B |
| BnA08 | bnA0291 | 31.9 | BoC08_9845211_301           |       |            | AT1G32700 | AT1G32700 | B |
| BnA08 | bnA1296 | 32.1 | BrA08_7698295_301           | BrA08 | 7,698,295  | AT1G32361 | AT1G32361 | B |
| BnA08 | bnA0217 | 32.3 | BrA08_7232063_301           | BrA08 | 7,232,063  | AT3G32917 | AT3G32917 | M |
| BnA08 | bnA2495 | 32.5 | BoC04_17492930_266          |       |            | AT3G43955 | AT3G43955 | M |
| BnA08 | bnA1525 | 33.1 | BrScaffold000180_112061_233 |       |            | AT4G05616 |           |   |
| BnA08 | bnA2596 | 35.4 | BrA08_8479782_301           | BrA08 | 8,479,782  | AT5G33300 | AT5G33300 | S |
| BnA08 | bnA5303 | 35.6 | BrA08_8495863_301           | BrA08 | 8,495,863  | AT5G61670 |           |   |
| BnA08 | bnA2599 | 35.6 | BrA08_8721374_301           | BrA08 | 8,721,374  | AT5G44010 |           |   |
| BnA08 | bnA2598 | 35.6 | BrA08_8589463_301           | BrA08 | 8,589,463  | AT5G26749 |           |   |
| BnA08 | bnA2707 | 35.9 | BoC01_19271492_301          |       |            | AT5G01849 |           |   |
| BnA08 | bnA1941 | 35.9 | BrA08_8200184_317           | BrA08 | 8,200,184  | AT5G35700 | AT5G35700 | S |
| BnA08 | BEN43   | 42.5 | BrA08_10397240_227          | BrA08 | 10,397,240 | AT4G17950 |           |   |
| BnA08 | BEN48   | 45   | BrA08_10398587_201          | BrA08 | 10,398,587 | AT2G18300 |           |   |
| BnA08 | FITO131 | 45.5 |                             |       |            |           |           |   |
| BnA08 | bnA5221 | 46.9 | BrA08_10186467_301          | BrA08 | 10,186,467 | AT5G55640 | AT5G55640 | W |
| BnA08 | bnA2694 | 46.9 | BrA08_10186467_301          | BrA08 | 10,186,467 | AT5G55640 | AT5G55640 | W |
| BnA08 | bnA2699 | 48.4 | BrA08_10711075_301          | BrA08 | 10,711,075 |           |           |   |
| BnA08 | BGR8    | 49.6 | BrA08_11358558_145          | BrA08 | 11,358,558 |           |           |   |
| BnA08 | bnA2686 | 51.4 | BoScaffold000375_162328_301 |       |            | AT4G25010 | AT4G25010 | U |
| BnA08 | bnA2687 | 51.4 | BrA08_14729798_301          | BrA08 | 14,729,798 | AT4G25010 | AT4G25010 | U |
| BnA08 | BRMS97  | 53.5 | BrA08_14676090_194          | BrA08 | 14,676,090 | AT4G25410 | AT4G25410 | U |

|       |         |      |                    |       |            |           |           |   |
|-------|---------|------|--------------------|-------|------------|-----------|-----------|---|
| BnA08 | sR3688  | 57.2 | BrA08_16205351_255 | BrA08 | 16,205,351 | AT4G38550 | AT4G38550 | U |
| BnA08 | BEN116  | 57.7 | BrA08_16117222_181 | BrA08 | 16,117,222 | AT4G38900 | AT4G38900 | U |
| BnA08 | bna2672 | 58.5 | BrA08_16033023_308 | BrA08 | 16,033,023 | AT4G39200 | AT4G39200 | U |
| BnA08 | bna2677 | 59.4 | BrA08_15726752_301 | BrA08 | 15,726,752 | AT2G22480 | AT2G22480 | I |
| BnA08 | bna5699 | 59.4 | BrA08_15726752_301 | BrA08 | 15,726,752 | AT2G22480 | AT2G22480 | I |
| BnA08 | bna4993 | 61   | BrA08_16248783_301 | BrA08 | 16,248,783 | AT5G53200 |           |   |
| BnA08 | bna2668 | 61.3 | BrA08_16318859_301 | BrA08 | 16,318,859 | AT1G30460 | AT1G30460 | B |
| BnA08 | bna4861 | 64.8 | BrA08_16652551_302 | BrA08 | 16,652,551 | AT1G40099 |           |   |
| BnA08 | BGO006  | 67.6 | BrA08_16900709_113 | BrA08 | 16,900,709 | AT1G28400 | AT1G28400 | B |
| BnA08 | BGO120B | 68.1 | BrA08_17125566_219 | BrA08 | 17,125,566 | AT5G37680 |           |   |
| BnA08 | CALSSRA | 68.9 | BrA08_17620710_145 | BrA08 | 17,620,710 | AT1G26310 | AT1G26310 | B |
| BnA08 | bna2652 | 69.9 | BrA08_17642831_301 | BrA08 | 17,642,831 | AT1G26410 | AT1G26410 | B |
| BnA08 | bna2653 | 69.9 | BrA08_17586824_299 | BrA08 | 17,586,824 | AT1G26190 | AT1G26190 | B |
| BnA08 | bna2650 | 70   | BrA08_17858014_209 | BrA08 | 17,858,014 | AT5G20470 |           |   |
| BnA08 | bna5404 | 70.1 | BrA08_17858014_209 | BrA08 | 17,858,014 | AT5G20470 |           |   |
| BnA08 | bna2654 | 70.2 | BrA08_17579140_301 | BrA08 | 17,579,140 | AT1G26120 | AT1G26120 | B |
| BnA08 | bna2655 | 70.3 | BrA08_17535008_301 | BrA08 | 17,535,008 | AT1G25560 | AT1G25560 | B |
| BnA08 | bna5462 | 70.3 | BrA08_17473735_301 | BrA08 | 17,473,735 | AT1G25360 | AT1G25360 | B |
| BnA08 | bna2649 | 70.3 |                    |       |            | AT1G50810 |           |   |
| BnA08 | bna2660 | 71.1 | BrA08_17192991_301 | BrA08 | 17,192,991 | AT5G26920 |           |   |
| BnA08 | bna2661 | 71.1 | BrA08_17158805_304 | BrA08 | 17,158,805 | AT4G04020 |           |   |
| BnA08 | bna2659 | 71.1 | BrA08_17297854_301 | BrA08 | 17,297,854 | AT1G24430 | AT1G24430 | B |
| BnA08 | bna5856 | 71.4 | BrA08_17050908_266 | BrA08 | 17,050,908 | AT3G25725 |           |   |
| BnA08 | bna2662 | 71.4 | BrA08_17000653_297 | BrA08 | 17,000,653 | AT5G25430 |           |   |
| BnA08 | bna2621 | 78.5 | BrA05_8223432_300  |       |            | AT1G10480 | AT1G10480 | A |
| BnA08 | bna2623 | 78.8 | BrA05_8139038_304  |       |            | AT1G10760 | AT1G10760 | A |

|       |           |      |                             |       |           |           |           |   |
|-------|-----------|------|-----------------------------|-------|-----------|-----------|-----------|---|
| BnA08 | bna5218   | 78.8 | BrA05_8139038_304           |       |           | AT1G10760 | AT1G10760 | A |
| BnA08 | bna2619   | 79.9 | BrA05_8318584_302           |       |           | AT3G15358 |           |   |
| BnA09 | BEN332A   | 0    | BrA09_936877_256            | BrA09 | 936,877   | AT4G00660 |           |   |
| BnA09 | BEN50B    | 0.8  | BrA09_936928_277            | BrA09 | 936,928   | AT1G26761 | AT1G26761 | B |
| BnA09 | BEN50A    | 10.3 | BrA09_936928_277            | BrA09 | 936,928   | AT1G26761 | AT1G26761 | B |
| BnA09 | BEN332B   | 10.6 | BrA09_936877_256            | BrA09 | 936,877   | AT4G00660 | AT4G00660 | O |
| BnA09 | BN38A     | 11.4 | BrA09_764538_156            |       |           | AT4G01060 | AT4G01060 | O |
| BnA09 | bna2964   | 20.4 | BoC09_285052_304            |       |           | AT4G01270 | AT4G01270 | O |
| BnA09 | BEN55B    | 21.3 | BrA09_2356689_162           | BrA09 | 2,356,689 | AT4G27500 |           |   |
| BnA09 | FITO135A  | 21.9 |                             |       |           |           |           |   |
| BnA09 | BrGMS725A | 30.9 | BrA09_2302831_166           | BrA09 | 2,302,831 | AT5G48230 |           |   |
| BnA09 | BnGMS133  | 43.3 | BrA09_4198837_248           | BrA09 | 4,198,837 | AT5G66640 |           |   |
| BnA09 | BnEMS820A | 49.6 |                             |       |           |           |           |   |
| BnA09 | sR9447    | 53.6 | BrA09_4281574_349           | BrA09 | 4,281,574 | AT3G01420 |           |   |
| BnA09 | sN1988    | 54   | BrA09_3907955_277           | BrA09 | 3,907,955 | AT2G13665 | AT2G13665 | H |
| BnA09 | bna2954   | 54.9 | BrScaffold000178_33738_301  |       |           | AT2G14760 | AT2G14760 | H |
| BnA09 | bna2566   | 55.1 | BrA09_4683310_301           | BrA09 | 4,683,310 | AT4G12450 |           |   |
| BnA09 | bna2953   | 55.3 | BrScaffold000178_39098_249  |       |           | AT2G14760 | AT2G14760 | H |
| BnA09 | bna5309   | 55.3 | BrA09_4905856_301           | BrA09 | 4,905,856 | AT2G18330 | AT2G18330 | H |
| BnA09 | bna2952   | 55.3 | BrA09_5298231_301           | BrA09 | 5,298,231 | AT2G18950 | AT2G18950 | H |
| BnA09 | bna2955   | 55.8 | BrA09_4357188_170           | BrA09 | 4,357,188 | AT5G67170 |           |   |
| BnA09 | bna5176   | 57.2 | BrA09_4940739_301           | BrA09 | 4,940,739 |           |           |   |
| BnA09 | bna5143   | 57.2 | BrA09_5245915_301           | BrA09 | 5,245,915 | AT5G28675 |           |   |
| BnA09 | bna0274   | 63.5 | BrA09_6783993_301           | BrA09 | 6,783,993 | AT1G64610 | AT1G64610 | D |
| BnA09 | bna2934   | 63.5 | BrA09_6805269_300           | BrA09 | 6,805,269 | AT1G64510 | AT1G64510 | D |
| BnA09 | bna0725   | 66.3 | BoScaffold000215_564770_302 |       |           | AT1G62430 | AT1G62430 | D |

|       |           |      |                    |       |            |           |           |   |
|-------|-----------|------|--------------------|-------|------------|-----------|-----------|---|
| BnA09 | BrGMS316  | 67.7 | BrA09_9108578_310  | BrA09 | 9,108,578  | AT1G59740 | AT1G59740 | D |
| BnA09 | bnA2920   | 68.8 | BrA09_9447053_301  | BrA09 | 9,447,053  | AT1G58340 | AT1G58340 | D |
| BnA09 | bnA5873   | 68.8 | BrA09_9452991_253  | BrA09 | 9,452,991  | AT5G09520 |           |   |
| BnA09 | bnA0498   | 69.5 | BoC08_1052043_301  |       |            | AT3G04820 |           |   |
| BnA09 | bnA4685   | 70.2 | BrA09_9735024_301  | BrA09 | 9,735,024  | AT4G04500 |           |   |
| BnA09 | bnA5419   | 70.7 | BrA09_9724424_301  | BrA09 | 9,724,424  | AT5G11840 |           |   |
| BnA09 | bnA2916   | 71.3 | BrA09_9845178_301  | BrA09 | 9,845,178  | AT1G56670 | AT1G56670 | D |
| BnA09 | bnA2902   | 71.6 | BrA09_13737008_301 | BrA09 | 13,737,008 | AT1G19840 |           |   |
| BnA09 | BEN284    | 73.1 | BrA09_13822937_96  | BrA09 | 13,822,937 | AT5G43460 | AT5G43460 | V |
| BnA09 | Na12-A01  | 73.4 |                    |       |            |           |           |   |
| BnA09 | BnGMS213B | 74.8 | BrA09_13917079_149 | BrA09 | 13,917,079 | AT1G67330 |           |   |
| BnA09 | BnEMS973  | 77.3 | BrA09_13642334_172 | BrA09 | 13,642,334 | AT4G38810 |           |   |
| BnA09 | bnA2905   | 79.5 | BrA09_13278233_292 | BrA09 | 13,278,233 | AT3G51850 |           |   |
| BnA09 | bnA0275   | 80.1 | BrA09_12962010_301 |       |            | AT5G45340 | AT5G45340 | V |
| BnA09 | bnA2891   | 80.1 | BrA09_16845654_301 | BrA09 | 16,845,654 | AT5G45430 | AT5G45430 | V |
| BnA09 | bnA5100   | 80.4 | BrA09_16640161_301 | BrA09 | 16,640,161 | AT5G46070 | AT5G46070 | V |
| BnA09 | bnA2895   | 80.4 | BrA09_16640161_301 | BrA09 | 16,640,161 | AT5G46070 | AT5G46070 | V |
| BnA09 | bnA2893   | 80.4 | BrA09_16722763_301 | BrA09 | 16,722,763 | AT3G03790 |           |   |
| BnA09 | bnA2894   | 80.4 | BrA09_16690925_301 | BrA09 | 16,690,925 | AT5G35495 |           |   |
| BnA09 | bnA5469   | 80.7 | BrA09_17036026_301 | BrA09 | 17,036,026 | AT4G05120 | AT4G05120 | P |
| BnA09 | bnA0245   | 81   | BrA08_9367918_302  |       |            | AT5G13160 |           |   |
| BnA09 | bnA0244   | 81   | BrA08_9420581_229  |       |            | AT4G11280 | AT4G11280 | P |
| BnA09 | bnA0248   | 81   | BrA08_9276658_302  |       |            | AT3G61570 |           |   |
| BnA09 | bnA0246   | 81   | BrA08_9326518_301  |       |            | AT4G23820 |           |   |
| BnA09 | bnA2887   | 82.4 | BrA07_5758348_284  |       |            | AT4G11790 | AT4G11790 | P |
| BnA09 | bnA2313   | 83.5 | BrA06_19739366_301 |       |            | AT5G63820 | AT5G63820 | X |



|       |           |       |                    |       |            |           |           |   |
|-------|-----------|-------|--------------------|-------|------------|-----------|-----------|---|
| BnA09 | bnA5662   | 83.5  | BrA06_19739366_301 |       |            | AT5G63820 | AT5G63820 | X |
| BnA09 | bnA0328   | 85.4  | BrA09_19111915_301 | BrA09 | 19,111,915 | AT3G43540 |           |   |
| BnA09 | bnA2882   | 85.4  | BrA09_19145713_300 | BrA09 | 19,145,713 | AT5G52240 |           |   |
| BnA09 | bnA5417   | 85.4  | BrA09_19152171_311 | BrA09 | 19,152,171 | AT5G27020 |           |   |
| BnA09 | bnA2872   | 85.4  | BrA09_20115127_301 | BrA09 | 20,115,127 | AT1G32410 | AT1G32410 | B |
| BnA09 | bnA2180   | 86    | BrA09_20620287_301 | BrA09 | 20,620,287 | AT3G60955 |           |   |
| BnA09 | BGR60     | 87.4  | BrA09_20556819_126 | BrA09 | 20,556,819 | AT1G31930 | AT1G31930 | B |
| BnA09 | CB10022A  | 87.7  |                    |       |            |           |           |   |
| BnA09 | BGR42     | 87.7  |                    |       |            |           |           |   |
| BnA09 | sR9251J   | 88.2  | BrA09_15477898_167 |       |            | AT5G20830 |           |   |
| BnA09 | BEN278A   | 88.7  |                    |       |            | AT5G47210 |           |   |
| BnA09 | BrGMS726B | 90.6  |                    |       |            |           |           |   |
| BnA09 | BGR43     | 95.4  | BrA09_23392125_137 | BrA09 | 23,392,125 | AT1G26550 | AT1G26550 | B |
| BnA09 | BGR23     | 99.5  | BrA09_24532607_124 | BrA09 | 24,532,607 |           |           |   |
| BnA09 | BnGMS131  | 100   | BrA09_24510113_135 | BrA09 | 24,510,113 | AT1G22850 |           |   |
| BnA09 | BEN59     | 100.5 | BrA09_23910646_178 | BrA09 | 23,910,646 | AT5G61440 |           |   |
| BnA09 | BN9A      | 101   |                    |       |            |           |           |   |
| BnA09 | BnEMS1144 | 102.9 | BrA09_23895488_281 | BrA09 | 23,895,488 | AT1G24120 |           |   |
| BnA09 | bnA2859   | 105.4 | BrA09_23717141_301 | BrA09 | 23,717,141 | AT1G27045 | AT1G27045 | B |
| BnA09 | bnA2861   | 105.4 | BrA09_23920888_299 | BrA09 | 23,920,888 | AT5G54420 |           |   |
| BnA09 | bnA2862   | 105.4 | BrA09_23926596_301 | BrA09 | 23,926,596 |           |           |   |
| BnA09 | bnA2865   | 105.7 | BrA09_24105625_301 | BrA09 | 24,105,625 | AT1G23480 | AT1G23480 | B |
| BnA09 | bnA5289   | 109.3 | BrA05_15805956_301 |       |            | AT5G54470 |           |   |
| BnA09 | bnA4848   | 109.6 | BrA09_24770365_301 | BrA09 | 24,770,365 | AT5G67180 |           |   |
| BnA09 | bnA2059   | 109.6 | BoC05_17195187_301 |       |            | AT1G21900 | AT1G21900 | B |
| BnA09 | bnA2603   | 110.3 | BrA09_25224371_302 | BrA09 | 25,224,371 | AT5G56930 |           |   |

|       |           |       |                    |       |            |           |           |   |
|-------|-----------|-------|--------------------|-------|------------|-----------|-----------|---|
| BnA09 | bna2852   | 110.3 | BrA09_25503885_301 | BrA09 | 25,503,885 | AT3G51120 | AT3G51120 | N |
| BnA09 | bna1598   | 111   | BrA09_25004211_301 | BrA09 | 25,004,211 | AT1G12210 |           |   |
| BnA09 | bna1596   | 111   | BrA09_25131434_304 | BrA09 | 25,131,434 | AT5G51360 |           |   |
| BnA09 | sR12777   | 112.6 | BrA09_24782574_242 | BrA09 | 24,782,574 | AT3G57190 |           |   |
| BnA09 | BGO179A   | 113.4 | BrA09_25571083_231 | BrA09 | 25,571,083 | AT3G51240 | AT3G51240 | N |
| BnA09 | BoGMS788  | 113.7 |                    |       |            |           |           |   |
| BnA09 | bna2825   | 118.6 | BrA09_28241830_308 | BrA09 | 28,241,830 | AT3G55510 | AT3G55510 | N |
| BnA09 | bna5141   | 118.6 | BrA09_28241830_308 | BrA09 | 28,241,830 | AT3G55510 | AT3G55510 | N |
| BnA09 | bna2820   | 119.7 | BrA09_28706021_301 | BrA09 | 28,706,021 | AT3G57610 | AT3G57610 | N |
| BnA09 | bna4867   | 119.7 | BrA09_28910557_301 | BrA09 | 28,910,557 | AT5G48110 |           |   |
| BnA09 | bna2815   | 120.4 | BrA09_29101489_302 | BrA09 | 29,101,489 | AT3G58780 | AT3G58780 | N |
| BnA09 | bna5468   | 120.4 | BrA09_29310612_301 | BrA09 | 29,310,612 | AT2G43410 |           |   |
| BnA09 | bna2810   | 120.4 | BrA09_29348737_293 | BrA09 | 29,348,737 | AT5G15150 |           |   |
| BnA09 | bna5306   | 122.3 | BrA09_29496278_301 | BrA09 | 29,496,278 | AT3G59950 | AT3G59950 | N |
| BnA09 | bna2809   | 122.5 | BrA09_29454769_300 | BrA09 | 29,454,769 | AT1G47920 |           |   |
| BnA09 | bna4828   | 122.5 | BrA03_22478492_271 |       |            | AT4G01530 |           |   |
| BnA09 | bna2807   | 122.5 | BrA09_29820627_301 | BrA09 | 29,820,627 | AT3G60850 | AT3G60850 | N |
| BnA09 | Na14-B03  | 124.7 |                    |       |            |           |           |   |
| BnA09 | BEN84     | 126.1 | BrA09_29791688_229 | BrA09 | 29,791,688 | AT1G80960 |           |   |
| BnA09 | FITO018   | 130.1 |                    |       |            |           |           |   |
| BnA09 | BGO179B   | 143.9 | BrA09_25571083_231 |       |            | AT3G51240 |           |   |
| BnA10 | Na12-E09  | 0     | BrA10_5190092_263  |       |            |           |           |   |
| BnA10 | Na12-D11  | 11    |                    |       |            |           |           |   |
| BnA10 | BnGMS249  | 15.9  |                    |       |            |           |           |   |
| BnA10 | BnGMS9    | 19.4  | BrA10_1812746_129  |       |            | AT5G41890 |           |   |
| BnA10 | BoGMS1114 | 19.7  |                    |       |            |           |           |   |

|       |           |      |                                |       |           |           |           |   |
|-------|-----------|------|--------------------------------|-------|-----------|-----------|-----------|---|
| BnA10 | BGR66     | 19.7 | BrA10_135760_150               | BrA10 | 135,760   | AT5G50170 |           |   |
| BnA10 | sR6083    | 19.7 | BrA10_648054_414               | BrA10 | 648,054   | AT1G47640 |           |   |
| BnA10 | BGR71A    | 19.7 |                                |       |           |           |           |   |
| BnA10 | BGR64     | 19.7 |                                |       |           |           |           |   |
| BnA10 | BEN210    | 19.7 | BrA10_901957_108               | BrA10 | 901,957   | AT1G07420 | AT1G07420 | A |
| BnA10 | bnA3129   | 20.5 | BoC05_2322489_302              |       |           | AT1G06720 | AT1G06720 | A |
| BnA10 | sORH13B   | 21.3 | BrA10_1629861_259              | BrA10 | 1,629,861 | AT1G06640 | AT1G06640 | A |
| BnA10 | BoGMS197A | 21.8 | BrA10_6291918_156              |       |           | AT5G24540 |           |   |
| BnA10 | bnA5773   | 23.6 | BoScaffold000034_P1_1356708_56 |       |           | AT5G35615 |           |   |
| BnA10 | bnA3127   | 24   | BrA10_1513166_189              | BrA10 | 1,513,166 | AT1G06210 | AT1G06210 | A |
| BnA10 | bnA0209   | 24   | BrScaffold000123_387624_301    |       |           |           |           |   |
| BnA10 | bnA0213   | 24.1 | BrScaffold000123_306903_301    |       |           | AT2G03570 |           |   |
| BnA10 | bnA0205   | 24.2 | BrScaffold000291_24321_301     |       |           | AT3G63250 |           |   |
| BnA10 | bnA3135   | 24.3 | BrA10_284964_301               |       |           | AT2G37370 | AT2G37370 | J |
| BnA10 | bnA0364   | 24.4 | BrScaffold000123_221988_293    |       |           | AT2G45060 | AT2G45060 | J |
| BnA10 | bnA4678   | 24.4 | BrA10_3725683_301              | BrA10 | 3,725,683 | AT4G22540 |           |   |
| BnA10 | bnA3106   | 24.4 | BrA01_18702013_301             |       |           | AT2G04041 |           |   |
| BnA10 | bnA5520   | 24.4 | BrScaffold000123_29982_302     |       |           | AT5G22355 | AT5G22355 | Q |
| BnA10 | bnA4639   | 24.5 | BrA02_22543533_301             |       |           | AT1G47497 |           |   |
| BnA10 | bnA3104   | 24.6 | BrA10_4969953_301              | BrA10 | 4,969,953 | AT5G28545 | AT5G28545 | Q |
| BnA10 | bnA5551   | 24.7 | BrA02_22682772_310             |       |           |           |           |   |
| BnA10 | bnA1468   | 24.8 | BrA02_22613210_254             |       |           | AT5G28593 | AT5G28593 | Q |
| BnA10 | bnA3134   | 25.1 | BrA10_379786_223               |       |           | AT5G49880 | AT5G49880 | W |
| BnA10 | bnA1815   | 26   | BrA10_6180843_301              | BrA10 | 6,180,843 | AT5G54300 | AT5G54300 | W |
| BnA10 | bnA1814   | 26.4 | BrA10_6199138_301              | BrA10 | 6,199,138 | AT4G10590 |           |   |
| BnA10 | bnA2697   | 27.5 | BrA10_6447037_301              | BrA10 | 6,447,037 | AT5G54730 | AT5G54730 | W |

|       |           |      |                             |       |           |           |           |   |
|-------|-----------|------|-----------------------------|-------|-----------|-----------|-----------|---|
| BnA10 | bnA3096   | 28.2 | BoC09_28296469_301          |       |           | AT4G23580 |           |   |
| BnA10 | bnA5771   | 28.2 | BoC09_28296469_301          |       |           | AT4G23580 |           |   |
| BnA10 | bnA3095   | 28.5 | BrA10_7355531_301           | BrA10 | 7,355,531 | AT5G56360 | AT5G56360 | W |
| BnA10 | bnA0262   | 30.1 | BrA04_12452903_297          |       |           | AT5G12440 |           |   |
| BnA10 | bnA5857   | 30.4 | BrScaffold000123_203127_301 |       |           | AT1G52880 |           |   |
| BnA10 | bnA1469   | 30.7 | BrA02_22693201_301          |       |           | AT3G37820 |           |   |
| BnA10 | bnA2899   | 30.7 | BrScaffold000369_8642_301   |       |           |           |           |   |
| BnA10 | bnA3087   | 30.7 | BrA10_7809191_301           | BrA10 | 7,809,191 | AT5G57123 | AT5G57123 | W |
| BnA10 | bnA3086   | 34.1 | BrA10_7906431_301           | BrA10 | 7,906,431 | AT5G57250 | AT5G57250 | W |
| BnA10 | bnA5770   | 34.1 | BrA10_7906431_301           | BrA10 | 7,906,431 | AT5G57250 | AT5G57250 | W |
| BnA10 | bnA4972   | 34.2 | BrA10_8285199_301           | BrA10 | 8,285,199 | AT5G58010 | AT5G58010 | W |
| BnA10 | bnA3091   | 34.3 | BrA10_7607081_299           | BrA10 | 7,607,081 | AT2G05700 |           |   |
| BnA10 | bnA0797   | 34.4 | BoC05_4605240_301           |       |           | AT4G29900 |           |   |
| BnA10 | bnA3082   | 34.5 | BrA10_8315472_301           | BrA10 | 8,315,472 | AT5G58110 | AT5G58110 | W |
| BnA10 | bnA5314   | 34.5 | BrA10_8315472_301           | BrA10 | 8,315,472 | AT5G58110 | AT5G58110 | W |
| BnA10 | BoGMS1199 | 36.4 |                             |       |           |           |           |   |
| BnA10 | BnEMS1185 | 36.9 | BrA10_8369776_218           | BrA10 | 8,369,776 | AT5G58375 | AT5G58375 | W |
| BnA10 | bnA3079   | 38   | BrA10_8387305_300           | BrA10 | 8,387,305 | AT5G58440 | AT5G58440 | W |
| BnA10 | bnA3074   | 38   | BrA10_8564289_304           | BrA10 | 8,564,289 | AT5G58890 | AT5G58890 | W |
| BnA10 | bnA5704   | 38.7 | BrScaffold000123_244680_301 |       |           | AT1G67840 |           |   |
| BnA10 | bnA5936   | 38.7 | BrA10_8766904_259           | BrA10 | 8,766,904 | AT5G57380 |           |   |
| BnA10 | bnA5889   | 38.7 | BrA10_8766904_259           | BrA10 | 8,766,904 | AT5G57380 |           |   |
| BnA10 | bnA3069   | 39   | BrA10_8857702_301           | BrA10 | 8,857,702 | AT5G59460 | AT5G59460 | W |
| BnA10 | bnA1597   | 39   | BrA09_25072577_299          |       |           | AT1G67105 |           |   |
| BnA10 | bnA5766   | 39.5 | BrA10_9122134_302           | BrA10 | 9,122,134 | AT2G19910 |           |   |
| BnA10 | bnA5765   | 39.5 | BrA10_9187027_301           | BrA10 | 9,187,027 | AT5G60210 | AT5G60210 | W |

|       |         |      |                          |       |            |           |           |   |
|-------|---------|------|--------------------------|-------|------------|-----------|-----------|---|
| BnA10 | bnA3059 | 40.3 | BrA10_9327235_301        | BrA10 | 9,327,235  | AT5G60550 | AT5G60550 | X |
| BnA10 | bnA3081 | 42.3 | BoC09_26000052_293       |       |            | AT5G66330 | AT5G66330 | X |
| BnA10 | bnA5544 | 49.7 | BrA09_31314801_290       |       |            | AT5G50920 |           |   |
| BnA10 | bnA5009 | 61.2 | BrA10_13224157_301       | BrA10 | 13,224,157 | AT5G05840 |           |   |
| BnA10 | bnA5761 | 63.2 | BrA10_13407917_302       | BrA10 | 13,407,917 | AT5G15550 | AT5G15550 | R |
| BnA10 | bnA5933 | 63.2 | BrA10_13429404_301       | BrA10 | 13,429,404 | AT5G15500 | AT5G15500 | R |
| BnA10 | bnA4676 | 64.7 | BoC09_33861997_259       |       |            | AT5G14690 | AT5G14690 | R |
| BnA10 | bnA5019 | 64.7 | BoC09_33861997_259       |       |            | AT5G14690 | AT5G14690 | R |
| BnA10 | BEN312  | 65.6 |                          |       |            | AT5G14580 | AT5G14580 | R |
| BnA10 | BGO090  | 65.6 | BrA10_13726214_212       | BrA10 | 13,726,214 | AT5G14460 | AT5G14460 | R |
| BnA10 | bnA3021 | 66.4 | BrA10_13734397_303       | BrA10 | 13,734,397 | AT5G14420 | AT5G14420 | R |
| BnA10 | bnA3020 | 66.4 | BrA10_13749676_299       | BrA10 | 13,749,676 | AT5G14370 | AT5G14370 | R |
| BnA10 | bnA5310 | 66.7 | BrA10_13938715_302       | BrA10 | 13,938,715 | AT5G13670 | AT5G13670 | R |
| BnA10 | bnA3016 | 66.7 | BrA10_13938715_302       | BrA10 | 13,938,715 | AT5G13670 | AT5G13670 | R |
| BnA10 | bnA3010 | 67.8 | BrA10_14254838_301       | BrA10 | 14,254,838 | AT5G12480 | AT5G12480 | R |
| BnA10 | bnA5177 | 68.1 | BrA10_14313425_301       | BrA10 | 14,313,425 | AT5G12400 | AT5G12400 | R |
| BnA10 | bnA3009 | 68.1 | BrA10_14313425_301       | BrA10 | 14,313,425 | AT5G12400 | AT5G12400 | R |
| BnA10 | bnA5759 | 68.7 | BrA10_14370230_311       | BrA10 | 14,370,230 | AT5G12210 | AT5G12210 | R |
| BnA10 | bnA3000 | 69   | BrA10_14646372_302       | BrA10 | 14,646,372 | AT5G11420 | AT5G11420 | R |
| BnA10 | bnA5655 | 70.7 | BrScaffold001837_576_301 |       |            | AT2G22795 |           |   |
| BnA10 | bnA2270 | 70.7 | BrScaffold001837_576_301 |       |            | AT2G22795 |           |   |
| BnA10 | bnA2997 | 70.7 | BrA10_14697676_302       | BrA10 | 14,697,676 | AT5G11260 | AT5G11260 | R |
| BnA10 | bnA5756 | 70.7 | BrA10_14697676_302       | BrA10 | 14,697,676 | AT5G11260 | AT5G11260 | R |
| BnA10 | bnA2989 | 72.5 | BrA10_15031960_301       | BrA10 | 15,031,960 | AT5G10200 | AT5G10200 | R |
| BnA10 | bnA2974 | 72.5 | BoC09_37549777_301       |       |            | AT5G09430 | AT5G09430 | R |
| BnA10 | bnA2973 | 72.5 | BrA10_16433391_205       | BrA10 | 16,433,391 | AT2G06860 |           |   |

|       |           |      |                    |       |            |           |           |   |
|-------|-----------|------|--------------------|-------|------------|-----------|-----------|---|
| BnA10 | bnA5749   | 72.5 | BrA10_16433391_205 | BrA10 | 16,433,391 | AT2G06860 |           |   |
| BnA10 | BnEMS1173 | 78   | BrA10_15360864_275 | BrA10 | 15,360,864 | AT5G05750 | AT5G05750 | R |
| BnA10 | BnEMS1156 | 78.3 |                    |       |            |           |           |   |
| BnA10 | bnA5471   | 80.5 | BrA10_15331714_302 | BrA10 | 15,331,714 | AT5G05670 | AT5G05670 | R |
| BnA10 | bnA0874   | 81   | BrA10_16503144_298 | BrA10 | 16,503,144 | AT5G04990 | AT5G04990 | R |
| BnA10 | bnA3242   | 84.3 | BrA01_9626079_301  |       |            | AT4G27020 |           |   |
| BnA10 | bnA1805   | 84.6 | BrA10_17449798_261 | BrA10 | 17,449,798 | AT5G02070 | AT5G02070 | R |
| BnA10 | bnA2968   | 84.6 | BrA10_17501817_301 | BrA10 | 17,501,817 | AT5G01120 | AT5G01120 | R |
| BnA10 | BnGMS175  | 86   |                    |       |            |           |           |   |
| BnA10 | BnEMS812  | 90.3 |                    |       |            |           |           |   |
| BnC01 | bnA2225   | 0    | BrA06_1840122_301  |       |            | AT1G57590 |           |   |
| BnC01 | bnA2216   | 1.6  | BrA06_1168297_301  | BrA06 | 1,168,297  | AT1G51860 |           |   |
| BnC01 | bnA5716   | 1.9  | BrA06_26268826_297 |       |            | AT4G38360 | AT4G38360 | U |
| BnC01 | bnA0385   | 1.9  | BrA01_8207233_301  |       |            | AT5G28635 |           |   |
| BnC01 | bnA2770   | 1.9  | BrA06_26268826_297 |       |            | AT4G38360 | AT4G38360 | U |
| BnC01 | BGR16     | 2.9  |                    |       |            |           |           |   |
| BnC01 | BGO160    | 3.2  |                    |       |            |           |           |   |
| BnC01 | BEN391B   | 4.6  |                    |       |            |           |           |   |
| BnC01 | bnA2219   | 7    | BrA06_1480375_301  | BrA06 | 1,480,375  | AT1G50920 | AT1G50920 | C |
| BnC01 | bnA5093   | 7.4  | BrA06_1480375_301  | BrA06 | 1,480,375  | AT1G50920 | AT1G50920 | C |
| BnC01 | bnA2220   | 8.5  | BrA06_1529976_301  | BrA06 | 1,529,976  | AT1G50660 | AT1G50660 | C |
| BnC01 | bnA5645   | 8.5  | BrA06_1613040_317  | BrA06 | 1,613,040  | AT1G50460 | AT1G50460 | C |
| BnC01 | bnA2222   | 8.5  | BrA06_1613040_317  | BrA06 | 1,613,040  | AT1G50460 | AT1G50460 | C |
| BnC01 | bnA2228   | 9.4  | BrA06_2261818_301  | BrA06 | 2,261,818  | AT2G42270 |           |   |
| BnC01 | bnA4787   | 9.7  | BrA06_2542572_301  | BrA06 | 2,542,572  | AT2G04042 |           |   |
| BnC01 | BoGMS1303 | 10.3 |                    |       |            |           |           |   |

|       |         |      |                              |       |            |           |           |   |
|-------|---------|------|------------------------------|-------|------------|-----------|-----------|---|
| BnC01 | bnA5649 | 13.5 | BrA06_2902867_301            | BrA06 | 2,902,867  | AT1G08400 | AT1G08400 | A |
| BnC01 | bnA2234 | 15.2 | BrA06_2756643_296            |       |            | AT1G08065 | AT1G08065 | A |
| BnC01 | sN9425  | 29.5 | BoC01_11302996_367           | BoC01 | 11,302,996 | AT5G55920 | AT5G55920 | X |
| BnC01 | bnA5024 | 31.1 | BoC01_11284149_301           | BoC01 | 11,284,149 | AT5G65630 | AT5G65630 | X |
| BnC01 | bnA5483 | 31.1 | BoC01_11261704_301           | BoC01 | 11,261,704 | AT1G21200 |           |   |
| BnC01 | bnA3197 | 31.4 | BoC01_11212130_301           | BoC01 | 11,212,130 | AT4G18960 |           |   |
| BnC01 | bnA3196 | 31.7 | BoC06_35205331_302           |       |            | AT3G60565 |           |   |
| BnC01 | bnA4694 | 31.7 | BoC01_11284149_301           | BoC01 | 11,284,149 | AT5G65630 | AT5G65630 | X |
| BnC01 | bnA5060 | 31.7 | BoC01_11218340_301           | BoC01 | 11,218,340 | AT4G24970 | AT4G24970 | U |
| BnC01 | bnA3198 | 32.2 | BoC01_11204317_301           | BoC01 | 11,204,317 | AT4G24940 | AT4G24940 | U |
| BnC01 | bnA3199 | 32.7 | BoC01_19550059_174           |       |            | AT5G45095 |           |   |
| BnC01 | bnA4878 | 33.6 | BoScaffold000024_2832841_302 |       |            | AT3G50625 |           |   |
| BnC01 | bnA3206 | 33.6 | BoC06_31921522_291           |       |            | AT2G19840 |           |   |
| BnC01 | bnA3203 | 33.6 | BoC01_11024274_301           | BoC01 | 11,024,274 | AT4G24440 | AT4G24440 | U |
| BnC01 | bnA3207 | 33.6 | BoC01_10912713_298           | BoC01 | 10,912,713 | AT2G04490 |           |   |
| BnC01 | bnA5826 | 33.6 | BoC01_10912713_298           | BoC01 | 10,912,713 | AT2G04490 |           |   |
| BnC01 | bnA5025 | 33.6 | BoScaffold000024_2832965_301 |       |            | AT5G19090 |           |   |
| BnC01 | bnA5825 | 33.6 | BoC06_31921803_301           |       |            |           |           |   |
| BnC01 | BEN6    | 36.4 | BoC01_10755773_281           | BoC01 | 10,755,773 | AT4G24110 | AT4G24110 | U |
| BnC01 | bnA5109 | 38.1 | BoC01_10695936_301           | BoC01 | 10,695,936 | AT4G24040 | AT4G24040 | U |
| BnC01 | bnA3211 | 38.1 | BoC01_10693467_301           | BoC01 | 10,693,467 | AT4G24040 | AT4G24040 | U |
| BnC01 | bnA3212 | 38.1 | BoC01_10671090_301           | BoC01 | 10,671,090 |           |           |   |
| BnC01 | bnA3210 | 38.3 | BoC01_10738704_301           | BoC01 | 10,738,704 | AT5G54510 |           |   |
| BnC01 | bnA4695 | 38.4 | BoC09_34391901_189           |       |            | AT4G07496 |           |   |
| BnC01 | bnA0605 | 48.5 | BoScaffold000354_123402_295  |       |            | AT1G43020 |           |   |
| BnC01 | BEN348  | 55.3 | BoC01_14211979_313           | BoC01 | 14,211,979 | AT5G54510 |           |   |

|       |         |      |                              |       |            |           |           |   |
|-------|---------|------|------------------------------|-------|------------|-----------|-----------|---|
| BnC01 | bnA3249 | 56.2 | BoC01_13821490_301           | BoC01 | 13,821,490 | AT3G03660 |           |   |
| BnC01 | bnA2009 | 56.2 | BrA09_6090407_302            |       |            | AT1G15280 |           |   |
| BnC01 | bnA0969 | 56.5 | BoScaffold000127_1253028_301 |       |            | AT4G28380 |           |   |
| BnC01 | bnA3760 | 57.8 | BoScaffold000424_146746_302  |       |            | AT4G13575 |           |   |
| BnC01 | bnA1032 | 58.4 | BoC04_5903411_257            |       |            | AT3G45253 |           |   |
| BnC01 | bnA0792 | 58.4 | BoScaffold000127_609513_281  |       |            | AT2G27760 |           |   |
| BnC01 | bnA3247 | 61   | BoScaffold000338_130703_302  |       |            | AT5G23800 | AT5G23800 | Q |
| BnC01 | bnA3244 | 61.5 | BoC05_9312267_188            |       |            | AT3G02960 |           |   |
| BnC01 | bnA4696 | 62   | BoC06_12911807_301           |       |            | AT5G27238 | AT5G27238 | Q |
| BnC01 | bnA3243 | 62   | BrA04_2359134_301            |       |            | AT5G28300 | AT5G28300 | Q |
| BnC01 | bnA3324 | 63.4 | BoC01_14276456_301           | BoC01 | 14,276,456 | AT5G28487 | AT5G28487 | Q |
| BnC01 | bnA3320 | 63.4 | BoScaffold000361_48863_301   |       |            | AT5G29015 | AT5G29015 | Q |
| BnC01 | bnA0701 | 63.4 | BoScaffold000237_639353_294  |       |            | AT5G46960 | AT5G46960 | V |
| BnC01 | bnA0532 | 64.4 | BoScaffold000337_4413_301    |       |            | AT5G42930 | AT5G42930 | V |
| BnC01 | bnA5841 | 65.5 | BoC01_14300995_301           | BoC01 | 14,300,995 | AT5G32022 | AT5G32022 | S |
| BnC01 | bnA3326 | 65.5 | BoC01_14301103_301           | BoC01 | 14,301,103 | AT5G32022 | AT5G32022 | S |
| BnC01 | bnA3335 | 65.5 | BoC01_16340725_301           |       |            | AT5G50915 |           |   |
| BnC01 | bnA2979 | 67.8 | BoC04_10825273_249           |       |            | AT1G62510 |           |   |
| BnC01 | bnA0832 | 68.8 | BoC01_17141760_301           |       |            | AT4G02960 |           |   |
| BnC01 | bnA3327 | 69.3 | BoC01_14319520_264           | BoC01 | 14,319,520 | AT5G34930 | AT5G34930 | S |
| BnC01 | bnA5437 | 69.3 | BoC01_14403643_301           | BoC01 | 14,403,643 |           |           |   |
| BnC01 | bnA0891 | 69.3 | BoC01_14522842_301           | BoC01 | 14,522,842 | AT4G07760 |           |   |
| BnC01 | bnA3338 | 69.3 | BoC01_14848536_301           | BoC01 | 14,848,536 | AT5G32431 | AT5G32431 | S |
| BnC01 | bnA0665 | 69.3 | BoC01_16040336_301           | BoC01 | 16,040,336 | AT3G47740 | AT3G47740 | M |
| BnC01 | bnA3316 | 69.3 | BoScaffold000361_123005_301  |       |            | AT3G48740 | AT3G48740 | M |
| BnC01 | bnA3336 | 69.3 | BoC08_10783461_307           |       |            |           |           |   |



|       |           |       |                             |       |            |           |           |   |
|-------|-----------|-------|-----------------------------|-------|------------|-----------|-----------|---|
| BnC01 | bna3312   | 69.5  | BoScaffold000361_162937_301 |       |            | AT3G48740 | AT3G48740 | M |
| BnC01 | bna3314   | 69.7  | BoScaffold000361_140793_301 |       |            | AT2G04035 |           | M |
| BnC01 | bna3310   | 69.8  | BoScaffold000361_218671_301 |       |            | AT3G48810 | AT3G48810 | M |
| BnC01 | bna3319   | 69.9  | BoScaffold000361_58170_301  |       |            | AT1G13300 | AT1G13300 | A |
| BnC01 | bna3313   | 70    | BoScaffold000361_152166_300 |       |            | AT1G02930 | AT1G02930 | A |
| BnC01 | bna3325   | 70.1  | BoC01_14285456_301          |       |            | AT4G20095 |           |   |
| BnC01 | bna3330   | 70.2  | BoC01_14397348_301          |       |            | AT1G75680 |           |   |
| BnC01 | BoGMS622  | 73.6  |                             |       |            |           |           |   |
| BnC01 | BoGMS1246 | 76.4  |                             |       |            |           |           |   |
| BnC01 | sS1867A   | 76.7  |                             |       |            |           |           |   |
| BnC01 | CB10258   | 77    |                             |       |            |           |           |   |
| BnC01 | Na12-C08  | 78.5  |                             |       |            | AT2G36080 |           |   |
| BnC01 | bna5239   | 81.8  | BoC01_21703665_246          | BoC01 | 21,703,665 | AT4G04920 |           |   |
| BnC01 | bna0574   | 82.8  | BoC01_29077523_285          | BoC01 | 29,077,523 | AT3G21290 | AT3G21290 | F |
| BnC01 | BoGMS1399 | 85.9  |                             |       |            |           |           |   |
| BnC01 | bna3342   | 87.8  | BoC01_31074192_301          | BoC01 | 31,074,192 | AT3G52200 |           |   |
| BnC01 | bna3343   | 87.8  | BoC01_31149562_301          | BoC01 | 31,149,562 | AT5G35935 |           |   |
| BnC01 | sN3523R   | 88.3  | BoC01_31581658_199          | BoC01 | 31,581,658 | AT3G18300 | AT3G18300 | F |
| BnC01 | bna5879   | 88.8  | BoC01_31086172_301          | BoC01 | 31,086,172 | AT2G22990 |           |   |
| BnC01 | bna0941   | 88.8  | BoC01_30797471_301          | BoC01 | 30,797,471 | AT1G01400 |           |   |
| BnC01 | bna0553   | 89.1  | BoC01_31930694_301          | BoC01 | 31,930,694 | AT1G23160 |           |   |
| BnC01 | bna0988   | 91    | BoC03_24421151_301          |       |            | AT4G06555 |           |   |
| BnC01 | bna3357   | 91.3  | BoC03_50713788_301          |       |            | AT4G04410 |           |   |
| BnC01 | bna3350   | 92.4  | BoC01_32625067_301          | BoC01 | 32,625,067 | AT3G16630 | AT3G16630 | F |
| BnC01 | BoGMS561  | 98    | BoC01_36186383_144          | BoC01 | 36,186,383 | AT3G12120 | AT3G12120 | F |
| BnC01 | bna5517   | 100.6 | BrA01_27667920_301          |       |            | AT3G09230 | AT3G09230 | F |

|       |           |       |                             |       |            |           |           |   |  |
|-------|-----------|-------|-----------------------------|-------|------------|-----------|-----------|---|--|
| BnC01 | BEN32B    | 101.6 | BoC01_38372637_153          | BoC01 | 38,372,637 | AT3G07790 |           |   |  |
| BnC01 | BEN410    | 101.9 | BoC01_37885135_241          | BoC01 | 37,885,135 | AT3G08505 | AT3G08505 | F |  |
| BnC01 | bnal286   | 103.4 | BrA01_27902747_299          |       |            | AT3G07590 | AT3G07590 | F |  |
| BnC01 | bnal0878  | 103.7 | BoC07_23218661_179          |       |            | AT2G16420 |           |   |  |
| BnC01 | bnal290   | 103.7 | BrA01_27968734_301          |       |            | AT3G07280 | AT3G07280 | F |  |
| BnC01 | bnal3369  | 104   | BrA01_28250786_301          |       |            | AT3G06190 | AT3G06190 | F |  |
| BnC01 | bnal298   | 104.8 | BrA01_28260995_301          |       |            | AT3G06070 | AT3G06070 | F |  |
| BnC01 | bnal272   | 106.1 | BrA01_25120365_93           |       |            | AT3G02360 | AT3G02360 | F |  |
| BnC01 | BRAS074A  | 108.2 |                             |       |            | AT4G08960 |           |   |  |
| BnC01 | bnal4598  | 121.8 | BoScaffold000338_32239_301  |       |            | AT2G47790 |           |   |  |
| BnC01 | bnal0648  | 123.8 | BoScaffold000232_160965_301 |       |            | AT1G43770 |           |   |  |
| BnC01 | bnal0225  | 144.9 | BrA10_16110047_317          |       |            | AT5G07830 |           |   |  |
| BnC01 | bnal4804  | 152.1 | BrA01_4737322_301           |       |            | AT4G18130 |           |   |  |
| BnC01 | bnal5274  | 168.7 | BrA02_3965136_301           |       |            | AT5G16490 | AT5G16490 | R |  |
| BnC01 | bnal1346  | 168.7 | BrA02_3934592_289           |       |            | AT5G16290 | AT5G16290 | R |  |
| BnC01 | bnal5366  | 176.9 | BrA01_8122629_301           |       |            | AT5G51060 |           |   |  |
| BnC01 | bnal0317  | 177.2 | BrA01_8388907_301           |       |            | AT5G52470 |           |   |  |
| BnC01 | bnal0318  | 177.2 | BrA01_8395801_301           |       |            | AT4G25650 | AT4G25650 | U |  |
| BnC01 | bnal1166  | 177.2 | BrA01_8417463_207           |       |            | AT4G25720 | AT4G25720 | U |  |
| BnC01 | bnal1180  | 178.4 | BrA01_9269777_301           |       |            | AT5G03890 |           |   |  |
| BnC01 | bnal1174  | 180.2 | BrA01_10000380_303          |       |            | AT1G26670 |           |   |  |
| BnC01 | bnal5500  | 180.5 | BrA01_11951455_301          |       |            | AT5G46820 |           |   |  |
| BnC01 | bnal270   | 190.1 | BrScaffold000164_308660_301 |       |            | AT2G23950 |           |   |  |
| BnC02 | BrGMS231B | 0     |                             |       |            |           |           |   |  |
| BnC02 | BGO054    | 1.1   |                             |       |            |           |           |   |  |
| BnC02 | BrGMS231A | 2.2   |                             |       |            |           |           |   |  |

|       |           |      |                            |       |            |           |           |   |
|-------|-----------|------|----------------------------|-------|------------|-----------|-----------|---|
| BnC02 | bnA5066   | 2.8  | BrA07_20511170_301         | BrA07 | 20,511,170 | AT1G75310 | AT1G75310 | E |
| BnC02 | bnA2588   | 2.8  | BrA07_21918751_301         | BrA07 | 21,918,751 | AT3G25610 |           | E |
| BnC02 | bnA2584   | 3.5  | BrA07_21529099_298         | BrA07 | 21,529,099 | AT1G77800 | AT1G77800 | E |
| BnC02 | bnA2585   | 3.8  | BoC07_943422_239           |       |            | AT1G78020 | AT1G78020 | E |
| BnC02 | bnA5215   | 3.8  | BrA07_21637773_301         | BrA07 | 21,637,773 | AT4G09467 |           | E |
| BnC02 | BEN425    | 29.8 |                            |       |            |           |           |   |
| BnC02 | MR52a     | 35.7 | BoC02_6520290_134          | BoC02 | 6,520,290  | AT5G35680 |           |   |
| BnC02 | bnA0442   | 41.2 | BoC02_8604252_305          |       |            | AT3G11880 |           |   |
| BnC02 | bnA1358   | 41.5 | BrA02_5592528_299          |       |            | AT5G22760 | AT5G22760 | R |
| BnC02 | bnA1356   | 41.8 | BrA02_5301560_301          |       |            | AT5G21326 | AT5G21326 | R |
| BnC02 | bnA5529   | 42.1 | BoC02_5955002_301          |       |            | AT5G21140 | AT5G21140 | R |
| BnC02 | bnA1361   | 42.3 | BrA02_5924413_148          |       |            | AT5G52520 |           |   |
| BnC02 | bnA3388   | 42.6 | BoScaffold000024_98819_301 |       |            | AT3G29078 |           |   |
| BnC02 | bnA5532   | 42.6 | BrA02_6228686_200          |       |            | AT5G59290 |           |   |
| BnC02 | bnA1353   | 42.9 | BrA02_4295817_301          |       |            | AT5G17710 | AT5G17710 | R |
| BnC02 | bnA1352   | 42.9 | BrA02_4240951_301          |       |            | AT5G17530 | AT5G17530 | R |
| BnC02 | bnA1350   | 44   | BrA02_4137450_301          |       |            | AT5G17170 | AT5G17170 | R |
| BnC02 | BnEMS1119 | 45.5 | BoC02_7359570_209          | BoC02 | 7,359,570  | AT2G34820 |           |   |
| BnC02 | BrGMS268  | 45.5 | BoC02_7359632_296          | BoC02 | 7,359,632  | AT5G31087 |           |   |
| BnC02 | BRAS083   | 45.5 | BoC02_7413861_156          | BoC02 | 7,413,861  | AT5G17690 | AT5G17690 | R |
| BnC02 | BEN134    | 46   | BoC02_8463131_197          | BoC02 | 8,463,131  | AT3G01400 |           |   |
| BnC02 | sN3761A   | 46.8 | BoC02_9227135_179          | BoC02 | 9,227,135  | AT5G57510 | AT5G57510 | W |
| BnC02 | BoGMS328  | 47.3 |                            |       |            |           |           |   |
| BnC02 | BEN396    | 48.1 |                            |       |            |           |           |   |
| BnC02 | bnA0551   | 50.9 | BoC02_10311145_301         | BoC02 | 10,311,145 | AT5G55520 | AT5G55520 | W |
| BnC02 | bnA4700   | 51   | BoC02_11100426_239         | BoC02 | 11,100,426 | AT5G54510 | AT5G54510 | W |

|       |         |      |                                 |       |            |           |           |   |
|-------|---------|------|---------------------------------|-------|------------|-----------|-----------|---|
| BnC02 | bna3410 | 51.1 | BoC02_10914216_301              | BoC02 | 10,914,216 | AT5G54730 | AT5G54730 | W |
| BnC02 | bna3413 | 51.2 | BoC02_10734477_301              | BoC02 | 10,734,477 |           |           |   |
| BnC02 | bna3409 | 51.2 | BoC01_28896212_301              |       |            | AT2G05915 |           |   |
| BnC02 | bna3392 | 51.2 | BoC02_11087706_230              | BoC02 | 11,087,706 | AT5G22440 |           |   |
| BnC02 | bna4963 | 51.4 | BoScaffold000024_58713_299      |       |            | AT4G05145 |           |   |
| BnC02 | bna3384 | 51.6 | BoScaffold000344_317376_304     |       |            | AT5G54300 | AT5G54300 | W |
| BnC02 | bna3385 | 51.6 | BoScaffold000344_348629_302     |       |            | AT5G54280 | AT5G54280 | W |
| BnC02 | bna3383 | 51.6 | BrA10_7152347_268               |       |            | AT2G21590 |           |   |
| BnC02 | bna3386 | 52.3 | BoScaffold000024_11794_301      |       |            | AT5G54250 | AT5G54250 | W |
| BnC02 | bna3380 | 52.5 | BoC06_26158817_188              |       |            | AT4G17800 |           |   |
| BnC02 | bna3375 | 52.7 | BoC06_26016799_299              |       |            | AT3G10290 |           |   |
| BnC02 | bna3379 | 52.7 | BoC06_26117133_301              |       |            | AT5G53770 | AT5G53770 | W |
| BnC02 | bna3371 | 52.7 | BoC06_25893091_286              |       |            | AT5G53550 | AT5G53550 | W |
| BnC02 | bna3387 | 52.7 | BoScaffold000024_78841_304      |       |            | AT5G11660 |           |   |
| BnC02 | bna3389 | 52.7 | BoScaffold000024_319346_301     |       |            | AT1G62940 |           |   |
| BnC02 | bna2583 | 54.8 | BrA07_21437273_301              |       |            | AT1G77390 |           |   |
| BnC02 | bna3517 | 56.5 | BoScaffold000001_P2_387136_301  |       |            | AT3G27330 |           |   |
| BnC02 | bna3522 | 56.7 | BoScaffold000001_P2_243108_301  |       |            | AT5G52410 | AT5G52410 | W |
| BnC02 | bna3525 | 56.9 | BrA02_8653202_301               |       |            | AT5G52470 | AT5G52470 | W |
| BnC02 | bna4983 | 57.9 | BoScaffold000001_P2_168438_302  |       |            | AT3G05415 |           |   |
| BnC02 | bna3524 | 58   | BoScaffold000001_P2_214096_301  |       |            | AT5G24030 |           |   |
| BnC02 | bna3519 | 58   | BoScaffold000001_P2_358314_297  |       |            | AT1G71480 |           |   |
| BnC02 | bna3520 | 58.8 | BoScaffold000001_P2_334963_301  |       |            | AT2G21410 |           |   |
| BnC02 | bna4791 | 60.1 | BoScaffold000001_P2_714220_301  |       |            | AT5G51812 | AT5G51812 | W |
| BnC02 | bna5942 | 61.3 | BoScaffold000001_P2_669898_302  |       |            | AT1G32530 |           |   |
| BnC02 | bna3505 | 62.2 | BoScaffold000001_P2_1178512_301 |       |            | AT2G37670 |           |   |

|       |           |       |                                |       |            |           |           |   |
|-------|-----------|-------|--------------------------------|-------|------------|-----------|-----------|---|
| BnC02 | bna3508   | 62.2  | BoScaffold000001_P2_629586_302 |       |            | AT3G33197 |           |   |
| BnC02 | bna3510   | 62.2  | BoScaffold000001_P2_541721_301 |       |            | AT5G52050 | AT5G52050 | W |
| BnC02 | O113-G05  | 63.8  |                                |       |            |           |           |   |
| BnC02 | BEN281A   | 65.6  | BoC02_11649330_219             | BoC02 | 11,649,330 | AT1G67730 | AT1G67730 | E |
| BnC02 | Na12-H09  | 66.8  |                                |       |            | AT4G21850 |           |   |
| BnC02 | O109-A06A | 67.7  | BoC02_26800345_89              |       |            |           |           |   |
| BnC02 | bna3862   | 70.1  | BoC02_16785367_301             | BoC02 | 16,785,367 | AT1G73650 | AT1G73650 | E |
| BnC02 | bna3863   | 70.1  | BoC02_16849058_301             | BoC02 | 16,849,058 | AT5G59720 |           |   |
| BnC02 | bna3864   | 70.1  | BoC02_17022146_301             | BoC02 | 17,022,146 | AT2G04520 |           |   |
| BnC02 | bna1423   | 70.4  | BrA02_13167839_301             |       |            | AT1G73680 | AT1G73680 | E |
| BnC02 | BGO146    | 95.4  |                                |       |            | AT1G15460 |           |   |
| BnC02 | bna1432   | 97.2  | BrA02_14903333_301             |       |            | AT3G31442 |           |   |
| BnC02 | bna1223   | 97.6  | BoC05_1773758_301              |       |            | AT4G30872 |           |   |
| BnC02 | bna5051   | 98.6  | BrA05_9241979_297              |       |            | AT5G62370 |           |   |
| BnC02 | bna0619   | 99.4  | BrA05_6407217_297              |       |            | AT2G05040 |           |   |
| BnC02 | bna0309   | 100.5 | BoC02_24685579_301             | BoC02 | 24,685,579 | AT4G02260 |           |   |
| BnC02 | bna5545   | 100.5 | BoC02_24759788_303             | BoC02 | 24,759,788 | AT2G22780 |           |   |
| BnC02 | bna1439   | 100.5 | BrA02_15879592_265             | BrA02 | 15,879,592 | AT1G80370 | AT1G80370 | E |
| BnC02 | bna1440   | 100.5 | BrA02_16588127_301             | BrA02 | 16,588,127 | AT4G39400 |           |   |
| BnC02 | bna2134   | 101.2 | BrA05_9166879_314              |       |            | AT4G02460 | AT4G02460 | O |
| BnC02 | bna2136   | 101.5 | BrA05_9054410_303              |       |            | AT4G02600 | AT4G02600 | O |
| BnC02 | bna2135   | 101.8 | BrA05_9080490_301              |       |            | AT3G05210 |           |   |
| BnC02 | bna4836   | 102.8 | BrA02_19401694_301             | BrA02 | 19,401,694 | AT5G37150 |           |   |
| BnC02 | bna5209   | 102.8 | BrA02_19573717_301             | BrA02 | 19,573,717 | AT5G47420 | AT5G47420 | V |
| BnC02 | bna2268   | 102.8 | BrA02_19573717_301             | BrA02 | 19,573,717 | AT5G47420 | AT5G47420 | V |
| BnC02 | BGR58     | 103.3 | BoC02_33628790_105             |       |            | AT5G47500 | AT5G47500 | V |

|       |           |       |                    |       |            |           |           |   |
|-------|-----------|-------|--------------------|-------|------------|-----------|-----------|---|
| BnC02 | bnA5035   | 104.1 | BrA02_19401939_301 | BrA02 | 19,401,939 | AT5G19610 |           |   |
| BnC02 | bnA1455   | 104.1 | BrA02_19646538_297 | BrA02 | 19,646,538 | AT5G47530 | AT5G47530 | V |
| BnC02 | bnA5627   | 105.5 | BoC02_33293315_168 |       |            | AT4G35590 |           |   |
| BnC02 | BEN296    | 108.9 |                    |       |            | AT5G09790 |           |   |
| BnC02 | bnA5548   | 109.9 | BoC02_36430470_302 |       |            | AT3G49650 |           |   |
| BnC02 | bnA1472   | 111.5 | BrA02_22157503_301 | BrA02 | 22,157,503 | AT2G02670 | AT2G02670 | K |
| BnC02 | bnA5552   | 111.5 | BrA02_22157503_301 | BrA02 | 22,157,503 | AT2G02670 | AT2G02670 | K |
| BnC02 | bnA1473   | 111.5 | BrA02_22357115_301 | BrA02 | 22,357,115 | AT3G26750 |           |   |
| BnC02 | bnA5554   | 112.4 | BrA02_23362692_299 | BrA02 | 23,362,692 | AT5G46590 |           |   |
| BnC02 | bnA5556   | 114.5 | BrA02_24201837_301 | BrA02 | 24,201,837 | AT2G14365 | AT2G14365 | K |
| BnC02 | bnA1490   | 114.8 | BrA02_24269285_301 | BrA02 | 24,269,285 | AT5G27970 | AT5G27970 | Q |
| BnC02 | bnA1492   | 114.8 | BrA02_24456622_301 | BrA02 | 24,456,622 | AT5G27690 | AT5G27690 | Q |
| BnC02 | bnA1494   | 114.8 | BrA02_24580861_304 | BrA02 | 24,580,861 | AT5G26820 | AT5G26820 | Q |
| BnC02 | bnA1088   | 115.9 | BrA02_25898411_314 | BrA02 | 25,898,411 | AT5G61540 |           |   |
| BnC02 | bnA1087   | 116.3 | BrA02_26014141_254 | BrA02 | 26,014,141 | AT5G07300 |           |   |
| BnC02 | bnA1086   | 117   | BrA02_26034636_301 | BrA02 | 26,034,636 | AT5G61960 | AT5G61960 | X |
| BnC02 | bnA0664   | 117.5 | BrA02_26034248_221 | BrA02 | 26,034,248 | AT5G61960 | AT5G61960 | X |
| BnC02 | bnA0053   | 117.5 | BrA02_26164634_301 | BrA02 | 26,164,634 | AT4G07425 |           |   |
| BnC02 | BRMS-026  | 121.5 |                    |       |            |           |           |   |
| BnC02 | BEN14     | 124.9 |                    |       |            | AT5G62440 | AT5G62440 | X |
| BnC02 | bnA1080   | 127.1 | BrA02_27246329_302 | BrA02 | 27,246,329 | AT5G27010 |           |   |
| BnC03 | BnEMS824  | 0     |                    |       |            |           |           |   |
| BnC03 | BnEMS1171 | 0.8   | BoC03_56984210_644 | BoC03 | 56,984,210 | AT1G54080 |           |   |
| BnC03 | bnA0488   | 1.9   | BoC03_56831583_301 | BoC03 | 56,831,583 | AT5G35920 |           |   |
| BnC03 | BGR89     | 3.8   | BoC03_55727445_158 | BoC03 | 55,727,445 |           |           |   |
| BnC03 | BoGMS1153 | 4.6   |                    |       |            |           |           |   |

|       |           |      |                             |       |            |           |           |   |
|-------|-----------|------|-----------------------------|-------|------------|-----------|-----------|---|
| BnC03 | bnA0578   | 37   | BoC06_40640551_301          |       |            | AT2G34070 | AT2G34070 | J |
| BnC03 | BoGMS576  | 39.8 |                             |       |            |           |           |   |
| BnC03 | Na12-E02B | 41.6 |                             |       |            | AT1G17310 |           |   |
| BnC03 | BRAS120   | 44   | BoC03_8598996_193           | BoC03 | 8,598,996  | ATCG00480 |           |   |
| BnC03 | BoGMS693  | 44   |                             |       |            |           |           |   |
| BnC03 | bnA0584   | 49.5 | BoC03_8917659_299           | BoC03 | 8,917,659  | AT5G45000 |           |   |
| BnC03 | bnA0109   | 54.5 | BoC03_9403365_301           | BoC03 | 9,403,365  | AT2G36910 | AT2G36910 | J |
| BnC03 | O110-E05  | 56.5 | BoC03_9847453_95            | BoC03 | 9,847,453  | AT2G37840 | AT2G37840 | J |
| BnC03 | bnA3238   | 59   | BoC03_10671466_301          | BoC03 | 10,671,466 | AT2G39060 | AT2G39060 | J |
| BnC03 | bnA5831   | 59   | BoC03_10700524_301          | BoC03 | 10,700,524 | AT4G11375 |           |   |
| BnC03 | bnA3235   | 61.7 | BoC03_10826083_300          | BoC03 | 10,826,083 | AT2G39310 | AT2G39310 | J |
| BnC03 | bnA3234   | 62   | BoC03_10837267_301          | BoC03 | 10,837,267 | AT4G38640 |           |   |
| BnC03 | bnA5830   | 62   | BoC03_10837868_301          | BoC03 | 10,837,868 | AT4G38170 |           |   |
| BnC03 | bnA3232   | 62   | BoC03_10876501_299          | BoC03 | 10,876,501 | AT2G39620 | AT2G39620 | J |
| BnC03 | bnA0420   | 62.8 | BoScaffold000417_72597_301  |       |            | AT2G42330 | AT2G42330 | J |
| BnC03 | bnA0815   | 63.1 | BoC03_13119401_301          | BoC03 | 13,119,401 | AT2G40360 | AT2G40360 | J |
| BnC03 | bnA3642   | 64.1 | BoC03_14248590_301          | BoC03 | 14,248,590 | AT2G25290 |           |   |
| BnC03 | CB10057   | 65.8 | BoC03_14249960_197          | BoC03 | 14,249,960 | AT3G43250 |           |   |
| BnC03 | BRAS051A  | 65.8 |                             |       |            |           |           |   |
| BnC03 | sNRA56    | 65.8 | BoC03_14457833_251          | BoC03 | 14,457,833 | AT5G47770 |           |   |
| BnC03 | bnA4752   | 68   | BoC03_14715730_223          | BoC03 | 14,715,730 | AT5G27350 | AT5G27350 | Q |
| BnC03 | BRAS087A  | 70.2 | BoC03_16290437_171          | BoC03 | 16,290,437 | AT5G16220 |           |   |
| BnC03 | BRAS005   | 70.2 | BoC03_16290458_196          | BoC03 | 16,290,458 | AT5G25370 | AT5G25370 | Q |
| BnC03 | bnA1672   | 71.3 | BrA03_12402499_301          |       |            | AT4G09160 | AT4G09160 | P |
| BnC03 | bnA3691   | 71.3 | BoC03_16510429_301          | BoC03 | 16,510,429 | AT4G11160 | AT4G11160 | P |
| BnC03 | bnA3695   | 71.5 | BoScaffold000445_115904_301 |       |            | AT4G11660 | AT4G11660 | P |

|       |           |       |                             |       |            |           |           |   |
|-------|-----------|-------|-----------------------------|-------|------------|-----------|-----------|---|
| BnC03 | bnA3693   | 71.7  | BoScaffold000445_36202_301  |       |            | AT1G08290 |           |   |
| BnC03 | bnA3641   | 71.9  | BoC04_4765967_301           |       |            |           |           |   |
| BnC03 | bnA3694   | 72.1  | BoScaffold000445_93975_301  |       |            | AT1G31340 |           |   |
| BnC03 | bnA3696   | 72.2  | BoScaffold000445_129823_301 |       |            | AT1G65900 |           |   |
| BnC03 | bnA3697   | 72.3  | BoC03_17189721_301          | BoC03 | 17,189,721 | AT4G11910 | AT4G11910 | P |
| BnC03 | bnA3698   | 72.3  | BoC03_17198073_301          | BoC03 | 17,198,073 | AT5G48990 |           |   |
| BnC03 | bnA0810   | 73.1  | BoC03_17384693_301          | BoC03 | 17,384,693 | AT4G12460 | AT4G12460 | P |
| BnC03 | bnA0527   | 73.4  | BoC03_18059121_301          | BoC03 | 18,059,121 | AT1G80960 |           |   |
| BnC03 | BnGMS153  | 77.3  | BoC03_19715716_184          | BoC03 | 19,715,716 | AT3G01790 | AT3G01790 | F |
| BnC03 | bnA3665   | 78.4  | BoC03_19898731_291          | BoC03 | 19,898,731 | AT3G01070 | AT3G01070 | F |
| BnC03 | FITO007.2 | 82.1  |                             |       |            |           |           |   |
| BnC03 | bnA3725   | 84.6  | BoScaffold000040_247857_301 |       |            | AT3G09285 | AT3G09285 | F |
| BnC03 | bnA4359   | 84.6  | BoScaffold000040_345382_301 |       |            | AT1G42655 |           |   |
| BnC03 | bnA3728   | 84.9  | BoScaffold000040_77369_301  |       |            | AT5G67550 |           |   |
| BnC03 | bnA3726   | 84.9  | BoScaffold000040_222077_301 |       |            | AT3G09200 | AT3G09200 | F |
| BnC03 | bnA3753   | 87.8  | BoScaffold000366_83782_301  |       |            | AT5G26150 |           |   |
| BnC03 | BrGMS556  | 91.4  | BoC03_21360451_159          | BoC03 | 21,360,451 | AT3G13810 | AT3G13810 | F |
| BnC03 | BEN78     | 96.7  | BoC03_26376496_139          | BoC03 | 26,376,496 | AT1G04985 |           |   |
| BnC03 | BnGMS584A | 99.2  | BoC03_27306726_219          | BoC03 | 27,306,726 | AT5G52545 |           |   |
| BnC03 | bnA0400   | 100.1 | BoC03_27365297_301          | BoC03 | 27,365,297 | AT2G12462 |           |   |
| BnC03 | Na10-E02C | 102.9 |                             |       |            |           |           |   |
| BnC03 | Na10-E02B | 106.4 |                             |       |            |           |           |   |
| BnC03 | Na12-G05  | 107.8 |                             |       |            |           |           |   |
| BnC03 | bnA0842   | 109.4 | BoC07_28315359_306          |       |            | AT5G32470 |           |   |
| BnC03 | bnA0989   | 109.4 | BoC07_27998777_301          |       |            | AT4G06497 |           |   |
| BnC03 | bnA0711   | 109.4 | BoScaffold000389_119417_304 |       |            | AT5G05130 |           |   |



|       |          |       |                                |       |            |           |           |   |
|-------|----------|-------|--------------------------------|-------|------------|-----------|-----------|---|
| BnC03 | bnA0545  | 109.9 | BoC03_29474486_301             | BoC03 | 29,474,486 | AT1G66960 |           |   |
| BnC03 | bnA0960  | 110.4 | BoC03_29818084_301             | BoC03 | 29,818,084 | AT2G18960 |           |   |
| BnC04 | bnA4772  | 0     | BoScaffold000479_44720_309     |       |            | AT1G13600 |           |   |
| BnC04 | bnA0741  | 2     | BoC04_34927_301                | BoC04 | 34,927     | AT3G49290 |           |   |
| BnC04 | bnA3880  | 2     | BoScaffold000492_36021_301     |       |            | AT5G56780 |           |   |
| BnC04 | bnA3881  | 2     | BoScaffold000492_80177_301     |       |            | AT2G46260 | AT2G46260 | J |
| BnC04 | BRAS072  | 2.7   |                                |       |            |           |           |   |
| BnC04 | BnEMS634 | 2.7   | BoC04_28573_164                | BoC04 | 28,573     | AT2G40430 | AT2G40430 | J |
| BnC04 | BEN337   | 2.7   | BoC04_28531_179                | BoC04 | 28,531     | AT2G40430 | AT2G40430 | J |
| BnC04 | BEN266   | 2.7   | BoC04_121523_205               | BoC04 | 121,523    | AT2G40540 | AT2G40540 | J |
| BnC04 | BoGMS876 | 7     |                                |       |            |           |           |   |
| BnC04 | sS2277   | 7     | BoC04_2065086_215              | BoC04 | 2,065,086  | AT1G65590 |           |   |
| BnC04 | BGO140   | 7.3   | BoC04_2985740_184              | BoC04 | 2,985,740  | AT3G20640 |           |   |
| BnC04 | bnA5435  | 9.8   | BoC03_21757372_301             |       |            | AT3G01720 |           |   |
| BnC04 | bnA3898  | 11.4  | BoScaffold000152_P2_118199_301 |       |            | AT2G39950 | AT2G39950 | J |
| BnC04 | bnA3893  | 11.7  | BoC04_7053518_301              | BoC04 | 7,053,518  | AT2G39660 | AT2G39660 | J |
| BnC04 | bnA3896  | 12    | BoC04_7283093_289              | BoC04 | 7,283,093  | AT4G32880 |           |   |
| BnC04 | bnA3895  | 12.4  | BoC04_7107888_301              | BoC04 | 7,107,888  | AT5G36905 |           |   |
| BnC04 | bnA3885  | 13.3  | BoC04_6681467_301              | BoC04 | 6,681,467  | AT3G50730 |           |   |
| BnC04 | bnA3890  | 14    | BoC04_6765723_301              | BoC04 | 6,765,723  | AT2G39370 | AT2G39370 | J |
| BnC04 | bnA3884  | 14    | BoC04_6662671_301              | BoC04 | 6,662,671  | AT2G47040 |           |   |
| BnC04 | bnA3889  | 14.3  | BoC04_6755490_300              | BoC04 | 6,755,490  | AT2G39350 | AT2G39350 | J |
| BnC04 | bnA3886  | 14.6  | BoC04_6692801_301              | BoC04 | 6,692,801  | AT2G39220 | AT2G39220 | J |
| BnC04 | bnA3899  | 17    | BoC04_4943209_301              | BoC04 | 4,943,209  | AT2G37500 | AT2G37500 | J |
| BnC04 | bnA3901  | 18.4  | BoC04_4853652_301              | BoC04 | 4,853,652  | AT2G37370 | AT2G37370 | J |
| BnC04 | BGR83    | 19.9  | BoC04_4863957_119              | BoC04 | 4,863,957  | AT5G13740 |           |   |

|       |          |      |                              |       |            |           |           |   |
|-------|----------|------|------------------------------|-------|------------|-----------|-----------|---|
| BnC04 | bnA3902  | 21.2 | BoC04_4832311_301            | BoC04 | 4,832,311  | AT2G37280 | AT2G37280 | J |
| BnC04 | bnA3905  | 21.2 | BoC04_4687761_301            | BoC04 | 4,687,761  | AT4G32610 |           |   |
| BnC04 | bnA3903  | 22.2 | BoC04_4811011_301            | BoC04 | 4,811,011  | AT2G37260 | AT2G37260 | J |
| BnC04 | bnA3904  | 22.2 | BoC04_4788675_301            | BoC04 | 4,788,675  | AT2G37210 | AT2G37210 | J |
| BnC04 | bnA3910  | 22.2 | BoC04_4503191_230            | BoC04 | 4,503,191  | AT2G36620 | AT2G36620 | J |
| BnC04 | bnA2154  | 26   | BrA05_5043649_301            |       |            | AT2G35130 | AT2G35130 | J |
| BnC04 | bnA5967  | 30.2 | BoC04_20851795_301           | BoC04 | 20,851,795 | AT3G33004 |           |   |
| BnC04 | BGO141   | 31.8 | BoC04_20034307_263           | BoC04 | 20,034,307 | AT4G02400 |           |   |
| BnC04 | BoGMS560 | 32.6 | BoC04_34176660_276           |       |            | AT3G09160 |           |   |
| BnC04 | bnA0695  | 38   | BoScaffold000024_972317_297  |       |            | AT3G61440 |           |   |
| BnC04 | bnA0938  | 38   | BoScaffold000024_1207662_301 |       |            | AT5G23430 |           |   |
| BnC04 | BEN269   | 42.8 | BoC04_19590343_175           | BoC04 | 19,590,343 | AT3G47450 |           |   |
| BnC04 | bnA3769  | 43.7 | BoScaffold000498_71526_216   |       |            |           |           |   |
| BnC04 | bnA4214  | 48.8 | BoScaffold000637_7130_226    |       |            | AT4G02733 |           |   |
| BnC04 | bnA4000  | 63.9 | BoC01_25489245_300           |       |            |           |           |   |
| BnC04 | bnA4001  | 64.2 | BoC01_25461049_301           |       |            | AT2G25070 | AT2G25070 | I |
| BnC04 | bnA4718  | 64.2 | BoC04_29837685_301           | BoC04 | 29,837,685 | AT3G45673 |           |   |
| BnC04 | BEN239   | 66.4 | BoC04_30860617_210           | BoC04 | 30,860,617 | AT2G27860 | AT2G27860 | I |
| BnC04 | BGO041   | 66.4 | BoC04_30860620_207           | BoC04 | 30,860,620 | AT2G27860 | AT2G27860 | I |
| BnC04 | bnA4135  | 66.7 | BoC04_31011812_301           | BoC04 | 31,011,812 | AT2G28160 | AT2G28160 | I |
| BnC04 | CB10196  | 67.2 | BoC04_33057690_247           | BoC04 | 33,057,690 | AT1G43960 |           |   |
| BnC04 | bnA4022  | 69.8 | BoC04_36389682_301           | BoC04 | 36,389,682 | AT4G10570 |           |   |
| BnC04 | bnA4019  | 71.4 | BoC04_36163611_301           | BoC04 | 36,163,611 | AT4G11360 |           |   |
| BnC04 | bnA4009  | 71.7 | BoC03_20863405_301           |       |            | AT3G46460 |           |   |
| BnC04 | BEN30A   | 73.6 | BoC04_36133841_239           | BoC04 | 36,133,841 | AT2G35540 | AT2G35540 | J |
| BnC04 | bnA4032  | 77.4 | BoC04_37567682_301           | BoC04 | 37,567,682 | AT2G38060 | AT2G38060 | J |

|       |           |       |                            |       |            |           |           |   |
|-------|-----------|-------|----------------------------|-------|------------|-----------|-----------|---|
| BnC04 | bn4033    | 78.8  | BoC04_37601346_301         | BoC04 | 37,601,346 | AT5G61960 |           |   |
| BnC04 | BEN330A   | 83.2  | BoC04_39009491_117         | BoC04 | 39,009,491 | AT2G40765 |           |   |
| BnC04 | bn43654   | 90.9  | BoC04_39447484_301         | BoC04 | 39,447,484 | AT2G42760 |           |   |
| BnC04 | BEN387    | 98.4  | BoC04_39865802_148         | BoC04 | 39,865,802 | AT5G08560 |           |   |
| BnC04 | BnEMS439B | 101.9 |                            |       |            | AT5G48230 |           |   |
| BnC04 | BEN216    | 103.3 | BoC04_40450483_103         | BoC04 | 40,450,483 | AT3G05100 |           |   |
| BnC04 | bn4038    | 104.4 | BoC04_37790278_301         |       |            | AT2G38470 | AT2G38470 | J |
| BnC04 | bn45613   | 104.4 | BoC04_37966586_296         |       |            | AT2G38910 | AT2G38910 | J |
| BnC04 | O110-B01C | 104.7 | BoC04_39600479_169         | BoC04 | 39,600,479 | AT5G63440 |           |   |
| BnC04 | BEN260    | 104.7 | BoC04_38004702_204         | BoC04 | 38,004,702 | AT2G39170 | AT2G39170 | J |
| BnC04 | bn4042    | 105.9 | BoC04_38020170_301         | BoC04 | 38,020,170 | AT2G39200 | AT2G39200 | J |
| BnC04 | bn4046    | 106.4 | BoC04_38310490_301         | BoC04 | 38,310,490 | AT2G39810 | AT2G39810 | J |
| BnC04 | BEN28     | 107.2 | BoC04_38625818_244         | BoC04 | 38,625,818 | AT2G40400 | AT2G40400 | J |
| BnC04 | bn42013   | 107.5 | BoC04_39112360_301         | BoC04 | 39,112,360 | AT2G40930 | AT2G40930 | J |
| BnC04 | BEN420    | 107.8 |                            |       |            |           |           |   |
| BnC04 | Na12-E05A | 107.8 | BoC04_39335346_159         | BoC04 | 39,335,346 | AT2G41510 | AT2G41510 | J |
| BnC04 | bn43657   | 108.9 | BoC08_15576714_301         |       |            | AT2G39190 |           |   |
| BnC04 | bn45200   | 109   | BrA04_17055673_303         |       |            | AT3G47870 |           |   |
| BnC04 | bn45088   | 109.1 | BrA04_18941625_301         |       |            | AT4G38270 |           |   |
| BnC04 | bn43659   | 109.2 | BoC04_39408421_301         | BoC04 | 39,408,421 | AT2G41820 | AT2G41820 | J |
| BnC04 | bn4048    | 109.2 | BoC04_39634651_301         | BoC04 | 39,634,651 | AT2G43140 | AT2G43140 | J |
| BnC04 | bn42011   | 109.2 | BrA04_17309194_302         |       |            | AT5G16350 |           |   |
| BnC04 | bn4051    | 109.2 | BoC04_39944696_258         | BoC04 | 39,944,696 | AT2G43890 | AT2G43890 | J |
| BnC04 | bn4054    | 109.2 | BoC04_40220984_301         | BoC04 | 40,220,984 | AT2G44940 | AT2G44940 | J |
| BnC04 | bn45901   | 111.4 | BoScaffold000383_71931_301 |       |            | AT2G26695 |           |   |
| BnC04 | BEN313A   | 113.8 | BoC04_40800903_129         | BoC04 | 40,800,903 | AT4G16610 |           |   |

|       |           |       |                    |       |            |           |           |   |
|-------|-----------|-------|--------------------|-------|------------|-----------|-----------|---|
| BnC04 | BGO044    | 114.4 | BoC04_40264415_217 | BoC04 | 40,264,415 | AT2G45120 | AT2G45120 | J |
| BnC04 | bnA5089   | 115.4 | BrA04_18552225_301 |       |            | AT2G45420 | AT2G45420 | J |
| BnC04 | bnA2022   | 115.4 | BrA04_18552225_301 |       |            | AT2G45420 | AT2G45420 | J |
| BnC04 | bnA4050   | 115.4 | BoC04_39746095_301 | BoC04 | 39,746,095 | AT4G28110 |           |   |
| BnC04 | bnA4044   | 115.7 | BoC04_38084313_301 | BoC04 | 38,084,313 | AT3G55090 |           |   |
| BnC04 | BEN376    | 119.7 | BoC04_40441062_146 | BoC04 | 40,441,062 | AT2G45700 | AT2G45700 | J |
| BnC04 | Na12-E05B | 132.1 | BoC04_39335346_159 | BoC04 | 39,335,346 | AT2G41510 |           |   |
| BnC04 | Ol10-B01A | 132.5 | BoC04_39600479_169 | BoC04 | 39,600,479 | AT5G63440 |           |   |
| BnC04 | bnA1518   | 137.9 | BrA04_18370211_301 |       |            | AT2G44650 | AT2G44650 | J |
| BnC04 | Ol10-B01B | 138.8 | BoC04_39600479_169 | BoC04 | 39,600,479 | AT5G63440 |           |   |
| BnC04 | bnA1519   | 140.3 | BrA04_18248518_214 | BrA04 | 18,248,518 | AT2G44060 | AT2G44060 | J |
| BnC04 | bnA1522   | 141.7 | BrA04_18097253_288 | BrA04 | 18,097,253 | AT2G43430 | AT2G43430 | J |
| BnC04 | bnA1524   | 141.7 | BrA04_17922813_301 | BrA04 | 17,922,813 | AT2G43010 | AT2G43010 | J |
| BnC04 | bnA2015   | 142.6 | BrA04_17628226_85  | BrA04 | 17,628,226 | AT2G41830 | AT2G41830 | J |
| BnC04 | bnA5246   | 143   | BrA04_17577550_301 | BrA04 | 17,577,550 | AT2G41560 | AT2G41560 | J |
| BnC04 | bnA2004   | 145.3 | BrA04_16799529_301 | BrA04 | 16,799,529 | AT2G39470 | AT2G39470 | J |
| BnC04 | bnA1988   | 146.7 | BrA04_15519727_301 | BrA04 | 15,519,727 | AT2G35820 | AT2G35820 | J |
| BnC04 | bnA1987   | 147.5 | BrA04_15411549_301 | BrA04 | 15,411,549 | AT2G35600 | AT2G35600 | J |
| BnC04 | BEN30B    | 148.2 | BoC04_36133841_239 |       |            | AT2G35540 | AT2G35540 | J |
| BnC04 | bnA4017   | 149.7 | BoC04_35968371_301 |       |            | AT2G34960 | AT2G34960 | J |
| BnC04 | bnA4013   | 150.4 | BoC04_35723468_301 |       |            | AT3G24982 |           |   |
| BnC04 | bnA1975   | 151.2 | BrA04_14885528_301 | BrA04 | 14,885,528 | AT2G33480 | AT2G33480 | J |
| BnC04 | bnA1816   | 151.6 | BrA04_14899563_301 | BrA04 | 14,899,563 |           |           |   |
| BnC04 | bnA1973   | 151.6 | BrA04_14639857_301 | BrA04 | 14,639,857 | AT2G32730 | AT2G32730 | J |
| BnC04 | bnA5286   | 152.6 | BrA04_14588034_301 | BrA04 | 14,588,034 | AT2G32660 | AT2G32660 | J |
| BnC04 | bnA1964   | 153.1 | BrA04_13541330_301 | BrA04 | 13,541,330 | AT2G30362 | AT2G30362 | J |

|       |          |       |                                |       |            |           |           |   |
|-------|----------|-------|--------------------------------|-------|------------|-----------|-----------|---|
| BnC04 | bnA1965  | 153.3 | BrA04_13571365_291             | BrA04 | 13,571,365 | AT2G30440 | AT2G30440 | J |
| BnC04 | bnA5383  | 153.5 | BrA04_13490597_299             | BrA04 | 13,490,597 | AT2G30230 | AT2G30230 | J |
| BnC04 | bnA1963  | 153.7 | BrA04_13435626_298             | BrA04 | 13,435,626 | AT2G26720 |           |   |
| BnC04 | bnA1985  | 153.7 | BrA04_13293395_301             | BrA04 | 13,293,395 | AT2G29930 | AT2G29930 | J |
| BnC04 | bnA1984  | 153.7 | BoC04_32547519_302             |       |            | AT2G29580 | AT2G29580 | J |
| BnC04 | bnA1983  | 153.7 | BoC04_32509105_285             |       |            | AT2G29390 | AT2G29390 | J |
| BnC04 | BrGMS426 | 160.8 | BoC04_37779242_205             |       |            | AT2G38380 |           |   |
| BnC04 | O111-B05 | 170.8 |                                |       |            |           |           |   |
| BnC04 | BGR55    | 174.1 |                                |       |            | AT5G23050 |           |   |
| BnC04 | bnA1956  | 175.8 | BrA04_12982228_301             | BrA04 | 12,982,228 | AT3G57620 |           |   |
| BnC04 | bnA5039  | 176.4 | BrA04_12759591_267             | BrA04 | 12,759,591 | AT2G28507 |           |   |
| BnC04 | bnA1958  | 176.4 | BrA04_12775106_301             | BrA04 | 12,775,106 | AT5G07572 |           |   |
| BnC04 | bnA4796  | 180.2 | BoScaffold000008_P1_233001_301 |       |            | AT4G14920 |           |   |
| BnC04 | bnA5542  | 180.5 | BrA03_24870135_301             |       |            | AT2G15700 |           |   |
| BnC04 | bnA1433  | 180.5 | BrA03_24869598_301             |       |            | AT4G05133 |           |   |
| BnC04 | bnA1923  | 180.8 | BrA04_10941413_232             |       |            | AT4G15680 |           |   |
| BnC04 | bnA5959  | 181.1 | BoScaffold000008_P1_232056_301 |       |            | AT1G31630 |           |   |
| BnC04 | BnEMS843 | 183.9 | BoC04_30578742_303             |       |            | AT2G27290 | AT2G27290 | I |
| BnC04 | bnA1930  | 184.6 | BrA04_12051217_211             | BrA04 | 12,051,217 | AT5G28295 |           |   |
| BnC04 | bnA5915  | 184.9 | BrA04_11901963_301             | BrA04 | 11,901,963 | AT3G22190 |           |   |
| BnC04 | bnA1929  | 184.9 | BrA04_11857893_301             | BrA04 | 11,857,893 | AT2G26980 | AT2G26980 | I |
| BnC04 | bnA5601  | 185.2 | BrA04_11641375_301             | BrA04 | 11,641,375 | AT1G65630 |           |   |
| BnC04 | bnA1927  | 185.8 | BrA04_11512229_301             | BrA04 | 11,512,229 | AT2G25660 | AT2G25660 | I |
| BnC04 | bnA1925  | 185.8 | BrA04_11436981_301             | BrA04 | 11,436,981 | AT5G43030 |           |   |
| BnC04 | BGO078   | 187.3 |                                |       |            | AT2G24070 | AT2G24070 | I |
| BnC04 | sN2025   | 188.7 |                                |       |            | AT2G12960 |           |   |

|       |          |       |                              |       |            |           |           |   |
|-------|----------|-------|------------------------------|-------|------------|-----------|-----------|---|
| BnC04 | bn1913   | 193   | BrA04_9930221_301            | BrA04 | 9,930,221  | AT2G22740 | AT2G22740 | I |
| BnC04 | bn15598  | 193   | BrA04_9866051_301            | BrA04 | 9,866,051  | AT4G09875 |           |   |
| BnC04 | bn10006  | 193   | BrA04_7342568_290            |       |            | AT2G22540 | AT2G22540 | I |
| BnC04 | bn1912   | 193.4 | BrA04_9866051_301            | BrA04 | 9,866,051  | AT4G09875 |           |   |
| BnC04 | bn10161  | 193.8 | BoScaffold000053_1407745_301 |       |            | AT2G22540 | AT2G22540 | I |
| BnC04 | bn10128  | 193.8 | BrA04_9829689_301            | BrA04 | 9,829,689  | AT2G22540 | AT2G22540 | I |
| BnC04 | bn15199  | 194.3 | BrA04_9543819_301            | BrA04 | 9,543,819  | AT3G23085 |           |   |
| BnC04 | bn1906   | 195.1 | BoScaffold000301_484897_216  |       |            | AT4G02480 |           |   |
| BnC04 | bn1905   | 195.1 | BrA04_8788332_264            | BrA04 | 8,788,332  | AT3G18165 |           |   |
| BnC04 | bn1910   | 196.7 | BrA04_9531877_301            | BrA04 | 9,531,877  | AT2G22125 | AT2G22125 | I |
| BnC04 | BEN229   | 197.5 | BoC04_29308814_232           |       |            | AT2G21230 | AT2G21230 | I |
| BnC04 | BEN95    | 198.3 |                              |       |            | AT4G07960 |           |   |
| BnC04 | BGR71B   | 199.7 |                              |       |            |           |           |   |
| BnC04 | bn1903   | 200.2 | BrA04_8431313_305            | BrA04 | 8,431,313  | AT5G41612 |           |   |
| BnC05 | BGR49    | 0     | BoC05_27137863_144           |       |            | AT5G11800 |           |   |
| BnC05 | bn10559  | 1.3   | BoC05_26882248_301           |       |            | AT3G17040 |           |   |
| BnC05 | bn13300  | 1.3   | BoScaffold000237_761486_300  |       |            | AT4G08092 |           |   |
| BnC05 | bn14794  | 4.9   | BoC04_13352367_301           |       |            | AT5G35643 |           |   |
| BnC05 | bn10448  | 6.5   | BoScaffold000450_12080_301   |       |            | AT3G51380 |           |   |
| BnC05 | BnGMS208 | 7.4   |                              |       |            |           |           |   |
| BnC05 | BnGMS198 | 7.4   |                              |       |            |           |           |   |
| BnC05 | sS2131   | 8.3   | BoC05_8854465_174            | BoC05 | 8,854,465  | AT1G78560 |           |   |
| BnC05 | BoGMS319 | 16.6  | BoC05_7007360_227            | BoC05 | 7,007,360  | AT1G62870 |           |   |
| BnC05 | bn14117  | 19.7  | BoC05_13932622_288           | BoC05 | 13,932,622 | AT3G18130 |           |   |
| BnC05 | bn14125  | 20.2  | BoC05_29708580_318           |       |            | AT2G07210 |           |   |
| BnC05 | bn14124  | 20.2  | BoC05_15224000_302           | BoC05 | 15,224,000 | AT1G19835 | AT1G19835 | A |

|       |          |      |                               |       |            |           |           |   |
|-------|----------|------|-------------------------------|-------|------------|-----------|-----------|---|
| BnC05 | bn4127   | 20.2 | BoC05_15339888_301            | BoC05 | 15,339,888 | AT1G19840 | AT1G19840 | A |
| BnC05 | bn4288   | 22.1 | BoC05_16496431_301            | BoC05 | 16,496,431 | AT3G29180 |           |   |
| BnC05 | bn4289   | 22.1 | BoC05_16473116_245            | BoC05 | 16,473,116 | AT5G01250 |           |   |
| BnC05 | bn40194  | 22.4 | BoC09_19095369_301            |       |            | AT2G11800 |           |   |
| BnC05 | Na12-C01 | 23.2 | BoC05_16975819_85             | BoC05 | 16,975,819 |           |           |   |
| BnC05 | bn4065   | 28.1 | BoScaffold000333_229916_301   |       |            | AT4G00020 |           |   |
| BnC05 | bn4072   | 28.4 | BoC05_25517337_305            | BoC05 | 25,517,337 | AT1G10640 | AT1G10640 | A |
| BnC05 | bn4073   | 28.7 | BoC05_25556828_227            | BoC05 | 25,556,828 | AT5G51470 |           |   |
| BnC05 | bn4075   | 29   | BoC05_25710318_302            | BoC05 | 25,710,318 | AT1G10417 | AT1G10417 | A |
| BnC05 | bn4076   | 29.6 | BoC05_25894318_301            | BoC05 | 25,894,318 | AT5G09320 |           |   |
| BnC05 | bn4079   | 29.6 | BoC05_26000822_301            | BoC05 | 26,000,822 | AT1G09900 | AT1G09900 | A |
| BnC05 | bn43414  | 29.6 | BoC02_10603202_301            |       |            | AT3G26670 |           |   |
| BnC05 | bn4078   | 29.6 | BoC05_25948119_305            | BoC05 | 25,948,119 | AT1G59560 |           |   |
| BnC05 | bn4080   | 30.1 | BoC05_26021073_301            | BoC05 | 26,021,073 | AT1G09860 | AT1G09860 | A |
| BnC05 | BEN81    | 32   | BoC05_25942418_171            | BoC05 | 25,942,418 | AT4G32900 |           |   |
| BnC05 | bn4082   | 35.7 | BoC05_3205578_301             | BoC05 | 3,205,578  | AT1G08750 | AT1G08750 | A |
| BnC05 | BGO151   | 37.9 | BoC05_3149393_257             | BoC05 | 3,149,393  | AT1G08650 | AT1G08650 | A |
| BnC05 | BEN363   | 37.9 | BoC05_3150464_236             | BoC05 | 3,150,464  | AT1G08650 | AT1G08650 | A |
| BnC05 | bn4083   | 39.3 | BoC05_3151125_301             | BoC05 | 3,151,125  | AT1G08650 | AT1G08650 | A |
| BnC05 | bn4084   | 41   | BoC05_2997517_301             | BoC05 | 2,997,517  | AT1G08260 | AT1G08260 | A |
| BnC05 | bn4085   | 42   | BoScaffold000087_P1_63592_301 |       |            | AT2G43710 |           |   |
| BnC05 | bn4090   | 46.5 | BoC05_2553972_301             | BoC05 | 2,553,972  | AT4G18880 |           |   |
| BnC05 | bn4089   | 46.5 | BoC05_2576267_301             | BoC05 | 2,576,267  |           |           |   |
| BnC05 | bn4093   | 47.2 | BoC05_2440345_300             | BoC05 | 2,440,345  | AT1G07110 | AT1G07110 | A |
| BnC05 | bn4094   | 47.2 | BoC05_2416377_281             | BoC05 | 2,416,377  | AT2G39435 |           |   |
| BnC05 | sORH13A  | 49   |                               |       |            |           |           |   |

|       |           |       |                             |       |           |           |           |
|-------|-----------|-------|-----------------------------|-------|-----------|-----------|-----------|
| BnC05 | bn4056    | 55.3  | BoC05_395352_301            | BoC05 | 395,352   | AT5G48670 |           |
| BnC05 | bn4057    | 55.3  | BoC05_283542_301            | BoC05 | 283,542   | AT1G01180 | AT1G01180 |
| BnC05 | BEN140    | 86.8  |                             |       |           |           |           |
| BnC05 | bn40623   | 87.6  | BoC09_9601331_299           |       |           | AT3G54910 | AT3G54910 |
| BnC05 | BoGMS1561 | 88.1  |                             |       |           |           |           |
| BnC05 | FITO114   | 92.1  |                             |       |           |           |           |
| BnC05 | bn43301   | 92.4  | BoScaffold000249_566822_301 |       |           | AT5G07322 |           |
| BnC05 | bn4610    | 95.8  | BoScaffold000364_152113_301 |       |           | AT5G60660 | AT5G60660 |
| BnC05 | BEN285    | 117.4 |                             |       |           | AT4G33320 |           |
| BnC05 | BrGMS387  | 119.7 |                             |       |           |           |           |
| BnC05 | bn42197   | 121.3 | BrA05_1492477_301           | BrA05 | 1,492,477 | AT4G09190 |           |
| BnC05 | bn42192   | 122.1 | BrA05_2109698_321           | BrA05 | 2,109,698 | AT2G44560 |           |
| BnC05 | bn40023   | 124   | BrA05_2534365_297           | BrA05 | 2,534,365 | AT5G57510 | AT5G57510 |
| BnC05 | bn42182   | 124   | BrA05_2604626_246           | BrA05 | 2,604,626 | AT2G45910 | AT2G45910 |
| BnC05 | bn45640   | 124.6 | BrA05_2402280_301           | BrA05 | 2,402,280 | AT2G45340 | AT2G45340 |
| BnC05 | bn42187   | 124.6 | BrA05_2287965_301           | BrA05 | 2,287,965 | AT2G45010 | AT2G45010 |
| BnC05 | bn42181   | 125.9 | BrA05_2718163_301           | BrA05 | 2,718,163 | AT3G26460 |           |
| BnC05 | bn40371   | 125.9 | BrA05_2752010_301           | BrA05 | 2,752,010 | AT2G40230 | AT2G40230 |
| BnC05 | bn42179   | 128.8 | BrA05_3043046_300           | BrA05 | 3,043,046 | AT2G39670 | AT2G39670 |
| BnC05 | bn42178   | 129.7 | BrA05_3135216_162           | BrA05 | 3,135,216 |           |           |
| BnC05 | bn45639   | 130   | BrA05_3324028_301           | BrA05 | 3,324,028 | AT2G38800 | AT2G38800 |
| BnC05 | bn42174   | 130   | BrA05_3550306_265           | BrA05 | 3,550,306 | AT4G38070 |           |
| BnC05 | bn42173   | 130   | BrA05_3610261_301           | BrA05 | 3,610,261 | AT2G38170 | AT2G38170 |
| BnC05 | bn45453   | 130   | BrA05_3615531_301           | BrA05 | 3,615,531 | AT2G38150 | AT2G38150 |
| BnC05 | bn45205   | 130.3 | BrA05_3782985_299           | BrA05 | 3,782,985 | AT2G46370 |           |
| BnC05 | BnEMS1036 | 131.9 |                             |       |           | AT5G25070 |           |

A

W

W

W

J

J

J

J

J

J

J

J



|       |           |       |                          |       |            |           |           |   |
|-------|-----------|-------|--------------------------|-------|------------|-----------|-----------|---|
| BnC05 | BEN211    | 133.8 |                          |       |            | AT2G34980 | AT2G34980 | J |
| BnC05 | BRAS063   | 135.7 |                          |       |            | AT5G19550 | AT5G19550 | R |
| BnC05 | BrGMS351  | 136   |                          |       |            | AT5G19550 | AT5G19550 | R |
| BnC05 | BrGMS124  | 142.9 | BoC05_19788361_158       |       |            | AT2G21630 |           |   |
| BnC05 | BGR51     | 142.9 |                          |       |            | AT1G76780 | AT1G76780 | E |
| BnC05 | BnEMS1072 | 143.4 |                          |       |            | AT1G74450 | AT1G74450 | E |
| BnC05 | Na12-E01  | 143.4 |                          |       |            |           |           |   |
| BnC05 | bnA2120   | 144.5 | BrA05_9646616_251        | BrA05 | 9,646,616  | AT1G67550 | AT1G67550 | E |
| BnC05 | bnA2069   | 145   | BoC05_8041058_241        |       |            | AT3G26560 | AT3G26560 | L |
| BnC05 | bnA1165   | 145.3 | BoC09_24054236_321       |       |            | AT2G14790 |           |   |
| BnC05 | bnA5130   | 145.3 | BrA05_11714048_301       | BrA05 | 11,714,048 | AT3G30110 | AT3G30110 | L |
| BnC05 | bnA5870   | 145.6 | BrA05_12033088_301       | BrA05 | 12,033,088 | AT3G32093 | AT3G32093 | L |
| BnC05 | bnA2091   | 145.6 | BrA05_15013435_301       |       |            | AT3G42886 | AT3G42886 | L |
| BnC05 | bnA5625   | 145.6 | BrA05_15086181_301       |       |            | AT3G31720 | AT3G31720 | L |
| BnC05 | bnA2138   | 146.9 | BrA05_7855910_301        |       |            | AT2G29510 |           |   |
| BnC05 | bnA5629   | 146.9 | BrA05_9900847_301        |       |            | AT3G44630 | AT3G44630 | L |
| BnC05 | bnA2122   | 146.9 | BrA01_11993737_299       |       |            | AT1G04150 | AT1G04150 | A |
| BnC05 | bnA2075   | 148   | BrA05_14029064_301       |       |            | AT1G12330 | AT1G12330 | A |
| BnC05 | bnA2066   | 148.1 | BrA05_15356777_304       |       |            | AT3G53480 |           |   |
| BnC05 | bnA2060   | 148.2 | BrScaffold004022_427_301 |       |            |           |           |   |
| BnC05 | bnA5620   | 148.2 | BrA05_13538777_301       | BrA05 | 13,538,777 |           |           |   |
| BnC05 | bnA2113   | 148.3 | BrA05_12011855_301       | BrA05 | 12,011,855 | AT1G12870 | AT1G12870 | A |
| BnC05 | bnA2076   | 148.4 | BrA05_14040757_301       | BrA05 | 14,040,757 | AT1G34130 | AT1G34130 | B |
| BnC05 | BGR50     | 149.8 | BoC05_13100763_143       |       |            | AT1G32500 | AT1G32500 | B |
| BnC05 | Na10-E02A | 149.8 |                          |       |            | AT3G54090 |           |   |
| BnC05 | bnA2085   | 150.9 | BrA05_14595356_301       | BrA05 | 14,595,356 | AT1G31930 | AT1G31930 | B |

|       |         |       |                            |       |            |           |           |   |
|-------|---------|-------|----------------------------|-------|------------|-----------|-----------|---|
| BnC05 | bna2087 | 150.9 | BrA05_14742565_301         | BrA05 | 14,742,565 | AT1G31772 | AT1G31772 | B |
| BnC05 | bna1120 | 150.9 | BrScaffold000280_11257_302 |       |            | AT3G17480 | AT3G17480 | F |
| BnC05 | bna2118 | 151.4 | BrA05_10292928_301         |       |            | AT3G17250 | AT3G17250 | F |
| BnC05 | bna0354 | 151.9 | BrA05_12838818_301         | BrA05 | 12,838,818 | AT3G10730 | AT3G10730 | F |
| BnC05 | bna2061 | 151.9 | BrA05_13227028_301         |       |            | AT1G38131 | AT1G38131 | C |
| BnC05 | bna2083 | 151.9 | BrA05_14444029_301         |       |            | AT1G46840 | AT1G46840 | C |
| BnC05 | bna2114 | 151.9 | BrA05_11984544_301         | BrA05 | 11,984,544 | AT1G49340 | AT1G49340 | C |
| BnC05 | bna2115 | 152.7 | BrA05_11980424_301         | BrA05 | 11,980,424 | AT1G49340 | AT1G49340 | C |
| BnC05 | bna2116 | 152.7 | BrA05_11945153_301         | BrA05 | 11,945,153 | AT1G49480 | AT1G49480 | C |
| BnC05 | bna2133 | 153.2 | BrA05_11840091_301         | BrA05 | 11,840,091 | AT1G50460 | AT1G50460 | C |
| BnC05 | bna2751 | 153.2 | BrA08_1336839_301          |       |            | AT4G36791 | AT4G36791 | U |
| BnC05 | bna0342 | 154.2 | BrA05_13301566_206         | BrA05 | 13,301,566 | AT4G24230 | AT4G24230 | U |
| BnC05 | bna5012 | 154.2 | BrA05_14740842_277         | BrA05 | 14,740,842 | AT4G18940 | AT4G18940 | U |
| BnC05 | bna2111 | 154.2 | BrA05_12052721_301         | BrA05 | 12,052,721 | AT4G10115 |           |   |
| BnC05 | bna2105 | 154.2 | BrA05_12426734_301         | BrA05 | 12,426,734 |           |           |   |
| BnC05 | bna0252 | 154.2 | BrA02_22725096_301         |       |            | AT5G43810 |           |   |
| BnC05 | bna0253 | 154.2 | BrScaffold000201_41824_301 |       |            | AT5G66840 |           |   |
| BnC05 | bna2101 | 154.2 | BrA05_12888421_299         | BrA05 | 12,888,421 | AT5G12085 | AT5G12085 | R |
| BnC05 | bna2071 | 154.2 | BrA05_13880226_296         | BrA05 | 13,880,226 | AT5G16100 | AT5G16100 | R |
| BnC05 | bna2131 | 154.6 | BrA05_11718716_303         |       |            | AT5G26890 | AT5G26890 | Q |
| BnC05 | bna2077 | 155.1 | BrA05_14155289_301         | BrA05 | 14,155,289 | AT5G28810 | AT5G28810 | Q |
| BnC05 | bna5292 | 156.1 | BrA05_12930401_301         |       |            | AT5G28916 | AT5G28916 | Q |
| BnC05 | bna2104 | 156.6 | BrA05_12457820_301         |       |            | AT5G32513 | AT5G32513 | Q |
| BnC05 | bna2082 | 156.6 | BrA05_14435311_301         | BrA05 | 14,435,311 | AT5G35356 | AT5G35356 | S |
| BnC05 | bna2056 | 157   | BrA05_16844353_301         | BrA05 | 16,844,353 | AT5G35413 | AT5G35413 | S |
| BnC05 | bna2107 | 157.6 | BrA05_12307753_301         |       |            | AT5G36275 | AT5G36275 | S |

|       |          |       |                             |       |            |           |           |   |
|-------|----------|-------|-----------------------------|-------|------------|-----------|-----------|---|
| BnC05 | bna0668  | 159.2 | BoC03_9427817_301           |       |            | AT2G11630 |           |   |
| BnC05 | bna2128  | 161.9 | BrA05_11607194_301          |       |            | AT1G50840 |           |   |
| BnC05 | bna2124  | 162.2 | BrA05_11106780_301          |       |            | AT5G38580 | AT5G38580 | S |
| BnC05 | bna2057  | 163.1 | BrA05_16835720_305          | BrA05 | 16,835,720 | AT3G22415 | AT3G22415 | F |
| BnC05 | bna2375  | 164   | BrA05_17832691_301          | BrA05 | 17,832,691 | AT2G06910 |           |   |
| BnC05 | bna4801  | 164.4 | BrA05_17757971_229          | BrA05 | 17,757,971 | AT3G19508 | AT3G19508 | F |
| BnC05 | bna5017  | 165.1 | BrA05_17913610_301          | BrA05 | 17,913,610 | AT3G19260 | AT3G19260 | F |
| BnC05 | bna4729  | 165.8 | BoScaffold000509_10901_301  |       |            | AT3G25750 |           |   |
| BnC05 | bna5619  | 165.8 | BrA05_18458288_258          | BrA05 | 18,458,288 | AT3G18370 | AT3G18370 | F |
| BnC05 | bna2049  | 166.4 | BrA05_18654178_301          | BrA05 | 18,654,178 | AT3G18140 | AT3G18140 | F |
| BnC05 | bna4798  | 166.4 | BoC05_23892687_300          |       |            | AT3G18090 | AT3G18090 | F |
| BnC05 | bna2866  | 166.4 | BrA09_6357318_261           |       |            | AT1G60890 |           |   |
| BnC05 | BGR88B   | 168.6 |                             |       |            |           |           |   |
| BnC05 | bna0769  | 170   | BoC05_23817122_301          |       |            | AT1G60180 |           |   |
| BnC05 | bna2048  | 170   | BrA05_18778891_301          | BrA05 | 18,778,891 | AT5G25475 |           |   |
| BnC05 | bna1162  | 170.6 | BoScaffold000106_777496_318 |       |            | AT3G29260 |           |   |
| BnC05 | bna2045  | 172.4 | BrA05_21047756_279          | BrA05 | 21,047,756 | AT3G13160 | AT3G13160 | F |
| BnC05 | bna5617  | 173   | BrA05_21102199_301          | BrA05 | 21,102,199 | AT3G12980 | AT3G12980 | F |
| BnC05 | bna2043  | 173   | BrA05_21481144_301          | BrA05 | 21,481,144 | AT3G11910 | AT3G11910 | F |
| BnC05 | bna2042  | 173.8 | BrA05_21631356_301          | BrA05 | 21,631,356 | AT3G11550 | AT3G11550 | F |
| BnC05 | bna2044  | 174.3 | BrA05_21107331_301          | BrA05 | 21,107,331 | AT1G34300 | AT1G34300 | B |
| BnC05 | bna5011  | 175.4 | BrA05_21646834_301          | BrA05 | 21,646,834 | AT1G51840 |           |   |
| BnC05 | BGR70    | 175.4 |                             |       |            | AT1G26680 | AT1G26680 | B |
| BnC05 | bna0554  | 186.9 | BoScaffold000091_219034_231 |       |            | AT5G55940 |           |   |
| BnC06 | BoGMS204 | 0     | BoC07_1194234_388           |       |            | AT2G14843 |           |   |
| BnC06 | BEN374B  | 8.4   | BoC07_1042174_213           |       |            | AT1G77840 | AT1G77840 | E |

|       |           |      |                    |       |            |           |           |   |
|-------|-----------|------|--------------------|-------|------------|-----------|-----------|---|
| BnC06 | bnA5460   | 21.2 | BoC07_3687528_301  |       |            | AT1G73400 | AT1G73400 | E |
| BnC06 | bnA2572   | 21.2 | BoC07_3687528_301  |       |            | AT1G73400 | AT1G73400 | E |
| BnC06 | bnA2568   | 21.7 | BrA07_19154025_301 |       |            | AT1G71210 | AT1G71210 | E |
| BnC06 | BEN335    | 27.6 | BoC07_30944062_119 |       |            | AT1G79160 |           |   |
| BnC06 | bnA5689   | 27.6 | BrA07_21961835_303 | BrA07 | 21,961,835 | AT1G78590 | AT1G78590 | E |
| BnC06 | bnA2589   | 27.6 | BrA07_22034312_301 | BrA07 | 22,034,312 | AT1G78882 | AT1G78882 | E |
| BnC06 | bnA2592   | 27.6 | BrA07_22193291_301 | BrA07 | 22,193,291 | AT1G79280 | AT1G79280 | E |
| BnC06 | bnA2593   | 27.6 | BoC07_302532_301   | BoC07 | 302,532    | AT1G79320 | AT1G79320 | E |
| BnC06 | bnA2587   | 27.9 | BoC07_771518_295   | BoC07 | 771,518    | AT1G78290 | AT1G78290 | E |
| BnC06 | BnEMS994  | 30.7 | BoC07_1198475_240  | BoC07 | 1,198,475  | AT1G21610 |           |   |
| BnC06 | BEN374A   | 32.6 | BoC07_1042174_213  | BoC07 | 1,042,174  | AT1G77840 | AT1G77840 | E |
| BnC06 | bnA2577   | 33.5 | BrA07_20501932_294 |       |            | AT1G75280 | AT1G75280 | E |
| BnC06 | bnA1012   | 33.5 | BoC07_2451947_301  | BoC07 | 2,451,947  | AT1G75080 | AT1G75080 | E |
| BnC06 | BnEMS82B  | 34.4 | BoC07_2965046_191  | BoC07 | 2,965,046  | AT1G74970 | AT1G74970 | E |
| BnC06 | bnA4145   | 35.7 | BoC07_3320152_301  | BoC07 | 3,320,152  | AT1G74110 | AT1G74110 | E |
| BnC06 | bnA4144   | 35.7 | BoC07_3469180_301  | BoC07 | 3,469,180  | AT2G10555 |           |   |
| BnC06 | BnEMS1124 | 36.5 | BoC07_3642978_334  | BoC07 | 3,642,978  | AT1G73540 | AT1G73540 | E |
| BnC06 | bnA2570   | 37   | BrA07_19430864_301 |       |            | AT1G71940 | AT1G71940 | E |
| BnC06 | bnA5863   | 37.1 | BoC01_10128342_270 |       |            | AT5G53530 |           |   |
| BnC06 | BEN16     | 37.2 | BoC07_4905589_121  | BoC07 | 4,905,589  | AT1G70470 | AT1G70470 | E |
| BnC06 | bnA5410   | 37.5 | BoC01_25355578_299 |       |            | AT5G22930 |           |   |
| BnC06 | bnA4115   | 37.8 | BoC07_4914531_301  | BoC07 | 4,914,531  | AT1G70430 | AT1G70430 | E |
| BnC06 | bnA4793   | 37.8 | BoC07_7504465_225  | BoC07 | 7,504,465  | AT5G08390 |           |   |
| BnC06 | BGO055    | 38.1 | BoC07_7490142_210  | BoC07 | 7,490,142  | AT1G69480 | AT1G69480 | E |
| BnC06 | bnA4106   | 38.4 | BoC07_7558675_301  | BoC07 | 7,558,675  | AT1G69320 | AT1G69320 | E |
| BnC06 | bnA5135   | 42.1 | BrA07_18992968_301 |       |            | AT2G27610 |           |   |

|       |           |      |                             |       |            |           |           |   |
|-------|-----------|------|-----------------------------|-------|------------|-----------|-----------|---|
| BnC06 | bna4116   | 44   | BoC07_4899883_227           |       |            | AT4G02235 |           |   |
| BnC06 | bna4141   | 44.8 | BoC07_3712871_301           |       |            | AT1G03800 |           |   |
| BnC06 | bna0395   | 45.3 | BrA07_21174257_235          |       |            | AT5G16060 |           |   |
| BnC06 | bna2747   | 45.3 | BoC01_25355779_301          |       |            | AT4G10690 |           |   |
| BnC06 | bna0104   | 46   | BoC07_7706128_301           | BoC07 | 7,706,128  | AT1G69120 | AT1G69120 | E |
| BnC06 | bna4901   | 46.4 | BoC07_7711919_297           | BoC07 | 7,711,919  | AT2G28560 |           |   |
| BnC06 | BEN327    | 46.9 | BoC07_8457556_255           | BoC07 | 8,457,556  | AT1G68330 | AT1G68330 | E |
| BnC06 | BEN271    | 46.9 | BoC07_7556363_123           | BoC07 | 7,556,363  | AT3G30214 | AT3G30214 | L |
| BnC06 | BEN341A   | 47.2 | BoC07_8535142_132           | BoC07 | 8,535,142  | AT5G62700 |           |   |
| BnC06 | Ap1c5pr   | 47.5 |                             |       |            |           |           |   |
| BnC06 | BGO056    | 48.6 | BoC07_7556363_123           | BoC07 | 7,556,363  | AT3G30214 | AT3G30214 | L |
| BnC06 | bna5046   | 53.5 | BrA07_17488642_228          |       |            | AT5G13190 |           |   |
| BnC06 | bna4754   | 54   | BoC07_2693719_260           |       |            | AT1G44800 |           |   |
| BnC06 | bna3900   | 54   | BoC04_4881367_301           |       |            | AT3G15350 |           |   |
| BnC06 | bna0669   | 55.9 | BoC07_8913646_301           | BoC07 | 8,913,646  | AT1G66410 | AT1G66410 | E |
| BnC06 | BEN228    | 57   | BoC07_2509216_254           |       |            | AT1G67510 | AT1G67510 | E |
| BnC06 | BoGMS1186 | 57   |                             |       |            |           |           |   |
| BnC06 | BEN341B   | 57.3 | BoC07_8535142_132           | BoC07 | 8,535,142  | AT5G62700 |           |   |
| BnC06 | bna0821   | 58.4 | BoScaffold000336_264017_301 |       |            | AT1G66880 |           |   |
| BnC06 | bna2558   | 58.4 | BrA07_17705637_301          | BrA07 | 17,705,637 | AT1G67830 | AT1G67830 | E |
| BnC06 | bna2554   | 58.4 | BrA07_17412606_301          | BrA07 | 17,412,606 | AT1G67140 | AT1G67140 | E |
| BnC06 | bna2553   | 59.5 | BrA07_17388386_301          | BrA07 | 17,388,386 | AT4G32610 |           |   |
| BnC06 | bna0114   | 61.7 | BrA07_16767833_301          | BrA07 | 16,767,833 | AT1G67420 | AT1G67420 | E |
| BnC06 | bna0175   | 62.2 | BrA07_16759938_301          | BrA07 | 16,759,938 | AT3G26940 |           |   |
| BnC06 | bna0470   | 62.2 | BoC07_9423305_301           |       |            | AT1G65060 |           |   |
| BnC06 | bna4782   | 62.7 | BrA07_16758082_301          | BrA07 | 16,758,082 | AT1G67490 | AT1G67490 | E |

|       |           |      |                    |       |            |           |           |   |
|-------|-----------|------|--------------------|-------|------------|-----------|-----------|---|
| BnC06 | bna0113   | 62.7 | BrA07_16757315_301 | BrA07 | 16,757,315 | AT1G67490 | AT1G67490 | E |
| BnC06 | bna0046   | 62.7 | BrA07_16755651_301 | BrA07 | 16,755,651 | AT1G67490 | AT1G67490 | E |
| BnC06 | bna0174   | 62.9 | BrA07_16728857_301 | BrA07 | 16,728,857 | AT1G67550 | AT1G67550 | E |
| BnC06 | bna4952   | 63.2 | BrA07_16722238_285 | BrA07 | 16,722,238 | AT5G32702 |           |   |
| BnC06 | bna0017   | 63.2 | BrA07_16701988_301 | BrA07 | 16,701,988 | AT1G67710 | AT1G67710 | E |
| BnC06 | bna0034   | 63.2 | BrA07_16695280_301 | BrA07 | 16,695,280 | AT5G24350 |           |   |
| BnC06 | bna2545   | 63.2 | BrA07_16686772_302 | BrA07 | 16,686,772 | AT4G01430 |           |   |
| BnC06 | bna2544   | 63.4 | BrA07_16677737_301 | BrA07 | 16,677,737 | AT4G06488 |           |   |
| BnC06 | bna0133   | 63.8 | BrA07_16558893_301 | BrA07 | 16,558,893 | AT1G68020 | AT1G68020 | E |
| BnC06 | bna4781   | 64.2 | BrA07_16100952_301 | BrA07 | 16,100,952 | AT5G13360 |           |   |
| BnC06 | bna0033   | 65.5 | BrA07_16100357_301 | BrA07 | 16,100,357 | AT4G25090 |           |   |
| BnC06 | bna4780   | 65.5 | BrA07_16099540_301 | BrA07 | 16,099,540 | AT3G24640 |           |   |
| BnC06 | bna0016   | 65.5 | BrA07_16095439_301 | BrA07 | 16,095,439 | AT5G24070 | AT5G24070 | Q |
| BnC06 | bna2539   | 65.5 | BrA07_16095439_301 | BrA07 | 16,095,439 | AT5G24070 | AT5G24070 | Q |
| BnC06 | bna0171   | 66.7 | BrA07_16089881_301 | BrA07 | 16,089,881 | AT5G38975 |           |   |
| BnC06 | bna0068   | 67.1 | BrA07_16070666_301 | BrA07 | 16,070,666 | AT5G24280 | AT5G24280 | Q |
| BnC06 | bna0015   | 67.5 | BrA07_16040715_301 | BrA07 | 16,040,715 | AT5G43710 |           |   |
| BnC06 | bna2538   | 67.5 | BrA07_15931600_301 | BrA07 | 15,931,600 | AT1G70610 | AT1G70610 | E |
| BnC06 | bna2528   | 67.9 | BrA07_15058904_301 | BrA07 | 15,058,904 | AT1G74720 | AT1G74720 | E |
| BnC06 | bna2525   | 67.9 | BrA07_14970124_301 | BrA07 | 14,970,124 | AT1G75200 | AT1G75200 | E |
| BnC06 | FITO035A  | 68.3 |                    |       |            |           |           |   |
| BnC06 | BnEMS82A  | 69.1 | BoC07_32508597_207 |       |            | AT1G74970 | AT1G74970 | E |
| BnC06 | BnGMS205  | 70.9 |                    |       |            |           |           |   |
| BnC06 | bna0148   | 73   | BoC07_35677613_301 | BoC07 | 35,677,613 | AT1G69120 | AT1G69120 | E |
| BnC06 | bna0009   | 73   | BoC07_35675639_301 | BoC07 | 35,675,639 | AT1G53290 |           |   |
| BnC06 | O112-E03B | 74.9 | BoC07_35576050_117 | BoC07 | 35,576,050 |           |           |   |

|       |           |       |                            |       |            |           |           |     |
|-------|-----------|-------|----------------------------|-------|------------|-----------|-----------|-----|
| BnC06 | bna4285   | 76.2  | BoC07_35504618_268         | BoC07 | 35,504,618 | AT1G69370 | AT1G69370 | E   |
| BnC06 | bna1052   | 76.8  | BoC07_34184488_301         | BoC07 | 34,184,488 | AT3G31720 |           | E   |
| BnC06 | bna0650   | 77    | BoC07_33598518_273         | BoC07 | 33,598,518 | AT1G72960 | AT1G72960 | E   |
| BnC06 | bna2529   | 77.2  | BoC07_32751398_304         | BoC07 | 32,751,398 | AT1G74490 | AT1G74490 | E   |
| BnC06 | FITO095   | 77.4  |                            |       |            |           |           |     |
| BnC06 | BEN185    | 77.4  |                            |       |            |           |           |     |
| BnC06 | BGO156A   | 77.4  | BoC07_32557010_172         | BoC07 | 32,557,010 | AT1G55610 |           |     |
| BnC06 | bna4278   | 77.4  | BoScaffold000356_98841_301 |       |            | AT5G61330 |           |     |
| BnC06 | bna1006   | 77.9  | BoC06_33759140_301         |       |            | AT2G22930 |           |     |
| BnC06 | bna4628   | 77.9  | BoC04_10754934_301         |       |            | AT3G61190 |           |     |
| BnC06 | bna0656   | 79.5  | BoC07_16839511_301         |       |            | AT3G63080 | AT3G63080 | N   |
| BnC06 | BnGMS147B | 79.5  |                            |       |            | AT3G63010 | AT3G63010 | N   |
| BnC06 | BGR99B    | 85.8  | BoC07_31854860_133         | BoC07 | 31,854,860 | AT4G19239 |           |     |
| BnC06 | bna0867   | 96.1  | BoC07_29771104_301         | BoC07 | 29,771,104 | AT3G19790 |           |     |
| BnC06 | O110-F09  | 97.5  | BoC07_28931103_119         | BoC07 | 28,931,103 | AT3G57870 | AT3G57870 | N   |
| BnC06 | bna0892   | 98.6  | BoC05_7077119_301          |       |            | AT3G44350 |           |     |
| BnC06 | bna4154   | 99.6  | BoC07_27663436_303         | BoC07 | 27,663,436 | AT3G59830 | AT3G59830 | N   |
| BnC06 | bna4157   | 99.9  | BoC07_27513541_301         | BoC07 | 27,513,541 | AT3G59510 | AT3G59510 | N   |
| BnC06 | bna4965   | 100.7 | BoC07_16180589_301         |       |            | AT3G61690 | AT3G61690 | N   |
| BnC07 | BoGMS1032 | 0     |                            |       |            |           |           |     |
| BnC07 | bna4251   | 3.7   | BoC06_2074938_285          |       |            | AT4G15590 | AT4G15590 | O/P |
| BnC07 | bna4261   | 3.7   | BoC06_2471432_305          |       |            | AT4G07330 | AT4G07330 | O/P |
| BnC07 | bna4236   | 3.7   | BoC06_15105978_301         | BoC06 | 15,105,978 | AT4G06553 | AT4G06553 | O/P |
| BnC07 | bna4162   | 3.7   | BoC06_14770118_301         | BoC06 | 14,770,118 | AT5G34881 |           |     |
| BnC07 | bna4234   | 3.7   | BoC06_15054584_301         | BoC06 | 15,054,584 | AT3G19150 |           |     |
| BnC07 | bna4726   | 3.7   | BoC06_2100997_301          |       |            | ATCG00350 |           |     |

|       |         |      |                           |       |            |           |           |   |
|-------|---------|------|---------------------------|-------|------------|-----------|-----------|---|
| BnC07 | bn4188  | 4.1  | BoC06_13579405_301        | BoC06 | 13,579,405 | AT5G05180 | AT5G05180 | R |
| BnC07 | bn4191  | 4.5  | BoScaffold000960_1800_301 |       |            | AT5G01830 | AT5G01830 | R |
| BnC07 | bn4164  | 6.8  | BoC06_14723271_301        | BoC06 | 14,723,271 | AT3G49810 |           |   |
| BnC07 | bn4252  | 7.1  | BoC06_2114909_301         |       |            | AT1G52610 |           |   |
| BnC07 | bn40721 | 7.4  | BoC03_39349623_301        |       |            | AT5G66630 |           |   |
| BnC07 | bn4232  | 8.2  | BoC06_15015127_301        | BoC06 | 15,015,127 | AT5G13225 | AT5G13225 | R |
| BnC07 | bn4167  | 8.6  | BoC06_14324578_301        | BoC06 | 14,324,578 | AT5G27590 |           |   |
| BnC07 | bn4169  | 8.6  | BoC06_14278577_301        | BoC06 | 14,278,577 |           |           |   |
| BnC07 | bn4177  | 8.6  | BoC06_14027102_301        | BoC06 | 14,027,102 | AT3G46183 |           |   |
| BnC07 | bn4186  | 8.6  | BoC06_13624868_301        | BoC06 | 13,624,868 | AT1G45616 |           |   |
| BnC07 | bn4187  | 8.7  | BoC06_13586057_301        | BoC06 | 13,586,057 | AT2G31230 |           |   |
| BnC07 | bn4903  | 8.8  | BoC06_13687812_193        | BoC06 | 13,687,812 | AT3G58010 |           |   |
| BnC07 | bn4179  | 8.9  | BoC06_13994462_301        | BoC06 | 13,994,462 | AT3G16500 |           |   |
| BnC07 | bn4172  | 9    | BoC06_14197030_301        | BoC06 | 14,197,030 | AT4G08873 |           |   |
| BnC07 | bn4180  | 10.2 | BoC06_13886682_301        | BoC06 | 13,886,682 | AT2G16595 | AT2G16595 | H |
| BnC07 | bn4176  | 10.2 | BoC06_14046580_301        | BoC06 | 14,046,580 | AT2G16405 | AT2G16405 | H |
| BnC07 | bn4165  | 10.2 | BoC06_14627525_301        | BoC06 | 14,627,525 | AT2G15970 | AT2G15970 | H |
| BnC07 | bn4724  | 11   | BrA10_3001069_301         |       |            | AT2G15860 | AT2G15860 | H |
| BnC07 | bn4227  | 11   | BoC06_14860771_301        | BoC06 | 14,860,771 | AT2G15780 | AT2G15780 | H |
| BnC07 | bn4184  | 12   | BoC06_13765187_302        | BoC06 | 13,765,187 | AT3G14800 |           |   |
| BnC07 | bn4182  | 12   | BoC02_25633759_301        |       |            | AT3G28800 |           |   |
| BnC07 | bn4183  | 12   | BoC06_13809881_301        | BoC06 | 13,809,881 | AT2G13490 |           |   |
| BnC07 | bn4902  | 12.1 | BoC06_14314918_301        | BoC06 | 14,314,918 | AT2G11983 |           |   |
| BnC07 | bn4181  | 12.2 | BoC06_13872424_301        | BoC06 | 13,872,424 | AT2G15010 | AT2G15010 | H |
| BnC07 | bn4189  | 12.2 | BoC06_13553142_301        | BoC06 | 13,553,142 | AT2G15700 | AT2G15700 | H |
| BnC07 | bn4174  | 12.2 | BoC06_14122045_301        | BoC06 | 14,122,045 | AT1G36095 |           |   |



|       |         |      |                            |       |            |           |           |   |
|-------|---------|------|----------------------------|-------|------------|-----------|-----------|---|
| BnC07 | bnA0459 | 12.5 | BoC06_12726319_301         | BoC06 | 12,726,319 | AT5G28340 |           |   |
| BnC07 | bnA3768 | 12.5 | BoC07_24416978_301         |       |            | AT2G06840 |           |   |
| BnC07 | bnA4194 | 12.5 | BoScaffold000410_19634_301 |       |            | AT2G16940 | AT2G16940 | H |
| BnC07 | bnA4293 | 12.5 | BoC06_12451594_301         | BoC06 | 12,451,594 |           |           |   |
| BnC07 | bnA3967 | 12.5 | BoC06_9908054_301          |       |            | AT3G04600 |           |   |
| BnC07 | bnA4193 | 12.5 | BoC06_13409803_301         | BoC06 | 13,409,803 | AT1G37110 |           |   |
| BnC07 | bnA4195 | 12.5 | BoScaffold000410_40826_301 |       |            | AT5G38285 |           |   |
| BnC07 | bnA4258 | 13.1 | BoC06_2366458_283          |       |            | AT5G60090 |           |   |
| BnC07 | bnA4808 | 13.1 | BoC06_15175329_301         | BoC06 | 15,175,329 | AT2G15530 | AT2G15530 | H |
| BnC07 | bnA4255 | 13.1 | BoC06_2247440_301          |       |            | AT5G37500 |           |   |
| BnC07 | bnA4907 | 13.1 | BrScaffold000239_42138_304 |       |            | AT1G48260 |           |   |
| BnC07 | bnA4238 | 13.1 | BoC06_15360330_301         | BoC06 | 15,360,330 | AT2G01220 |           |   |
| BnC07 | bnA4242 | 13.1 | BoC06_15665403_301         | BoC06 | 15,665,403 | AT1G01650 |           |   |
| BnC07 | bnA4228 | 13.1 | BoC06_14888151_301         | BoC06 | 14,888,151 | AT3G25815 |           |   |
| BnC07 | bnA4226 | 13.1 | BoC06_14828402_301         | BoC06 | 14,828,402 | AT2G25970 |           |   |
| BnC07 | bnA4229 | 13.1 | BoC06_14926384_301         | BoC06 | 14,926,384 | AT2G15730 | AT2G15730 | H |
| BnC07 | bnA4266 | 13.1 | BoC06_2778576_301          |       |            | AT2G07100 |           |   |
| BnC07 | bnA4240 | 13.1 | BoC06_15620608_301         | BoC06 | 15,620,608 | AT4G04040 |           |   |
| BnC07 | bnA4245 | 13.1 | BoC06_15739861_301         | BoC06 | 15,739,861 | AT5G54710 |           |   |
| BnC07 | bnA4235 | 13.1 | BoC06_15072864_301         | BoC06 | 15,072,864 | AT1G22490 |           |   |
| BnC07 | bnA4906 | 13.2 | BoC06_2275925_301          |       |            | AT3G22970 |           |   |
| BnC07 | bnA4725 | 13.4 | BoC06_15756688_271         | BoC06 | 15,756,688 | AT2G15220 | AT2G15220 | H |
| BnC07 | bnA4247 | 13.6 | BoC06_15801680_301         | BoC06 | 15,801,680 | AT5G02910 |           |   |
| BnC07 | bnA4248 | 13.6 | BoC06_15878853_301         | BoC06 | 15,878,853 | AT2G14692 | AT2G14692 | H |
| BnC07 | bnA4161 | 13.6 | BoC06_14804908_300         | BoC06 | 14,804,908 | AT1G06460 |           |   |
| BnC07 | bnA4263 | 13.6 | BoC06_2490783_301          |       |            | AT2G13690 | AT2G13690 | H |

|       |           |      |                           |       |            |           |           |   |
|-------|-----------|------|---------------------------|-------|------------|-----------|-----------|---|
| BnC07 | Na12-F03  | 14.1 | BoC06_2511274_275         |       |            | AT4G07730 | AT4G07730 | O |
| BnC07 | sNRH63    | 14.9 |                           |       |            |           |           |   |
| BnC07 | BRAS019   | 14.9 |                           |       |            |           |           |   |
| BnC07 | CB10297   | 15.2 | BoC06_2953737_265         |       |            | AT4G04840 | AT4G04840 | O |
| BnC07 | BN25C2    | 15.7 | BoC06_4577757_142         |       |            | AT1G02910 |           |   |
| BnC07 | sN0706    | 15.7 | BoC06_15240254_357        | BoC06 | 15,240,254 | AT3G31365 | AT3G31365 | L |
| BnC07 | CB10217   | 15.7 | BoC06_5914112_163         |       |            | AT3G57150 |           |   |
| BnC07 | Na10-C01B | 15.7 | BoC06_5650953_186         |       |            | AT5G01180 |           |   |
| BnC07 | bnA0901   | 16   | BoC06_4584719_301         |       |            | AT5G42380 |           |   |
| BnC07 | bnA4246   | 16   | BoC06_15748825_301        | BoC06 | 15,748,825 | AT5G32598 |           |   |
| BnC07 | bnA4262   | 16   |                           |       |            | AT5G04290 |           |   |
| BnC07 | bnA4254   | 16   | BoC06_2200019_301         |       |            | AT3G32230 | AT3G32230 | L |
| BnC07 | bnA1003   | 17.3 | BoC08_23087748_239        | BoC08 | 23,087,748 |           |           |   |
| BnC07 | bnA4196   | 17.3 | BoC08_23737763_301        | BoC08 | 23,737,763 | AT1G71140 |           |   |
| BnC07 | bnA0935   | 17.3 | BoC06_3403068_301         |       |            | AT3G33070 | AT3G33070 | L |
| BnC07 | bnA4202   | 17.8 | BoC08_26204631_301        | BoC08 | 26,204,631 | AT5G47870 |           |   |
| BnC07 | bnA4203   | 17.8 | BoC08_26244524_301        | BoC08 | 26,244,524 | AT3G23280 | AT3G23280 | F |
| BnC07 | bnA4201   | 17.9 | BoScaffold000719_1655_301 |       |            | AT4G14342 |           |   |
| BnC07 | bnA4200   | 18   | BoC08_26146753_247        | BoC08 | 26,146,753 | AT3G23370 | AT3G23370 | F |
| BnC07 | bnA4198   | 18.1 | BoC08_25975058_301        | BoC08 | 25,975,058 | AT3G23480 | AT3G23480 | F |
| BnC07 | bnA4199   | 18.2 | BoC08_26108471_301        | BoC08 | 26,108,471 | AT3G46130 | AT3G46130 | M |
| BnC07 | bnA0731   | 25.3 | BoC06_24097329_299        | BoC06 | 24,097,329 | AT4G18950 |           |   |
| BnC07 | bnA1041   | 30   | BoC06_28284306_301        | BoC06 | 28,284,306 | AT3G48770 | AT3G48770 | M |
| BnC07 | bnA0474   | 31.6 | BoC09_25920840_231        |       |            | AT3G61390 |           |   |
| BnC07 | bnA1055   | 34.5 | BoC06_31734439_276        | BoC06 | 31,734,439 | AT4G05360 |           |   |
| BnC07 | sR12156B  | 35.7 | BoC06_31818111_169        | BoC06 | 31,818,111 | AT5G16580 |           |   |

|       |           |      |                    |       |            |           |           |   |
|-------|-----------|------|--------------------|-------|------------|-----------|-----------|---|
| BnC07 | OI10-D03D | 37.6 |                    |       |            |           |           |   |
| BnC07 | bn4304    | 39.4 | BoC06_32533026_301 | BoC06 | 32,533,026 | AT3G26920 | AT3G26920 | L |
| BnC07 | bn4908    | 39.4 | BoC06_32566425_301 | BoC06 | 32,566,425 | AT3G27000 | AT3G27000 | L |
| BnC07 | bn4313    | 40.8 | BrA06_21862527_241 |       |            | AT3G29185 | AT3G29185 | L |
| BnC07 | bn4315    | 40.8 | BoC06_34137121_183 | BoC06 | 34,137,121 | AT3G29575 | AT3G29575 | L |
| BnC07 | bn4328    | 41.4 | BoC06_34261501_301 | BoC06 | 34,261,501 | AT4G17610 | AT4G17610 | U |
| BnC07 | BGO169    | 44   | BoC06_34086182_244 | BoC06 | 34,086,182 | AT3G09920 |           |   |
| BnC07 | BEN119    | 62.9 |                    |       |            | AT5G28910 |           |   |
| BnC07 | BEN206    | 72.4 |                    |       |            | AT4G30680 |           |   |
| BnC07 | bn4346    | 80.5 | BoC04_31242317_293 |       |            | AT2G24360 |           |   |
| BnC07 | bn4344    | 80.5 | BoC06_37800109_301 | BoC06 | 37,800,109 | AT4G03420 |           |   |
| BnC07 | bn4376    | 84   | BoC06_39464119_301 | BoC06 | 39,464,119 | AT4G35060 |           |   |
| BnC07 | bn4377    | 84   | BoC06_39441907_301 | BoC06 | 39,441,907 | AT1G30050 |           |   |
| BnC07 | bn4393    | 87.4 | BoC06_43445980_301 | BoC06 | 43,445,980 | AT5G01430 |           |   |
| BnC07 | bn4400    | 87.4 | BrA04_2943957_136  |       |            | AT3G55140 |           |   |
| BnC07 | bn4399    | 87.4 | BoC06_43166079_281 | BoC06 | 43,166,079 | AT4G08460 |           |   |
| BnC07 | bn4394    | 87.4 | BoC06_43427426_301 | BoC06 | 43,427,426 | AT4G24220 | AT4G24220 | U |
| BnC07 | bn4390    | 87.7 | BoC06_43509340_301 | BoC06 | 43,509,340 | AT4G24540 | AT4G24540 | U |
| BnC07 | bn4388    | 87.7 | BoC06_43624619_301 | BoC06 | 43,624,619 | AT2G23660 |           |   |
| BnC07 | bn4385    | 88.7 | BoC06_43770397_301 | BoC06 | 43,770,397 | AT3G25495 |           |   |
| BnC07 | bn4384    | 89.7 | BoC06_43790514_301 | BoC06 | 43,790,514 | AT4G25340 | AT4G25340 | U |
| BnC07 | BoGMS373  | 92.2 |                    |       |            |           |           |   |
| BnC07 | bn43404   | 92.8 | BoC06_44356546_277 | BoC06 | 44,356,546 | AT4G27070 | AT4G27070 | U |
| BnC07 | bn43405   | 92.8 | BoC06_44323786_278 | BoC06 | 44,323,786 | AT4G26950 |           |   |
| BnC07 | bn43403   | 92.8 | BoC06_44410862_275 | BoC06 | 44,410,862 | AT4G27320 | AT4G27320 | U |
| BnC07 | bn43402   | 93.3 | BoC06_44427102_264 | BoC06 | 44,427,102 | AT4G27400 | AT4G27400 | U |

|       |          |      |                             |       |            |           |           |   |
|-------|----------|------|-----------------------------|-------|------------|-----------|-----------|---|
| BnC07 | bna3395  | 93.7 | BoC06_44570444_256          | BoC06 | 44,570,444 | AT4G27910 | AT4G27910 | U |
| BnC08 | bna4401  | 0    | BoC08_1857108_292           |       |            | AT4G09090 | AT4G09090 | P |
| BnC08 | bna0848  | 1.5  | BoC04_1469322_301           |       |            | AT5G51340 |           |   |
| BnC08 | bna5477  | 1.5  | BoC08_1501208_309           | BoC08 | 1,501,208  | AT5G19420 |           |   |
| BnC08 | BEN69    | 5.7  | BoC08_8369969_220           | BoC08 | 8,369,969  | AT1G48380 |           |   |
| BnC08 | BoGMS38  | 8.8  |                             |       |            |           |           |   |
| BnC08 | BoGMS351 | 8.8  |                             |       |            |           |           |   |
| BnC08 | BGO178   | 8.8  | BoC08_18707834_252          |       |            | AT4G07350 | AT4G07350 | P |
| BnC08 | sS2331BA | 9.3  | BoC08_10903912_116          | BoC08 | 10,903,912 | AT5G06810 |           |   |
| BnC08 | bna3762  | 9.8  | BoC08_10999144_301          | BoC08 | 10,999,144 | AT4G37705 | AT4G37705 | U |
| BnC08 | bna3761  | 9.8  | BoC08_11122588_301          | BoC08 | 11,122,588 | AT5G28076 |           |   |
| BnC08 | BGR1B    | 11.4 | BoC08_11779145_169          | BoC08 | 11,779,145 | AT1G12790 |           |   |
| BnC08 | BEN189B  | 11.4 | BoC08_14236962_229          |       |            | AT4G34590 | AT4G34590 | U |
| BnC08 | bna4711  | 11.9 | BoC08_10837538_302          | BoC08 | 10,837,538 | AT1G72220 |           |   |
| BnC08 | bna3765  | 12.2 | BoC08_10784717_302          | BoC08 | 10,784,717 | AT2G22490 |           |   |
| BnC08 | bna3767  | 12.2 | BoC08_11203620_301          | BoC08 | 11,203,620 | AT2G20630 |           |   |
| BnC08 | bna0144  | 12.2 | BoC08_11335222_301          | BoC08 | 11,335,222 | AT5G58270 |           |   |
| BnC08 | bna0836  | 12.5 | BoC07_6327946_301           |       |            | AT5G28643 |           |   |
| BnC08 | bna3764  | 13.5 | BoC08_10796441_269          | BoC08 | 10,796,441 | AT3G46430 |           |   |
| BnC08 | bna0435  | 13.7 | BoC08_14452136_301          |       |            | AT4G16630 | AT4G16630 | U |
| BnC08 | bna3766  | 13.9 | BoC08_10732119_233          | BoC08 | 10,732,119 | AT5G49630 |           |   |
| BnC08 | bna0071  | 22.4 | BoScaffold000394_170509_304 |       |            | AT1G11910 | AT1G11910 | A |
| BnC08 | bna4403  | 22.4 | BoC08_18489803_301          | BoC08 | 18,489,803 | AT3G12780 |           |   |
| BnC08 | bna4404  | 22.4 | BoC08_18448987_301          | BoC08 | 18,448,987 | AT1G12220 | AT1G12220 | A |
| BnC08 | bna0808  | 23   | BoC08_18653316_301          | BoC08 | 18,653,316 | AT4G34730 |           |   |
| BnC08 | BnGMS161 | 37.4 |                             |       |            |           |           |   |



|       |           |       |                    |       |            |           |           |   |
|-------|-----------|-------|--------------------|-------|------------|-----------|-----------|---|
| BnC08 | bn4490    | 63.9  | BoC08_34974685_301 | BoC08 | 34,974,685 | AT3G28810 | AT3G28810 | L |
| BnC08 | bn45795   | 64.6  | BoC08_34507781_302 | BoC08 | 34,507,781 | AT3G28150 | AT3G28150 | L |
| BnC08 | bn4488    | 64.6  | BoC08_34885790_300 | BoC08 | 34,885,790 | AT1G60310 |           |   |
| BnC08 | bn4496    | 64.6  | BoC08_35193805_301 | BoC08 | 35,193,805 | AT2G22610 | AT2G22610 | I |
| BnC08 | bn4497    | 64.6  | BoC08_35216428_299 | BoC08 | 35,216,428 | AT2G22540 | AT2G22540 | I |
| BnC08 | bn4498    | 64.6  | BoC08_35252325_276 | BoC08 | 35,252,325 | AT5G44680 |           |   |
| BnC08 | bn4499    | 64.6  | BoC08_35278607_303 | BoC08 | 35,278,607 | AT2G22490 | AT2G22490 | I |
| BnC08 | BEN52     | 64.9  | BoC08_35597022_161 | BoC08 | 35,597,022 | AT2G21870 | AT2G21870 | I |
| BnC08 | BGO183    | 69.1  | BoC08_34682365_236 | BoC08 | 34,682,365 | AT5G11050 |           |   |
| BnC08 | BoGMS125  | 86    | BoC08_40929085_506 | BoC08 | 40,929,085 | AT1G03000 | AT1G03000 | A |
| BnC08 | BrGMS394  | 89.3  |                    |       |            | AT1G44000 |           |   |
| BnC08 | BrGMS375C | 90.7  |                    |       |            | AT1G05180 | AT1G05180 | A |
| BnC08 | BEN316    | 93.1  |                    |       |            |           |           |   |
| BnC08 | CB10028   | 95.4  | BoC08_39012255_177 | BoC08 | 39,012,255 | AT1G16700 | AT1G16700 | A |
| BnC08 | BnEMS860  | 96.7  | BoC08_40829449_328 | BoC08 | 40,829,449 | AT1G03470 |           |   |
| BnC08 | BoGMS1558 | 98.7  |                    |       |            |           |           |   |
| BnC08 | bn4554    | 100.2 | BoC08_38862591_301 | BoC08 | 38,862,591 | AT2G32560 | AT2G32560 | J |
| BnC08 | bn40059   | 100.2 | BoC08_38862591_301 | BoC08 | 38,862,591 | AT2G32560 | AT2G32560 | J |
| BnC08 | BEN82     | 100.9 | BoC08_37025192_150 | BoC08 | 37,025,192 | AT1G17080 | AT1G17080 | A |
| BnC08 | bn40480   | 101.3 | BoC08_36969549_301 | BoC08 | 36,969,549 | AT5G32345 |           |   |
| BnC08 | bn45692   | 101.8 | BrA09_21897067_311 |       |            |           |           |   |
| BnC08 | bn45320   | 101.8 | BoC08_38551264_301 | BoC08 | 38,551,264 | AT1G22560 |           |   |
| BnC08 | bn4551    | 102.1 | BoC08_38792031_300 | BoC08 | 38,792,031 | AT3G31300 |           |   |
| BnC08 | bn45810   | 102.4 | BoC08_38521325_301 | BoC08 | 38,521,325 | AT1G12930 | AT1G12930 | A |
| BnC08 | bn42602   | 102.4 | BrA09_21897067_311 |       |            |           |           |   |
| BnC08 | bn4543    | 102.4 | BoC08_38528116_301 | BoC08 | 38,528,116 | AT1G12890 | AT1G12890 | A |

|       |           |       |                             |       |            |           |           |   |
|-------|-----------|-------|-----------------------------|-------|------------|-----------|-----------|---|
| BnC08 | bn4544    | 102.4 | BoC08_38555469_301          | BoC08 | 38,555,469 | AT1G12740 | AT1G12740 | A |
| BnC08 | bn4547    | 102.4 | BoC08_38663751_301          | BoC08 | 38,663,751 | AT1G12360 | AT1G12360 | A |
| BnC08 | bn45179   | 102.9 | BoC08_38982814_301          | BoC08 | 38,982,814 | AT1G11650 | AT1G11650 | A |
| BnC08 | bn45813   | 103.4 | BoC08_39218901_301          | BoC08 | 39,218,901 | AT1G10750 | AT1G10750 | A |
| BnC08 | bn45558   | 103.4 | BoC08_39223830_309          | BoC08 | 39,223,830 | AT1G10740 | AT1G10740 | A |
| BnC08 | bn42785   | 104.6 | BrA09_35647627_301          |       |            | AT1G07910 | AT1G07910 | A |
| BnC08 | bn45480   | 104.6 | BoScaffold000330_47398_301  |       |            | AT1G07520 | AT1G07520 | A |
| BnC08 | bn45808   | 104.6 | BoScaffold000330_198207_301 |       |            | AT5G63195 |           |   |
| BnC08 | bn45440   | 105.1 | BoScaffold000330_49205_301  |       |            | AT1G07520 | AT1G07520 | A |
| BnC08 | bn4534    | 105.5 | BoC08_40629883_301          | BoC08 | 40,629,883 | AT3G61172 |           |   |
| BnC08 | bn4539    | 106   | BoScaffold000330_354434_231 |       |            | AT5G40150 |           |   |
| BnC08 | bn4538    | 107.3 | BoC08_40291476_301          | BoC08 | 40,291,476 | AT5G36690 |           |   |
| BnC08 | bn42783   | 107.3 | BrA09_35751967_301          |       |            | AT1G07470 | AT1G07470 | A |
| BnC08 | bn4537    | 107.4 | BoC08_40327538_301          | BoC08 | 40,327,538 | AT5G03870 |           |   |
| BnC08 | bn42782   | 107.5 | BrA09_36016899_303          |       |            | AT1G06440 | AT1G06440 | A |
| BnC08 | bn45720   | 107.6 | BrA09_36111852_301          |       |            | AT1G05950 | AT1G05950 | A |
| BnC08 | bn45807   | 107.7 | BoC08_40306294_301          | BoC08 | 40,306,294 | AT1G05360 | AT1G05360 | A |
| BnC08 | bn45806   | 107.7 | BoC08_40937947_301          | BoC08 | 40,937,947 | AT1G02990 | AT1G02990 | A |
| BnC08 | bn4531    | 107.7 | BoC08_40937947_301          | BoC08 | 40,937,947 | AT1G02990 | AT1G02990 | A |
| BnC08 | bn4527    | 109.6 | BoC08_41383351_301          | BoC08 | 41,383,351 | AT1G01950 | AT1G01950 | A |
| BnC08 | bn45428   | 109.6 | BoC08_41331400_301          | BoC08 | 41,331,400 | AT1G01770 | AT1G01770 | A |
| BnC08 | BoGMS1166 | 110.7 |                             |       |            |           |           |   |
| BnC08 | bn44795   | 115.6 | BoScaffold000330_36569_301  |       |            | AT3G44091 |           |   |
| BnC08 | bn45719   | 115.6 | BrA09_36304337_301          |       |            | AT1G04860 | AT1G04860 | A |
| BnC08 | BEN136B   | 119   | BoC08_41173283_131          | BoC08 | 41,173,283 | AT1G01090 |           |   |
| BnC08 | bn42773   | 132.4 | BrA09_36753704_301          |       |            | AT1G68080 |           |   |

|       |           |       |                    |       |            |           |           |   |
|-------|-----------|-------|--------------------|-------|------------|-----------|-----------|---|
| BnC08 | bnA5805   | 137.6 | BoC08_41421132_301 | BoC08 | 41,421,132 | AT3G42410 |           |   |
| BnC08 | bnA4526   | 140.1 | BoC08_41433239_301 | BoC08 | 41,433,239 | AT1G02080 |           |   |
| BnC08 | BEN136A   | 141.3 | BoC08_41173283_131 | BoC08 | 41,173,283 | AT1G01090 |           |   |
| BnC08 | BrGMS375A | 143.7 |                    |       |            | AT1G05180 | AT1G05180 | A |
| BnC08 | BrGMS375B | 147.1 |                    |       |            | AT1G05180 | AT1G05180 | A |
| BnC08 | bnA2772   | 151.7 | BrA09_36860095_301 | BrA09 | 36,860,095 | AT1G01070 |           |   |
| BnC08 | bnA2776   | 152.7 | BrA09_36402548_279 | BrA09 | 36,402,548 | AT5G16410 |           |   |
| BnC08 | bnA4668   | 152.7 | BrA09_36327642_302 | BrA09 | 36,327,642 | AT1G04630 |           |   |
| BnC08 | bnA2784   | 152.7 | BrA09_35707655_301 | BrA09 | 35,707,655 | AT1G07560 | AT1G07560 | A |
| BnC08 | bnA2791   | 154.8 | BrA09_35278168_284 | BrA09 | 35,278,168 | AT1G51200 |           |   |
| BnC08 | bnA5099   | 154.8 | BrA09_35278168_284 | BrA09 | 35,278,168 | AT1G51200 |           |   |
| BnC08 | bnA2790   | 155.1 | BrA09_35321451_301 | BrA09 | 35,321,451 | AT1G09530 | AT1G09530 | A |
| BnC08 | bnA2789   | 155.1 | BrA09_35389195_301 | BrA09 | 35,389,195 | AT3G14025 |           |   |
| BnC08 | bnA2796   | 158.2 | BrA09_33398631_301 | BrA09 | 33,398,631 | AT1G16445 | AT1G16445 | A |
| BnC08 | bnA5427   | 160.7 | BoC08_35949347_304 |       |            | AT2G20830 | AT2G20830 | H |
| BnC08 | bnA2799   | 160.7 | BrA09_32229790_301 | BrA09 | 32,229,790 | AT2G21120 | AT2G21120 | H |
| BnC08 | bnA5723   | 161.1 | BrA09_32177679_301 | BrA09 | 32,177,679 | AT2G21230 | AT2G21230 | I |
| BnC08 | bnA4491   | 162.5 | BoC08_34986249_301 |       |            | AT3G19770 |           |   |
| BnC08 | bnA2947   | 162.7 | BrA09_5056173_301  |       |            | AT2G22480 | AT2G22480 | I |
| BnC08 | bnA4493   | 162.9 | BoC08_35073478_301 |       |            | AT2G22770 | AT2G22770 | I |
| BnC08 | bnA2939   | 164   | BrA09_31788228_301 | BrA09 | 31,788,228 | AT1G78500 |           |   |
| BnC08 | BoGMS1382 | 165.4 |                    |       |            |           |           |   |
| BnC08 | BnEMS14   | 165.7 | BoC08_36424147_266 |       |            |           |           |   |
| BnC08 | BoGMS1308 | 166.8 |                    |       |            |           |           |   |
| BnC08 | BoGMS586  | 167.9 | BoC08_34092882_250 |       |            | AT2G25052 | AT2G25052 | I |
| BnC08 | BrGMS5    | 171.5 |                    |       |            | AT4G05490 |           |   |



|       |           |       |                    |       |            |           |           |   |
|-------|-----------|-------|--------------------|-------|------------|-----------|-----------|---|
| BnC08 | bna5724   | 172.3 | BrA09_30571654_300 | BrA09 | 30,571,654 | AT3G63030 | AT3G63030 | N |
| BnC08 | bna4521   | 172.3 | BoC08_33259513_301 |       |            | AT3G62620 | AT3G62620 | N |
| BnC09 | bna1478   | 0     | BrA02_23454785_301 |       |            | AT3G30775 |           |   |
| BnC09 | bna5851   | 4.4   | BoC09_171077_274   | BoC09 | 171,077    | AT4G14580 |           |   |
| BnC09 | BEN332C   | 6     | BoC09_186601_237   | BoC09 | 186,601    | AT4G00660 | AT4G00660 | O |
| BnC09 | BGO199B   | 10    | BoC09_193617_190   | BoC09 | 193,617    | AT4G00710 | AT4G00710 | O |
| BnC09 | BoGMS1072 | 16.9  |                    |       |            |           |           |   |
| BnC09 | BGO199A   | 20.3  | BoC09_193617_190   | BoC09 | 193,617    | AT4G00710 | AT4G00710 | O |
| BnC09 | BEN343    | 21.9  | BoC09_30393262_235 |       |            | AT3G23690 |           |   |
| BnC09 | bna5746   | 23.7  | BrA09_696711_301   |       |            | AT4G00900 | AT4G00900 | O |
| BnC09 | bna4581   | 24.9  | BoC09_2014248_302  | BoC09 | 2,014,248  | AT4G07810 | AT4G07810 | O |
| BnC09 | bna4580   | 25.7  | BoC09_2017095_301  | BoC09 | 2,017,095  | AT3G51360 |           |   |
| BnC09 | bna4579   | 26.3  | BoC09_2055747_260  | BoC09 | 2,055,747  | AT3G27860 | AT3G27860 | L |
| BnC09 | bna4577   | 26.4  | BoC09_2061471_219  | BoC09 | 2,061,471  | AT2G44790 |           |   |
| BnC09 | bna5960   | 26.5  | BoC09_2063866_301  | BoC09 | 2,063,866  | AT2G35280 |           |   |
| BnC09 | bna3638   | 27.5  | BoC09_2186157_301  | BoC09 | 2,186,157  | AT3G28580 | AT3G28580 | L |
| BnC09 | bna4708   | 28    | BoC09_2165074_301  | BoC09 | 2,165,074  | AT5G01820 |           |   |
| BnC09 | BoGMS1484 | 30.3  |                    |       |            |           |           |   |
| BnC09 | BrGMS725B | 31.4  |                    |       |            | AT5G48230 |           |   |
| BnC09 | BEN55A    | 31.9  | BoC09_2708553_177  | BoC09 | 2,708,553  | AT4G27500 |           |   |
| BnC09 | FITO135B  | 32.2  |                    |       |            |           |           |   |
| BnC09 | FITO136   | 35.2  |                    |       |            |           |           |   |
| BnC09 | bna4585   | 45.1  | BoC09_1990112_301  |       |            | AT3G27400 | AT3G27400 | L |
| BnC09 | BnEMS820B | 76.9  |                    |       |            |           |           |   |
| BnC09 | bna4594   | 78.5  | BoC09_23062819_301 |       |            | AT3G18165 |           |   |
| BnC09 | bna4592   | 79.1  | BoC09_5057885_301  | BoC09 | 5,057,885  | AT5G67050 | AT5G67050 | X |

|              |             |               |                                 |           |             |             |             |            |
|--------------|-------------|---------------|---------------------------------|-----------|-------------|-------------|-------------|------------|
| BnC09        | bna4591     | 79.1          | BoC09_5058499_301               | BoC09     | 5,058,499   | AT5G67050   | AT5G67050   | X          |
| BnC09        | bna4761     | 85.6          | BoC09_6686378_301               | BoC09     | 6,686,378   | AT1G48490   | AT1G48490   | C          |
| BnC09        | BnGMS213A   | 85.6          |                                 |           |             | AT1G67330   |             |            |
| BnC09        | BGO196      | 87.2          | BoC09_6732672_119               | BoC09     | 6,732,672   | AT2G37110   |             |            |
| BnC09        | bna0971     | 89.1          | BoC09_7208308_301               | BoC09     | 7,208,308   | AT5G45360   |             |            |
| BnC09        | bna4601     | 89.1          | BoScaffold000035_P2_283375_259  |           |             | AT5G16190   |             |            |
| BnC09        | bna4602     | 89.4          | BoScaffold000035_P2_669076_301  |           |             | AT1G54560   | AT1G54560   | C          |
| BnC09        | bna3857     | 89.7          | BoScaffold000035_P2_1472078_301 |           |             | AT4G16870   |             |            |
| BnC09        | bna1011     | 89.7          | BoC07_13141450_301              |           |             | AT1G61760   | AT1G61760   | D          |
| BnC09        | Na10-C01C   | 90            | BoC09_8400120_250               | BoC09     | 8,400,120   | AT5G25615   |             |            |
| BnC09        | BEN203      | 91.9          | BoC09_18992253_333              | BoC09     | 18,992,253  | AT5G38600   |             |            |
| BnC09        | bna0875     | 93            | BoC09_34857697_301              | BoC09     | 34,857,697  | AT1G61215   | AT1G61215   | D          |
| BnC09        | BrGMS726A   | 102.5         |                                 |           |             |             |             |            |
| <b>Total</b> | <b>2115</b> | <b>2477.4</b> | <b>1923</b>                     | <b>46</b> | <b>1309</b> | <b>1930</b> | <b>1033</b> | <b>198</b> |

<sup>a</sup> The left, middle, and right refers the chromosome or scaffold of the *B. rapa* or *B. oleracea*, the physical position of the homoeologous locus in *B. rapa* or *B. oleracea* chromosomes, and the matching base pairs of the homoeologous locus in *B. rapa* or *B. oleracea*, respectively.

<sup>b</sup> The colors of the homoeologous collinear fragments are same as to the colors of the *B. rapa* and *B. oleracea* chromosomes in Figure 2.

<sup>c</sup> The capital letters represent the conserved blocks defined by Schranz et al. (2006). The colors of the conserved blocks are same as to the colors of the conserved blocks in Figure 3.
