# Supplementary material for: A Complex Recombination Pattern in the Genome of Allotetraploid Brassica napus as Revealed by a High-Density Genetic Map
Source: PubMed Central journal article supplement (PMC4214627; doi:10.1371/journal.pone.0109910), 2014-10-30
Supplement: pone.0109910.s002.pdf [file pone.0109910.s002.pdf]

**Table S2. The primer sequences of the SSR markers used in the HJ DH population genetic linkage map construction**

| <b>Marker</b> | <b>F_primer (5'--3')</b> | <b>R_primer (5'--3')</b> |
|---------------|--------------------------|--------------------------|
| <b>BEN2</b>   | GGGCAGGGAGCTAAGTAACC     | AACAGCTCCACCGTTACTGG     |
| <b>BEN6</b>   | GTGGAAGATCGAGTGCGAAT     | CCTCTGACTCCATCTCAGCC     |
| <b>BEN9</b>   | TGGAGCAACAACCTGTGAAG     | GTGGTGAGGGAAGGAGTTGA     |
| <b>BEN10</b>  | AACAGCAGAGAAGCGAGGAG     | GAAGAGGGATCGGAAGAAGG     |
| <b>BEN14</b>  | CAAGAGATCGTAGCTTCCGC     | CAGTTGGCCAGAAGTGCATA     |
| <b>BEN16</b>  | CTGGTCCAATGAGCAAACCT     | GGAGGTGGTCCTTTCTTTCC     |
| <b>BEN25</b>  | CGTCTACTGCCCTCAATGGT     | CTAGCGAGGATTCCGATGAG     |
| <b>BEN28</b>  | TCGCAAACGTCATCACTCTC     | GCCGTCGCGTCATATATTCT     |
| <b>BEN30</b>  | GGAGAATGGTAAGCGAGAAGC    | TCCACACCTTGAAAGGGTTC     |
| <b>BEN32</b>  | GAGATGCTTCTATCGCCTGG     | CTCGTCGAGGACTCTCATCC     |
| <b>BEN43</b>  | GTGGTGATGGTACATCTGCG     | CCTTTGGTGGTAGTGGTGGT     |
| <b>BEN45</b>  | TGTTCGTATTCTCGCGACTG     | CGATTTCTTCAAGCTCTGC      |
| <b>BEN48</b>  | TGGGCTCCTACAACCGTAAC     | TCTGATCCATCTGATGCTGC     |
| <b>BEN50</b>  | TCAATCCTCGAATCTCGCTT     | CGATCCCTGGAGGATACCTT     |
| <b>BEN52</b>  | TTCAAGGATGAGGAAATGCC     | ACAGCGAAAGGGAACAAAGA     |
| <b>BEN55</b>  | ACGCCATTTGCATTCTTCTC     | TCTGTGCTTCCACAATCAGC     |
| <b>BEN59</b>  | GATTCGCTTCCCTTCTTCT      | TTGAGCTTCTCTAGCTCCGC     |
| <b>BEN68</b>  | CGTCACACGCCACATTATTC     | AGTAATCAATCACCTGCGGC     |
| <b>BEN69</b>  | AACCCTGAAGAATCCCGTCT     | GGTTGGCTACCAGTTTCAGG     |
| <b>BEN78</b>  | CTGTGGTTCCTGCTCTCTCC     | AGTGAAATTGGGTTTCGCAC     |
| <b>BEN81</b>  | GAAAGCGGCAAAGTCATTCT     | GAATCCGAAACTCCGAGACA     |
| <b>BEN82</b>  | AAGGATTTGCTGAGGAAGCA     | CAGCATGATAACCATGGACG     |
| <b>BEN83</b>  | TGATCGGTCAAAGTCAACCA     | GATCCACCGTGCTTCTCTGT     |
| <b>BEN84</b>  | TTGATCCAATAGCCATGACG     | TCGAGGACGAGATGAGACCT     |
| <b>BEN95</b>  | GAAGACGAAGATGCCGTAGC     | TGGAATTTGCTGGAGGTTTC     |
| <b>BEN98</b>  | ATCACTTCCGGTAATGCGAC     | CTGATTTGAAGGCTCTTCCG     |
| <b>BEN116</b> | ACGCTCAATCTCACAGCCTT     | ATGAAACTTTCTCGGAGGCA     |
| <b>BEN119</b> | ATGGACAGGAGATGGTGGAG     | GGTATCCACGGCTTGTGACT     |

|               |                        |                        |
|---------------|------------------------|------------------------|
| <b>BEN123</b> | AAAGACAAAGACTTGCGCGT   | CTCCCACTCAGACTTCTCGG   |
| <b>BEN133</b> | TTGGGTGGTAAGAAAGATGGA  | ACTTGCTCGTGTGGAAGACC   |
| <b>BEN134</b> | AGCTAAGCTAAAGGCGGAGG   | AAGCCCAAATCAAGCATCTG   |
| <b>BEN136</b> | TGCGAGGATCCCAAGTTTAC   | CAAACGTGTTTCCTTGTGGCA  |
| <b>BEN140</b> | ACAGGACACGATACGGGAGA   | GGCTTGCTTCAGTCCGTAAG   |
| <b>BEN178</b> | CTCGCTAGGAAACGGCATAG   | AGAGATCCAGCCTTTGTGTC   |
| <b>BEN185</b> | GGAGGAAGGGAACAGTGTGA   | TCCGGAAGTGAAGTAATCGG   |
| <b>BEN186</b> | TCTTCTTCCTCCTCAGCTCG   | TCTTCCTCTTCTCGCTCTCG   |
| <b>BEN189</b> | TTAAACCCGGTCCTGTTCTG   | CATGAGCTCAGGAGGAGGAG   |
| <b>BEN190</b> | CCGGAAGATCAGGTAACGA    | AGGAGCGCTTGTGTCAATCT   |
| <b>BEN200</b> | AAGCAAACAAACACATGCCA   | TGCGGAAGAAGAAGAAAGGA   |
| <b>BEN203</b> | TGACTCAAATCAACCTCTCACG | TTTGTCACTCGCCATCTCTG   |
| <b>BEN206</b> | CGCACGCTTTATGTTCTGTC   | CGTCTCCTGGTGGTACCTGT   |
| <b>BEN210</b> | GCAAGGCTTTCTCACCAAGT   | TGAAACAATCACGCAAAGGA   |
| <b>BEN211</b> | ACACGCTCACTGGAGAATCC   | TTTCGTCCGGTGTAGTTGTGTC |
| <b>BEN216</b> | ATTGTCTTTGCTCCGACACC   | TTGAGAAGCGGCGTAGAAAT   |
| <b>BEN228</b> | GACCAATCCTCCTCCTCCTC   | TTGAAGAGCTGAGTCGGGAT   |
| <b>BEN229</b> | TTCAAACACGGTCTCTGCAC   | GTCCAGCGATTGAAGATGGT   |
| <b>BEN235</b> | TCTCGATGGGAAAGTGGAAC   | CATGGCACTGATCCAATCAC   |
| <b>BEN236</b> | TCGGTGGAAGCTAATCTTGG   | GGGATTGATCGGAACTCGTA   |
| <b>BEN239</b> | GAAGGACTCGTCAAGATGGC   | CAGCTGGAGTACAGATCGCA   |
| <b>BEN251</b> | AAATCTGGGATCTGCACGAC   | CGTATCCCTGCTGCTTCTTC   |
| <b>BEN253</b> | ATCTTCGTGGCTGCGTGT     | GCCAACATTTCGGAAAGAGAG  |
| <b>BEN254</b> | TTCAATGGAAAGATCCCGAG   | TTGCAGAAGCGTAAAGCAGA   |
| <b>BEN260</b> | AGTCGGCTAAGGAGAAAGCC   | AACATCCACATCTCCAAGCC   |
| <b>BEN266</b> | AGGAACGGTTGCTTACGAGA   | ATCCCTCAGCTCACTCCTCA   |
| <b>BEN269</b> | GAATGGGTACACGCCTGAGT   | CCGATGTTGATGTTCTGTG    |
| <b>BEN271</b> | AGGTTCGTTGGTCGGTAGTG   | TTGTGGAACGAGAACTGCTG   |
| <b>BEN278</b> | AGCTGTGAGGGAGTCAAGGA   | TTTCGCGGTATCTACGGAAC   |
| <b>BEN281</b> | GTGGATTTCTGCTCACCCAT   | ATGTGAGGAGGGTGAAGGTG   |

|               |                       |                        |
|---------------|-----------------------|------------------------|
| <b>BEN284</b> | CAAGCGGAGAGGATGAAGAG  | GGAGCTTGACCTTGAGCAAC   |
| <b>BEN285</b> | ATCCGGGTTTGCACATAGAG  | CCAGAGGATGTTTCAGTGGGT  |
| <b>BEN288</b> | CAAACCGGTCACTAAACCGT  | GGAAGCTGAAGAAGCACGTC   |
| <b>BEN296</b> | ACGCCGTGTCAGAAGAAGAT  | AACAGGCTTTAACGAGGTGG   |
| <b>BEN312</b> | TAAACCTCCGCTTAAAGCCC  | ATCCGACTTCGAATTCCTCC   |
| <b>BEN313</b> | CGAGAGTTTGAGTGGCTGTG  | TAATTCGCCGAGAGGAAGAA   |
| <b>BEN316</b> | GCTTGCTTCTCTTGGAATC   | CCCACGGAGATAGATGGAGA   |
| <b>BEN320</b> | CGTTGGTTTTTGCATGTTGA  | GCTGCTCTCATTTTGGAAGC   |
| <b>BEN327</b> | GCAAGATTCTTCCCGTTCAA  | GCGATCTGATTAGCCCTTG    |
| <b>BEN330</b> | CCTTTCTGGGGATTTGATTG  | ATCCGCAGATTGGATCTTTG   |
| <b>BEN332</b> | CTCCGCAAGTTTCCTTTTTG  | CCGACCGAGACTGGAAATTA   |
| <b>BEN334</b> | GCGATAGGTGTTTCAGGGAGA | TTTCGCAGTCATACTCGTCG   |
| <b>BEN335</b> | ATGACTCGTGATCTCCTCGG  | AAATCGAGACGTTTCTCCA    |
| <b>BEN337</b> | TTACTGAACCAACCTCGTCG  | GGAGAGAGCGTCTTTGGTTG   |
| <b>BEN341</b> | TGGAAACATTAGCTTGAACC  | GCAACTCGTCTTGTTTCATT   |
| <b>BEN343</b> | TCTTTGGAAGATGACCCAG   | TCCAGCTTCATCATGTCTTACA |
| <b>BEN348</b> | GATTAGCTCTGGTTTCCCC   | AGAAAATCATCACCCCTCC    |
| <b>BEN349</b> | GTGTGGTCGTCAATTTGTGC  | AGGAGGAGGAAGAGCAGAGG   |
| <b>BEN363</b> | CCTTGATTCAAAGAGCAGG   | TCAGGGCGGAGTTTACAAAG   |
| <b>BEN374</b> | CTGACGAGGCGATTAAGAGG  | TCACCATCTCAGCAGTAGCG   |
| <b>BEN376</b> | ATTAGGGCTGAGTCTGGGCT  | GGAGCTTAACGATGTGGAACA  |
| <b>BEN387</b> | TGAAAGGGTCGAATTCGTTT  | ATGAGTTTCGCCTAACGACG   |
| <b>BEN391</b> | ACCACCATGCCTAAGTCGTC  | AACTAAGGTGGGGGATTTGG   |
| <b>BEN396</b> | GTAACAGCGTCTTGCGACAG  | TCCTCTGATCCACTCCATCC   |
| <b>BEN406</b> | CGGGGAGGTTTTAAAGCAG   | CACGGATTTGACACCCTCTT   |
| <b>BEN410</b> | TGTTCCCTCCACCACAACAAA | GTGCTTCTGCTTCTTTTGGC   |
| <b>BEN420</b> | GCAGCAAAGGCAGGTCTACT  | AGGATTGAAGGCGACAGAGA   |
| <b>BEN425</b> | CCGGGAGTAACTGACCTCAA  | TAGTCTCCTTACAACGCCCC   |
| <b>BGO001</b> | TTCGCTATCTCTCGACCGTT  | ATCCTCGCCGTGATATTCCT   |
| <b>BGO006</b> | AACGGCTATGGCTTGTATGG  | GACTCTTCGGTCTCGCTCAG   |

|               |                       |                       |
|---------------|-----------------------|-----------------------|
| <b>BGO029</b> | GCAACTGCACAGAGTTTGG A | ATCATCGTGATTCTCTCGC   |
| <b>BGO041</b> | GAAGGACTCGTCAAGATGGC  | CTGGAGTACAGATCGCAGCA  |
| <b>BGO044</b> | TCGCACTTGAATCTCCCTCT  | CGAGTCAACTCGGTGAGACA  |
| <b>BGO054</b> | TAAGTTCTTCGCCGAGATCC  | CAAGCGCAAACCTCAAGCATA |
| <b>BGO055</b> | CGATCACTGCTTCACTGCAT  | TAGTTAGGTGGTCGGCCAAG  |
| <b>BGO056</b> | AGGTTCGTTGGTCGGTAGTG  | TTGTGGAACGAGAACTGCTG  |
| <b>BGO078</b> | ACTTACACCTCTTGGTGGCG  | CAGCTTCTCCAAGCAGATCC  |
| <b>BGO090</b> | GAGGTGTGGCTAGTGGTGGT  | CGGTGAATGAAGTCCATCCT  |
| <b>BGO108</b> | TCGCGTGCCAAACAATAGTA  | ATTCACTTCTTCCATTGCGG  |
| <b>BGO114</b> | CCTTTATTCCATTTCCGGGT  | TGGACCAGCCAAGGTTAGTT  |
| <b>BGO120</b> | TGGCATTGAGTAGTGGCCT   | AGTGGCCCACACTTCCATAG  |
| <b>BGO125</b> | GAACCACCAAGGGAAAGTCA  | CGATTCAGCTAATCCAAGCC  |
| <b>BGO140</b> | GGACGTGCGGATCAAGATA   | TGACAACGGGATATTCAAAGG |
| <b>BGO141</b> | TTTCCAGGGATGGTTATGGA  | CCGGCTCTGATACGCATACT  |
| <b>BGO146</b> | CCTAGTCCATGCTGTTTCGG  | CCCAAGGAAGATGGTGAAGA  |
| <b>BGO151</b> | GAGATCGTCGGTGAGAGAGC  | TACAGCGGACTCCAAACCTC  |
| <b>BGO153</b> | CGACGAAAGGAAGAAACCT   | AGAAGGAAAGTAGCCGCCTC  |
| <b>BGO156</b> | TGTGTCAGCCACAAGAGAGG  | TCGCCATGATGTTATCTGGA  |
| <b>BGO160</b> | CCAGACACAACAAACATGGC  | TTCGAGGAGAGTTTGGGAGA  |
| <b>BGO161</b> | TTTGGTTACTAACACGCCCG  | AGGACTCGAAATGGATGTGC  |
| <b>BGO169</b> | CTAATCCACCACCGTCACCT  | TTGTGTTTAGAGGCGCAATG  |
| <b>BGO178</b> | ACTAACAAGCACCGGAGACG  | AGCACCTGTAGCGGGTTCTA  |
| <b>BGO179</b> | TTCTTCGCCTTACCTCCTGA  | AACACAAGTGAGACATTGGCA |
| <b>BGO183</b> | AAGAAAGGTCCATGTGTCCG  | CGAAATGCCAGATTCCAAAT  |
| <b>BGO185</b> | GATAACCGATCGGACATTCG  | AAGGCCAGTCCAACCAGAG   |
| <b>BGO196</b> | GTGAAGGGAAGTCCCAGACA  | TCGACCACAAGACCTGTTCA  |
| <b>BGO199</b> | CAATCGAATCGACATGAACG  | TGCGTTGTATTAGATGCACGA |
| <b>BGR1</b>   | TGACTTTCTTGAGGGTATGC  | AGCATTGGTATCCAAGACAA  |
| <b>BGR2</b>   | CGTACGCTTGTGTGAGTAGA  | CAGCAGGTAATAACAGAGGG  |
| <b>BGR6</b>   | GAAGAAGCTTTACTCGGTGA  | TTATGTTAGGGCTTGTCTCTG |

|              |                         |                          |
|--------------|-------------------------|--------------------------|
| <b>BGR8</b>  | ATAGTCATCGGAGGTCGATT    | AAATCCACTTTCTCTCTCCC     |
| <b>BGR16</b> | TCCGTCTCTTCTTTTCTTGA    | CGCTGTAGTGTTCTTCTGGT     |
| <b>BGR20</b> | CGTAACTTGTTGTTGTCACG    | CCTACCATTGAAGATGGTCT     |
| <b>BGR23</b> | GTCGGATCAGCTCTGTGTAT    | CTCTTCTTCTCTCTCATCGC     |
| <b>BGR34</b> | GGACCTTGGTTCAGTGTGTA    | GAGTAGGATGGGTGCATCT      |
| <b>BGR35</b> | CCGCCTAAGCTCATTAACTA    | CACCTAGTCACCGGAATAAA     |
| <b>BGR38</b> | TGCTCTTACTCCTCTGCTCT    | CCAACTCTTCTAGGATCGC      |
| <b>BGR42</b> | AGTCGCTAGAGGTTTTTCT     | CAGCACTAAGCATCTCATCA     |
| <b>BGR43</b> | GTGCTCCTTTCAAATCTACG    | GACAGGATGATGTGGTATCC     |
| <b>BGR45</b> | ATCGTTTCTCTCTCCCTCTC    | ATATCCGTTGGAGAAGACG      |
| <b>BGR49</b> | GATATTGGTCGTTGGAGTTC    | CCTCTCTCGCCATTACTCTA     |
| <b>BGR50</b> | GATGGCCATGGAGTAGATAA    | GACCCATTTCGTACTIONTGGATT |
| <b>BGR51</b> | GAAGGGATAGAGAGAGAGGC    | GGAAGAGAAGAACAGAAGCA     |
| <b>BGR52</b> | CAGAATCGGAGTAACCAACT    | AAAATCACCGATCCTCTTCT     |
| <b>BGR54</b> | CTTCCCTTCTTCAGTTGCT     | GGTTTGAGAAATGATTCACG     |
| <b>BGR55</b> | AGACGAAAAGGTTGCTTCTT    | CTTTTAAGCTTCCTTCCTCC     |
| <b>BGR56</b> | GGGAGGAAGATGGAGATTTA    | GAACACTTATCAGCCGTTTC     |
| <b>BGR58</b> | AGCAGTGTATCCGCACTATC    | TAATATTGTTTGGAGCAGGC     |
| <b>BGR60</b> | GAAACTGGAGAAAGGAAAGG    | CCATCGTCACGAACTACATA     |
| <b>BGR61</b> | GCCACAAAACACTACTAGATGGA | CAAACATCCATGTCTTCCG      |
| <b>BGR64</b> | CTCCTGTAAACCACCATCAT    | CTCCGTTAACAACCATCATT     |
| <b>BGR65</b> | GTTGAAAGCTTACGCAGTCT    | ACCTGAAGCTCTGAAACTCA     |
| <b>BGR66</b> | GCTCTTCATGATGTTCCATT    | CCTTAGATGAACCTACATTCCG   |
| <b>BGR69</b> | AGACGAGTCATCTCCATCG     | GCAACATGAAGAAGAAGAGG     |
| <b>BGR70</b> | AGAGAGTTTCAGGCTTTGGT    | GGGAAAAGAGTGGAGAGAGT     |
| <b>BGR71</b> | TCTACTTCTCTCCCTCCTCC    | AGAGAGAAATGGGAGAAACC     |
| <b>BGR74</b> | ACAAACACCTCGATCTCATC    | GGGGGAGAGATAGATACCTG     |
| <b>BGR75</b> | ACACGTCTCCATGAAAAAGA    | GTTCCATGGACAGAAGAAGA     |
| <b>BGR80</b> | TCGATATGTATTCAGGGGAG    | GAGTCATCAGCATCTTCCTC     |
| <b>BGR83</b> | TCTTTCTCAGTCCCTCTTGA    | GTTCCATGCAAATCCATAGT     |

|                  |                         |                        |
|------------------|-------------------------|------------------------|
| <b>BGR84</b>     | CCTCCTTACCCTAACCCCTAA   | CCATAACCAGGTGAGGAAG    |
| <b>BGR87</b>     | AGGATGGTGAAGTGAAACAG    | TAATCTCCGTTGATCTCCAG   |
| <b>BGR88</b>     | GTTCCAACCATAAGCCCT      | GATAAAACCTGCGGTCAC     |
| <b>BGR89</b>     | ATAGTAAACCACCACAACCG    | ACTATAGGCCCTCTCTGTCC   |
| <b>BGR93</b>     | CAAGTCAAGTCCCAATCAAC    | TTGCTGAGAGAGTGATGGA    |
| <b>BGR98</b>     | GGTTATACCTTTTGGGAAGG    | CAGTGTCTCCCTTTGTTCTC   |
| <b>BGR99</b>     | GGATAAGCGATACACACCTT    | TATGAGATACTGGTGCGTGT   |
| <b>BGR100</b>    | CTTAAAATCCTCCAGGAACC    | CTCTTAGCATTGGGATTAGC   |
| <b>BnEMS14</b>   | TTTGTGAGTGGTCTTGATTT    | AATGGATAATACTGATGCTCTT |
| <b>BnEMS20</b>   | CTCTATCCGAAGTGAATGATG   | GTCGTCAACCCACACAAA     |
| <b>BnEMS57</b>   | ATGTTGGGTAAAGGCTACTG    | CTGCTCTCTGTTCTGCTTATC  |
| <b>BnEMS59</b>   | ACACCACCGTCCAGAAGA      | TATCACTCTCAAACCTCCCA   |
| <b>BnEMS60</b>   | TATCACTCTCAAACCTCCCA    | ACACCACCGTCCAGAAGA     |
| <b>BnEMS82</b>   | AGAAGGAAGGTTTGCTCACT    | CAACACAGAGATTGGTTCATC  |
| <b>BnEMS146</b>  | AGGTGATTTCTCTTCTCGGT    | TACTTTGTCTGAGTGTGGTGG  |
| <b>BnEMS439</b>  | TCTATAGCCAGCGCTCTTAC    | TAGTCATTGCACATTGCTTC   |
| <b>BnEMS634</b>  | GCACACACCTTTCTTTCTTC    | GTCCTCGGTGCTTATGTTAG   |
| <b>BnEMS695</b>  | GCTGGTAAATTGTTCCATTA    | CGTAAGGAAGACCAAGAACA   |
| <b>BnEMS812</b>  | ATTCTCTGCCTCTAGGCTTT    | AAGACATGTTTGATTCCGAC   |
| <b>BnEMS820</b>  | ATACTGTCAAGAAGCCCAAA    | AAGAATCCAACCATGGATAA   |
| <b>BnEMS824</b>  | CACAATCCCCTCTCAAGTT     | TCCATTTCAAGAAGTAGGGA   |
| <b>BnEMS843</b>  | CGGAGTCCAATACGAATAAG    | GGATGTTGCTAGGTAAGCAC   |
| <b>BnEMS860</b>  | TGGTGACTACTACTAAATCGAGA | GAGAGTAGAATGAAGCCACG   |
| <b>BnEMS973</b>  | GTCTTCGTTGTGTCCTCAGT    | TAATGATGCTTCTCGGTCTT   |
| <b>BnEMS993</b>  | CCTATTCGACCACAATGAAT    | GAGAGTTGGCTCGAGTG TAG  |
| <b>BnEMS994</b>  | TGATTCCTCTCCTCCTCATA    | TGCTAGCTTCCTTCATAAGC   |
| <b>BnEMS1012</b> | ACCTAACTCGCACTTCTTCA    | TTGGTAGAGAAACCAGAGGA   |
| <b>BnEMS1036</b> | CGTACCTGAGGCAGT TACTC   | GGAATCCGTTATTTGATTGA   |
| <b>BnEMS1072</b> | GATATCTTGATTAGGGTTCTTAT | GTTCTCCTGCATTTAGATCG   |
| <b>BnEMS1084</b> | AAGGTGATGATGGTAAATGC    | TCTCTCTGTTCGATGTCCTT   |

|                  |                       |                        |
|------------------|-----------------------|------------------------|
| <b>BnEMS1116</b> | GAAATTGGCCACATGTATTT  | CCAAGACCTCCCTATCTTCT   |
| <b>BnEMS1119</b> | ACTGGAGTTTCAATTGGATG  | CATCATCTTCAGCACTAGCA   |
| <b>BnEMS1124</b> | ATGTTTCCTTTGCTCGTTAG  | GAAGCCCAACATTATTCAAA   |
| <b>BnEMS1144</b> | ATATCTCTCTTTGCGAACCC  | TGGATCTATTAGCTGCCATT   |
| <b>BnEMS1156</b> | ATCTGAACAATCAATCTCCG  | TTACGATACGCTCTCCTCAT   |
| <b>BnEMS1171</b> | CTGTGAGGAGAGAAAGGATG  | AGCTTACAGCTTCAACAGG    |
| <b>BnEMS1173</b> | CGAAATCCTCACAATCTCAG  | CGGAGATTGATTGTTTCAGAT  |
| <b>BnEMS1184</b> | AACGTCAGAGAAATGTGGAC  | GGCATTACTCAACGGTGTAT   |
| <b>BnEMS1185</b> | CTTCTTCAACCTCTCCCTTT  | GTGTTGAGCTTCTTGAGGAC   |
| <b>BnGMS9</b>    | GGAGGAGGAAGAGGAAGATA  | GGAGCTAGTGAAGCCAATAA   |
| <b>BnGMS87</b>   | TTCTTCACTGATCCCACTTT  | TGTCTGTAGCATTGATTGGA   |
| <b>BnGMS131</b>  | GAAGAAGAACATGGCTTGAG  | GCTTCAATTCAATCTTCACC   |
| <b>BnGMS133</b>  | CTTAAATTGTCCCTCCTCCT  | AAGAAATGAGCTTGAAGCAG   |
| <b>BnGMS147</b>  | AAGCAGTGAGCACTACACAA  | CTTCTTGCCTAACAATGACC   |
| <b>BnGMS153</b>  | CTCAATGCTAAGGATATCGG  | TCTGATCTTTCAGACTCCGT   |
| <b>BnGMS161</b>  | GAGTCTTGCTTTATCATGCC  | GATCTTTCACTTCAGCCTTG   |
| <b>BnGMS175</b>  | TGATCTTCCTGAGAATCAGC  | GAGGAAGAAGGAGAGAGGAA   |
| <b>BnGMS198</b>  | AGTTTCGGATACTTTCGGAT  | CATGTGACAAGAGAAACAA    |
| <b>BnGMS205</b>  | AAGAGAGACAGCGTGTGTGTT | GACTCTAGGAGAGTAGACGGC  |
| <b>BnGMS208</b>  | GGGTATTTGAGGGTATTGGT  | CATGTGACAAGAGAAACAA    |
| <b>BnGMS213</b>  | GTAGTACGGAGATGCGTGAT  | AAAGAACGAGTTGACTTTTCG  |
| <b>BnGMS249</b>  | AATAATAAGAAGGGATGGAA  | CACCTTAAGTGGTTTCTTGC   |
| <b>BnGMS265</b>  | ATAATCGTCGGTTCGATGTA  | GCTTTGTGTGAAGGAATTTG   |
| <b>BnGMS584</b>  | GTCCGTGTCGATCTACATTT  | CAAGACCATTGAGCTTCTT    |
| <b>BoGMS38</b>   | CCTTTGTTCAAGCACCATC   | CGTGGATTGAGAAGTAGCAGT  |
| <b>BoGMS125</b>  | GTTGGCTTCACTTCTCCTACT | GCATCTCATAATCAAAGGG    |
| <b>BoGMS154</b>  | CTACGGCTTCGTCTCGTC    | GCTTTGCGTTACATCTTTCT   |
| <b>BoGMS197</b>  | CCCTCTTGATTACAACGAAA  | GTATGTTTACCTGGACCTGACT |
| <b>BoGMS204</b>  | CCGATAGTAGTCAAAGCCTG  | GAAACCTAAACGGCACAA     |
| <b>BoGMS314</b>  | AGAAAGATGGAGAAGACGAAG | CGAGAAGAAGAGAGGAAAGAA  |

|                  |                        |                         |
|------------------|------------------------|-------------------------|
| <b>BoGMS319</b>  | GTCTTCCTTCATCCTTCTCC   | GGGCAACTTCGTCATTATC     |
| <b>BoGMS328</b>  | TTTATTCGGTTTATTCGGTTT  | GAAGGTGAGTCTTGATGGTG    |
| <b>BoGMS351</b>  | AGGTGGTGTAGTTGAGGAGAC  | TGACAGATGGGATAAGACAAA   |
| <b>BoGMS373</b>  | CTCTGACGAAGATGGCTG     | AAGTCTATGTTTGGATAAGGGA  |
| <b>BoGMS490</b>  | CTTGAGTCGTTTGTGTTGTT   | CAGAGGGAGTAGTGTTTATGG   |
| <b>BoGMS539</b>  | ACGACACCGTATTGATTCTC   | ATCCACTCACCTCCCAGT      |
| <b>BoGMS545</b>  | CCTCTGTTTCTTTGCTCTTTG  | GATTCATTGTGTGTGTGATGT   |
| <b>BoGMS560</b>  | ATGAAGAAGTGTTTGGTGAG   | AAGATTGATGGAAGCAAGAA    |
| <b>BoGMS561</b>  | CAAAGACTAAACCAGACCAAG  | ATAGGCAAGGTGAGAAGAAAG   |
| <b>BoGMS576</b>  | ACCTGGAGTTGAGACGGG     | CAGTGTTGAGTGTTCTTCTATT  |
| <b>BoGMS586</b>  | GCTGTATCATCTTCTTGCTCT  | TGTTTCTTTGTAGTTTGGTGG   |
| <b>BoGMS622</b>  | ATCTGCCTTCACCGACTT     | TCTGGTTCAGTTCGTTTATTT   |
| <b>BoGMS680</b>  | CTCTGCGTAAGAACATCACA   | CGCTAAACGACCTCTACCA     |
| <b>BoGMS693</b>  | CATCTCCACATCACTACTCCA  | ATTACCCAATCCCAACAAA     |
| <b>BoGMS788</b>  | CGCATTACTATCTCCATTGTC  | GGCTGTCACTCTCTTCGG      |
| <b>BoGMS795</b>  | AACTACCAAGTCGTGTGAGAA  | CAAAGTAAGCAAGTGGAGAAA   |
| <b>BoGMS819</b>  | AGGGAGATGGACACATTTAG   | GAGAGAGGGCAAAGAAGATAG   |
| <b>BoGMS829</b>  | CACACTCATCTCTGTTTCAGTT | TTCACTTCCAGCATTACGA     |
| <b>BoGMS876</b>  | TGATGATAACTTGTAATCTGCT | TTCTTTGGTGGTCCCTGGT     |
| <b>BoGMS1032</b> | GCCGTCGTCATCTTCTAC     | ATTGAGTATCCCTTCTCTGCT   |
| <b>BoGMS1059</b> | TAAGCACGCAACTGTGGA     | GGGTTATTTGAACGGAGTATG   |
| <b>BoGMS1072</b> | CATTGTCTCGTCTGCTCAA    | AGCCCATTAGTCTCTCTCAC    |
| <b>BoGMS1114</b> | CACCACTAACCTATGAACCTG  | TGTCTCTTCTCCACTTTGTTG   |
| <b>BoGMS1153</b> | ATTAGTGCGTATCATTGTGG   | GGGTTCTTGCTCTTGATT      |
| <b>BoGMS1166</b> | TAATGGAAACGCACCAAG     | AAACAATCTTAGCAGAGGAGG   |
| <b>BoGMS1186</b> | GACTGGAACGACAACGACT    | GCGGAGGTAGATTAGGGA      |
| <b>BoGMS1199</b> | CCTTACTTCTCTGTGGTTGG   | CGGGAACCTTGTGGACTT      |
| <b>BoGMS1200</b> | CCGTCGTCTCTCCTAAATC    | TTATTGGGTCGGTTATTCACT   |
| <b>BoGMS1201</b> | GGTAACACCAATCCACTTTCT  | CACTTCAAACCTTCTCATCTGG  |
| <b>BoGMS1203</b> | GTTATCCACGCTTTGGTG     | GCAAGACACTTATTATTTGAGAC |



|                  |                        |                        |
|------------------|------------------------|------------------------|
| <b>BoGMS1230</b> | AAGTTGTCCCTGTTCTGTG    | CATTCTTGGTCGGAGTTAGTT  |
| <b>BoGMS1246</b> | CACTACCCGTTTCGTTTCAG   | ACATTTCAGCCACTCTGCTT   |
| <b>BoGMS1295</b> | CTCCTTCTTCATTCTTCGG    | AATCTCCCTATTGCTTGTTT   |
| <b>BoGMS1303</b> | ACACGAGCCATCACCTACT    | CTCTCCTCCTCTCTTAGCATT  |
| <b>BoGMS1307</b> | TGGCGATAAAGAGGAGAAC    | CGAAGAGAGAGAAACAAAGAA  |
| <b>BoGMS1308</b> | ACGATTTGGTATCTTCTTTCC  | GTTCCGACTAACACTCTCTCA  |
| <b>BoGMS1320</b> | TCTCCAAATCCTTCTTCTCAC  | CCACCTTCTCCACTAATAACC  |
| <b>BoGMS1373</b> | CCACCTTCTCCACTAATAACC  | TCTCCAAATCCTTCTTCTCAC  |
| <b>BoGMS1375</b> | ACACACCATCTCTCTCATCTC  | GGAACCTCTCTGCTCTCAA    |
| <b>BoGMS1382</b> | CTTCCTGCGTCACTTTACC    | AGGCTGTCTCCTCACCCA     |
| <b>BoGMS1399</b> | ATGTTCCCATTTTCAGAGTCA  | TTATCCCAATCCTCATCATC   |
| <b>BoGMS1425</b> | GGCGGCAAGACTCAATAA     | ACTTTGGTTAGAGAAGAAATGA |
| <b>BoGMS1464</b> | CTGATGAACGGAGACACAG    | AAGCAAAGCAGAGCATAAAC   |
| <b>BoGMS1484</b> | ACCTGTTGTTCACTTCATCAC  | TTGAGTCGTCACTGTTTCATT  |
| <b>BoGMS1558</b> | CTACGACCTACAAGAATGCC   | CATCAGTAAAGCAGAGAACAAA |
| <b>BoGMS1561</b> | AGATAACGGATGTGAGGAGA   | CTTGAGAAGATTGGCTTGTT   |
| <b>BoGMS1575</b> | CCAGCAGAGAATGTGCCT     | TTGAAATAGACTTTGGTTTGG  |
| <b>BrGMS5</b>    | ATTTCCGATCATAGCTGTTCCA | TCAGAGAAACACAACACCAAGC |
| <b>BrGMS38</b>   | AGGTTTGGGAGATGCAGAGTT  | GCCACTGAGACTTCCTCCTCT  |
| <b>BrGMS124</b>  | CGAGGAGAACAGAAGGGATAGA | CGCTGGGTACAGAAACCTAAAC |
| <b>BrGMS216</b>  | ACACGGGCTACAAAACAAGAGT | ATGCTTCTGATTTAACCTGGGA |
| <b>BrGMS217</b>  | CATTCCGCCTAAGCTCATTAAC | CAATTTACCTGCACCTAGTCA  |
| <b>BrGMS231</b>  | TGAACCACCAACGTGTTCTTAC | TTCCCTAGATCCGCTGTCTTA  |
| <b>BrGMS268</b>  | TCACCATGTGTAAAAGACTCGG | TTGGCTTATCTTCTTGGGATTG |
| <b>BrGMS316</b>  | TGGGACCATAAATTGGATAAGG | GTGTGGTTTGTGAGAGATGGAA |
| <b>BrGMS351</b>  | TGCATCCAGACAGTTACCAAAT | TTAACGCTCATTTCACTTCCTC |
| <b>BrGMS363</b>  | AAGAAGTCTCACAAACGAAGCC | AAGATCAAAACCTCATTGCC   |
| <b>BrGMS375</b>  | TATTGGAGGCATCACATCTCAA | AGCTGCAACACAGAGAAAGACA |
| <b>BrGMS387</b>  | GCGTAATCTCAAGCGAAACAAT | GAAGCCGACAATTCCCCT     |
| <b>BrGMS394</b>  | ATCTACTTTCCCTTACCACCA  | GAAATGATCTTGCTGACCACAC |

|                 |                           |                           |
|-----------------|---------------------------|---------------------------|
| <b>BrGMS406</b> | TCGATAGACTGAGCAACGGTAA    | GGATACACATTTTGGGAGAGGA    |
| <b>BrGMS426</b> | CCGTTGAAGTTGTAGAGACGAG    | TGCTTGAAATACATGATACCCC    |
| <b>BrGMS509</b> | TGGAGACGTGTGTTTCATTTTCAT  | GTTACCCCCTGACATTAGTTGG    |
| <b>BrGMS556</b> | GGTTGGTTCCTCCTCTTCTTCT    | TTTAACTTCAGCATCTGGGGAT    |
| <b>BrGMS679</b> | ACTGGCGAGAAAAGAGATGAAG    | GAGAATGGGCTTTGTTAGTTGG    |
| <b>BrGMS725</b> | GATCACATATTCGTCTGTGTTGC   | AGGAAGTGACGTGTTCCGTAT     |
| <b>BrGMS726</b> | GATCATTGCTTATCCTGCGAAT    | ACGGCATGGAAACGTCTATAA     |
| <b>Ap1c 5pr</b> | GCGTAGGAGGTGGTAAAGATAGC   | ACACCCACATTGCATTTTACCC    |
| <b>BN12A</b>    | GCCGTTCTAGGGTTTGTGGGA     | GAGGAAGTGAGAGCGGGAAATCA   |
| <b>BN25C2</b>   | AAACCTCCTCAAAAACCCCTAAACG | TCCCCTCTTTCCTCTCTCTAGGC   |
| <b>BN38A</b>    | TGGTAACTGGTAACCGACGAAAATC | ACGCTGTCTTCAGGTCCCCTC     |
| <b>BN9A</b>     | GAGCCATCCCTAGCAAACAAG     | CGTGAAGCAAGTGAGATGAT      |
| <b>BRAS005</b>  | CGTTCGTTGTTGCCCTCTACT     | CTCTACACGACGGCGATAAAA     |
| <b>BRAS019</b>  | CTCAAGACAAACGACCAGTAA     | GAGAAGAAATCGCCAAGA        |
| <b>BRAS021</b>  | ACCGTTGAGATCAATCCCTAT     | CATCTTCCTTAATCGAAACCC     |
| <b>BRAS051</b>  | GAATAGCCTCGCAGAAGTAGC     | CGACGGCGATAAAAACGAA       |
| <b>BRAS063</b>  | GACGCTCATTTCACTTC         | TCCTAACTAACATCATTTTGC     |
| <b>BRAS072</b>  | GCCATCTACACATTTATCCC      | CACTAACCTTCTTGCTACCGT     |
| <b>BRAS074</b>  | AATTTAAACCTCATTTTCTTC     | ACCTCCATTGTGTCTGAT        |
| <b>BRAS083</b>  | GATGTTGTTGGGGAGAATG       | AAAAAGTAGGCAAGTTCAAGC     |
| <b>BRAS087</b>  | GCAGAATAGCCTCGCA          | GGAGGAAAAGAACGTGG         |
| <b>BRAS120</b>  | AAAAATAAATACAGCGAACC      | ACCTTTAGCAGCTAATCATC      |
| <b>BRMS-006</b> | TGGTGGCTTGAGATTAGTTC      | ACTCGAAGCCTAATGAAAAG      |
| <b>BRMS-007</b> | AAATTGTTTCTCTTCCCAT       | GTGTTAGGGAGCTGGAGAAT      |
| <b>BRMS-008</b> | AGGACACCAGGCACCATATA      | CATTGTTGTCTTGGGAGAGC      |
| <b>BRMS-026</b> | CCTATCCTCGGACTAATCAGAA    | GTGCTTGATGAGTTTCACATTG    |
| <b>BRMS-049</b> | GATCTTCTCTCCAAACTCTCT     | AAAGTCCAAGCTAAATTACAAA    |
| <b>BRMS97</b>   | AAGAGCAAGAGCCAAGACAGCCTAC | TGGTGATGGAGAAGTACATGGACGT |
| <b>CALSSR</b>   | GTTAAGTGTGGCGTTAGAGG      | CCTTGGTACATGCCACTGAA      |
| <b>CB10022</b>  | AACAACCAAACATAGTCCC       | GTTGACTTTGACCTTGACTT      |

|                  |                            |                          |
|------------------|----------------------------|--------------------------|
| <b>CB10028</b>   | CTGCACATTTGAAATTGGTC       | AAATCAACGCTTACCCACT      |
| <b>CB10034</b>   | TACGGGATAGGCGACGAA         | CCTAAGCGAGACGTATTG       |
| <b>CB10057</b>   | CTAGGCTAAGGAAGATTGTCA      | TAGTTTCTTCCTCCTGCTATC    |
| <b>CB10196</b>   | TTGTAGGCAATGATGAGGA        | GAGAGAAGGGCTCCTTTG       |
| <b>CB10217</b>   | CCCCATATCATCCCTACC         | GCTGAACAACCCACAAAG       |
| <b>CB10258</b>   | ATGATGCCTAGCATGTCC         | AAGCTAAAGCGAAAGAAGC      |
| <b>CB10297</b>   | CTCATTCCACTGCCAAAC         | ACGAGTCACCATGTCAGG       |
| <b>CB10299</b>   | TACAGGTTCCCTTGCGATG        | ATGGACGAGACAACATGG       |
| <b>CB10330</b>   | AGGCGAGTTTACGAGGAT         | ACCTGCACCAGTCATTTG       |
| <b>CB10347</b>   | ATCTGAACACTTTCGGCA         | GGAAGCACCATGTCAGC        |
| <b>CB10413</b>   | CTTAGCACAACCACTCGG         | GGTGATGAAGATGACGATG      |
| <b>CB10439</b>   | ACCTCGAAGGGTATCTGC         | CGTGCAATTTCAACAACA       |
| <b>FITO007.2</b> | ggtcggcagagagctttaag       | cctaaaatttaategcagccg    |
| <b>FITO018</b>   | tgccaagctttgagtagcaa       | tgccttctccatgctttct      |
| <b>FITO035</b>   | aaagtcgtgggaagtatcgt       | aggtgtaaggatggtgtagt     |
| <b>FITO095</b>   | agatttcatccacagcctc        | tttgattcttgcgttctctc     |
| <b>FITO114</b>   | gcgatacaaagaaatccaaa       | caacaaataaccaaacattga    |
| <b>FITO131</b>   | ctacaacgggcagggtga         | aaatcccatctactggtttga    |
| <b>FITO135</b>   | tgtaagacaacaccattcctt      | cacagtcacatccaccataac    |
| <b>FITO136</b>   | cctcctcctcagacttacact      | tcacatccaccataaccttt     |
| <b>J0609</b>     | GTTGGTTAAAATCGTGTATGC      | CCTACAAAAAGCAATAACGTG    |
| <b>MR52a</b>     | TCGACATGGATTCTACCAAA       | GAACTTGCAAGCTGCAATTA     |
| <b>Na10-A09</b>  | TCTTGAGCAAAGAACTTGG        | CAAACCTGAGCCATACACAAAGG  |
| <b>Na10-C01</b>  | TTTTGTCCCACTGGGTTTTTC      | GGAAACTAGGGTTTTCCCTTC    |
| <b>Na10-E02</b>  | TCGCGCATGTAATCAAAATC       | TGTGACGCATCCGATCATAAC    |
| <b>Na10-G10</b>  | TGGAAACATTGGTGTTAAGGC      | CATAGATTCCATCTCAAATCCG   |
| <b>Na12-A01</b>  | GCATGCTCTTGATGAACGAA       | GCTTCAACCTCTCAATCGCT     |
| <b>Na12-B02</b>  | CGCGTTGTAACCTCCAAGACC      | TTTTCTAAATCATCCACTGTATCC |
| <b>Na12-C01</b>  | CCAGGTTACTGTAAAGAATAAGAGAG | ATCGTCTGCGAGTCTCCTTG     |
| <b>Na12-C06</b>  | AACGGATGAAGAACACATTGC      | TAGGGCCTGTTATTTCGATGG    |

|                    |                           |                             |
|--------------------|---------------------------|-----------------------------|
| <b>Na12-C08</b>    | GCAAACGATTTGTTTACCCG      | CGTGTAGGGTGATCTAGATGGG      |
| <b>Na12-D08</b>    | ACGACGATTCAACTCATCTTC     | TTAACCAACTTCGCTTTTTG        |
| <b>Na12-D11</b>    | AATTGCATTTTGTATCCAGCG     | ACATCCCTAGGATCAATGCC        |
| <b>Na12-E01</b>    | ATTCCATGACTCCATTGTC       | AAATCCCTTGTCTCTGTGCG        |
| <b>Na12-E02</b>    | TTGAAGTAGTTGGAGTAATTGGAGG | CAGCAGCCACAACCTTACG         |
| <b>Na12-E05</b>    | CGTATGTTTGTTCACCTGC       | ACTAGCAACCACAACGGACC        |
| <b>Na12-E09</b>    | CATGAGAACAAGATGGGTTCG     | CTGAAACTTGAGCAAAGCCC        |
| <b>Na12-F03</b>    | GGCGACATAGATTTGAACCG      | TCCACTTTCTCTCTCTTCCCC       |
| <b>Na12-G05</b>    | CCGATCATACTTTTACTCTAGCC   | GATGTTCCCTCTCGGTGATGC       |
| <b>Na12-H02</b>    | CTATGGTTCATCTTTCGCCG      | GCTGCACATCCATCTCTCG         |
| <b>Na12-H09</b>    | AGGCGTCTATCTCGAAATGC      | CGTTTTTCAGAATCTCGTTGC       |
| <b>Na14-B03</b>    | GATGGTCGCCGATTCAATGA      | CCCATCAGCACTAGAAACCA        |
| <b>Na14-E02</b>    | ACTGGCTACATGAGTTTCAGTG    | GAGGGAAGACAACCTGGTCTCA      |
| <b>NIAB_SSR106</b> | GTCTCAAGCCAACATCCATC      | AACGGAACCATAAGGAGACC        |
| <b>O109-A06</b>    | TGTGTGAAAGCTTGAAACAG      | TAGGATTTTTTTTGTTCACCG       |
| <b>O110-B01</b>    | CCTCTTCAGTCGAGGTCTGG      | AATTTGGAAACAGAGTCGCC        |
| <b>O110-D01</b>    | TCTCTGCCAAAAGCAAATAGC     | CTTGGCTCTCTCTCACCACC        |
| <b>O110-D03</b>    | GCCAAAGACCTCAAAGATGG      | AAGCCACGTGAAGAAAGTCC        |
| <b>O110-E05</b>    | GCCAGAAACAGGAGAAATGG      | GAAGCCGAAGAAAATAAGCG        |
| <b>O110-F09</b>    | AGAGAGCGAGATTGATTGGC      | AAACGACCACGAGTGATTCC        |
| <b>O111-B05</b>    | TCGCGACGTTGTTTTGTTC       | ACCATCTTCCTCGACCCTG         |
| <b>O111-H09</b>    | CCTTTTCCCCTTCTATTGG       | GTGCGACTTGGAATTTCTCC        |
| <b>O112-E03</b>    | CTTGAAGAGCTTCCGACACC      | GACGGCTAACAGTGGTGGAC        |
| <b>O113-G05</b>    | GTGTGCAGGAAACGATGTTC      | GGGAGTTTGAAGAGAAAGCG        |
| <b>pMR181</b>      | AGATTTGCATGTGGTTTGAC      | ATTGCTTANTGATGTTGGGAA       |
| <b>Ra2-G08</b>     | ATGTCCGGATAACCGAATCC      | GAAGCTTTTCAATTTTAAAGTTCTCTC |
| <b>Ra3-D04</b>     | AAAAGGACCTACCAATTTTCGTG   | CGACCCAAACTGAGCCATAC        |
| <b>sN0706</b>      | TCCGACGGTCAAGATTAAGG      | GGCTGTGGTGGATCTAGGAA        |
| <b>sN13034</b>     | AGCATGTGCAGAGTGCAGAC      | AAAGGAAGGCCGATGAGATT        |
| <b>sN1988</b>      | TTCCCTCCCTCCCTCTTAAA      | CGTTGGATGCAGAGCTGTTA        |

|                 |                       |                          |
|-----------------|-----------------------|--------------------------|
| <b>sN2025</b>   | AAGGAGCAAACACAAGCGAT  | GCACAAGCACTCTACGGTGA     |
| <b>sN2032</b>   | CACCATCACACCTTCACAA   | TGGTTCACTCATGTCTCCGA     |
| <b>sN2837</b>   | CACACCCTTACCACGTTTCCT | GCAACAAAGCATACTTCGCA     |
| <b>sN3523R</b>  | CGTTGGCAAAAAGCCTACTC  | CTCAGGGACGTCGTAAGAGC     |
| <b>sN3761</b>   | CGACAGAGGGTTCAAATGGT  | CGGTGTGTAGGTCTGCTCAA     |
| <b>sN9425</b>   | CGCCGACTTTAAAGAGATGG  | TCCTTGGGTTGGTCACTGAT     |
| <b>sNRA56</b>   | AATCTTCGCATACCCATTTCG | GTTTGACGCGGATAACCATC     |
| <b>sNRA59</b>   | CAGATTCGGATTTGGGAAGA  | GGCGGAAGAATCAAAGGAGT     |
| <b>sNRH63</b>   | GAATCAGTCACCAGGGGAGA  | CCATCGCGGTAATTAACCT      |
| <b>sORH13</b>   | CCTGATGTTTTGGTTGTGTCA | TCACTGTGTTTACTTGCGCC     |
| <b>sR0282R</b>  | AGGAAGCCCAACAGGACTTT  | AATTTCGATTCTCCATCGTGC    |
| <b>sR10417</b>  | CGGAGAAGAAACGAGCATTTC | TAGGGTTTCTGACCCGATTG     |
| <b>sR12095</b>  | GCTGCGAGGAAATCAGAGTTC | TACACACTTGATCGCGCTTC     |
| <b>sR12137I</b> | TCGGAATCAGATTAACCCG   | CATTATTGAAAAACACACGCC    |
| <b>sR12156</b>  | TTCTTGGTGTGTCCTGCAAA  | GAGCTATGGCAATCCTCCTG     |
| <b>sR12777</b>  | CAAGCAGTTTAAGGAACCGC  | ATAATTGCATTTTGCTCCGC     |
| <b>sR3688</b>   | GGAGTCCACTTCATGGAGGA  | CTCTTGCTCGTAGGTTTCCG     |
| <b>sR4047</b>   | AGAGAGGGTGTGTGCCAG    | ATTCTTTGAATGGCCAGCAC     |
| <b>sR6083</b>   | CTTGTTCTTGCGTAGCCACA  | ACTTTGCTCTGGCTCAGCTC     |
| <b>sR6293</b>   | CCAAACGCTTTTCTTTCTGC  | CCAATGACGCTCCAAGATTT     |
| <b>sR7223</b>   | AGGACCCGACTTTCCTTGTT  | ACCAAACCTCGGCGTACAAAT    |
| <b>sR9251J</b>  | TCTCCAGTACGGGGAAGAGA  | CAAAGAAGCCATGTGTGGAA     |
| <b>sR9411</b>   | GAGCATAGGGCAAAAACCTGC | CGATGTCGCTCTCAATCTCA     |
| <b>sR9447</b>   | AAATTCGAAAATGCAAACGG  | CCAATCTTGAACAATAGAAGATG  |
| <b>sR9477</b>   | CAGCTGGTTATCCTCGGTTT  | CCTCAGGTGGACAGAGAAGC     |
| <b>sS1867A</b>  | TCACCAGGGCTGATCTATGA  | GGGTGATCTAGATGGGTGAGTG   |
| <b>sS2131</b>   | TTGCTTCCAGAGATCTGGTTC | TGCGACTACTAAATTGTCGTGTT  |
| <b>sS2277</b>   | GATCTGCGGTAGGAATCGAA  | CGTGCTACATAATAGGGAAAAACC |
| <b>sS2331B</b>  | TGTCCTGTTTTCTGTGCTGG  | GCCAACGCTAGTTTTGCTTC     |

---
